# Supplementary material
Source: Research Square preprint supplement (doi:10.21203/rs.3.rs-9383173/v1)
Supplement: Supplementary file 1 [file 2a68ebce37cc2a2f82bca13b.xlsx]

## Sheet: Sheet1
LLM	GPT-5 Score (ICC(2,1), [95% CI])	Gemini 3 Score	NHS Score	Mean ICC	Reliability
		(ICC(2,1), [95% CI])	(ICC(2,1), [95% CI])
Claude Sonet 4.5	0.782 [0.510–0.900]	0.740 [0.520–0.860]	0.861 [0.740–0.930]	0.795	Good
Deepseek V3.2	0.796 [0.460–0.910]	0.727 [0.290–0.880]	0.871 [0.750–0.930]	0.798	Good
GPT-5	0.864 [0.760–0.920]	0.829 [0.700–0.900]	0.872 [0.770–0.930]	0.855	Good
Gemini 2.5 Pro	0.726 [0.470–0.860]	0.708 [0.420–0.850]	0.871 [0.770–0.930]	0.768	Good
Llama 4	0.879 [0.780–0.930]	0.755 [0.530–0.870]	0.888 [0.800–0.940]	0.841	Good
