# Supplementary material
Source: Research Square preprint supplement (doi:10.21203/rs.3.rs-9383173/v1)
Supplement: Supplementary file 1 [file 21cf8baf83bb4322e08b8747.pdf]

## Age-related Macular Degeneration (AMD)

### Royal College of Ophthalmologist (RCOphth) Leaflet:

<https://www.rcophth.ac.uk/wp-content/uploads/2023/03/APDF-SE181001-Understanding-Series%E2%80%93AMD.pdf>

### NHS leaflet:

<https://mft.nhs.uk/app/uploads/sites/2/2018/05/REH-212-Treatment-of-Age-Related-Macular-Degeneration-AMD-by-Intravitreal-Injection-1.pdf>

| RCOphth leaflet section heading           | NHS section heading                       | GenAI prompt                                                                        | NHS text                                                                                                                                                                                                                                                                                                                                                                                                                                                                                                                                                                                                                                                                                                                                                                                                                               | GPT-5 output                                                                                                                                                                                                                                                                                                                                                                                                                                                                                                                                                                                                                                                                                                                                                                                                                                                                                                                                                                 | Gemini 3 output                                                                                                                                                                                                                                                                                                                                                                                                                                                                                                                                                                                                                                                                                                                                                                                                                                                                                                     |
|-------------------------------------------|-------------------------------------------|-------------------------------------------------------------------------------------|----------------------------------------------------------------------------------------------------------------------------------------------------------------------------------------------------------------------------------------------------------------------------------------------------------------------------------------------------------------------------------------------------------------------------------------------------------------------------------------------------------------------------------------------------------------------------------------------------------------------------------------------------------------------------------------------------------------------------------------------------------------------------------------------------------------------------------------|------------------------------------------------------------------------------------------------------------------------------------------------------------------------------------------------------------------------------------------------------------------------------------------------------------------------------------------------------------------------------------------------------------------------------------------------------------------------------------------------------------------------------------------------------------------------------------------------------------------------------------------------------------------------------------------------------------------------------------------------------------------------------------------------------------------------------------------------------------------------------------------------------------------------------------------------------------------------------|---------------------------------------------------------------------------------------------------------------------------------------------------------------------------------------------------------------------------------------------------------------------------------------------------------------------------------------------------------------------------------------------------------------------------------------------------------------------------------------------------------------------------------------------------------------------------------------------------------------------------------------------------------------------------------------------------------------------------------------------------------------------------------------------------------------------------------------------------------------------------------------------------------------------|
| What is age-related macular degeneration? | What is age-related macular degeneration? | What is age related macular degeneration (AMD)? (restrict your answer to 154 words) | Age related macular degeneration (AMD) is an eye condition that causes problems with central vision but does not lead to total loss of sight. There are two types of AMD, dry and wet. In the 'dry' form of AMD, atrophy (or the wearing out) of the fine cells in the macula (the centre of the retina) occurs. No treatment has yet been proven to prevent or cure dry AMD, but research in this field continues. Currently low vision aids can be used to support vision. In the 'wet' form of AMD, abnormal blood vessels grow under the macula and affect the centre of the vision. Often such vessels leak blood or fluid and cause blurred or distorted vision. Without treatment, central vision loss can rapidly get worse. Treatment of AMD cannot undo many of the changes already present in the eye, so often the goal of | Age-related macular degeneration (AMD) is an eye condition that affects the macula—the central part of the retina responsible for sharp, detailed vision. It is a leading cause of vision loss in people over age 50. AMD develops when the macula deteriorates, making it difficult to see fine details and perform tasks like reading, driving, or recognizing faces. There are two main types: <b>dry AMD</b> , caused by thinning of the macula and build-up of drusen (yellow deposits), and <b>wet AMD</b> , involving abnormal blood vessel growth under the retina that leaks fluid or blood. Dry AMD progresses slowly, while wet AMD can cause rapid vision loss. While AMD doesn't lead to complete blindness, it can severely affect central vision. Risk factors include aging, genetics, smoking, and poor diet. Early detection through regular eye exams is important, as certain treatments and lifestyle changes can slow progression and preserve vision. | Age-related macular degeneration (AMD) is an eye disease that can blur your central vision. It occurs when aging causes damage to the macula, the part of the eye that controls sharp, straight-ahead vision. AMD is a leading cause of vision loss in older adults (typically 50 and older). While it rarely causes total blindness, losing central vision makes it difficult to see faces, read, drive, or perform close-up work. There are two main types: 1. <b>Dry AMD</b> : The most common form (about 80% of cases), occurring when parts of the macula thin with age and tiny clumps of protein grow. 2. <b>Wet AMD</b> : Less common but more serious, causing faster vision loss due to abnormal blood vessels growing under the retina and leaking fluid. Currently, there is no cure for AMD, though treatments like anti-VEGF injections can manage wet AMD, and specific nutritional supplements may |

|                       |                                        |                                                                            |                                                                                                                                                                                                                                                                                                                                                                                                                                                                                                                                                                                                                                                                                                                                                                                                                                                                                        |                                                                                                                                                                                                                                                                                                                                                                                                                                                                                                                                                                                                                                                                                                                                                                                                                                                                                                                                                          |                                                                                                                                                                                                                                                                                                                                                                                                                                                                                                                                                                                                                                                                                                                                                                                                                                                                                                                       |
|-----------------------|----------------------------------------|----------------------------------------------------------------------------|----------------------------------------------------------------------------------------------------------------------------------------------------------------------------------------------------------------------------------------------------------------------------------------------------------------------------------------------------------------------------------------------------------------------------------------------------------------------------------------------------------------------------------------------------------------------------------------------------------------------------------------------------------------------------------------------------------------------------------------------------------------------------------------------------------------------------------------------------------------------------------------|----------------------------------------------------------------------------------------------------------------------------------------------------------------------------------------------------------------------------------------------------------------------------------------------------------------------------------------------------------------------------------------------------------------------------------------------------------------------------------------------------------------------------------------------------------------------------------------------------------------------------------------------------------------------------------------------------------------------------------------------------------------------------------------------------------------------------------------------------------------------------------------------------------------------------------------------------------|-----------------------------------------------------------------------------------------------------------------------------------------------------------------------------------------------------------------------------------------------------------------------------------------------------------------------------------------------------------------------------------------------------------------------------------------------------------------------------------------------------------------------------------------------------------------------------------------------------------------------------------------------------------------------------------------------------------------------------------------------------------------------------------------------------------------------------------------------------------------------------------------------------------------------|
|                       |                                        |                                                                            | treatment is to prevent further loss of vision.                                                                                                                                                                                                                                                                                                                                                                                                                                                                                                                                                                                                                                                                                                                                                                                                                                        |                                                                                                                                                                                                                                                                                                                                                                                                                                                                                                                                                                                                                                                                                                                                                                                                                                                                                                                                                          | slow the progression of dry AMD.                                                                                                                                                                                                                                                                                                                                                                                                                                                                                                                                                                                                                                                                                                                                                                                                                                                                                      |
| How is AMD diagnosed? | How is the diagnosis of AMD confirmed? | How is the diagnosis of AMD confirmed? (restrict your answer to 144 words) | <p>AMD is confirmed by:</p> <ul style="list-style-type: none"> <li>• Optical Coherence Tomography (OCT) This is a camera scan that uses light to make a map of the retina at the back of the eye to show up any damaged areas. It is usually undertaken at every visit.</li> <li>• Optical Coherence Tomography Angiography (OCTA) This is similar to an OCT but gives even more information about the blood vessels at the back of the eye. This may be done at your first visit to help aid in diagnosis</li> <li>• Fluorescein Angiography (FFA) This is a diagnostic photographic test that uses a special dye called fluorescein which will be injected into a vein in your arm or hand. This gives a detailed view of the back of your eye and is usually only done once to confirm the diagnosis before starting treatment but can be repeated later on if required.</li> </ul> | <p>Diagnosis of age-related macular degeneration (AMD) is confirmed through a comprehensive eye examination by an ophthalmologist or optometrist. Key steps include:</p> <ul style="list-style-type: none"> <li>- Visual acuity test to assess central vision clarity.</li> <li>- Amsler grid test to detect distortion or blurring.</li> <li>- Dilated eye exam using special lenses to inspect the retina and macula for drusen, pigment changes, or fluid.</li> <li>- Optical coherence tomography (OCT) to create detailed cross-sectional images of the retina, identifying thinning, damage, or fluid leakage.</li> <li>- Fluorescein angiography for wet AMD diagnosis, highlighting abnormal blood vessels and leakage with a dye and camera. These tests help distinguish between dry and wet AMD and determine disease stage. Early detection allows timely treatment or lifestyle changes to slow progression and preserve vision.</li> </ul> | <p>Doctors confirm an AMD diagnosis through a comprehensive dilated eye exam. They use eye drops to widen your pupils, allowing them to inspect the retina for drusen (yellow deposits) or pigment changes. An Amsler grid test may also be used to check if straight lines appear wavy or missing to you. To verify the type and extent of the disease, advanced imaging is essential:</p> <ul style="list-style-type: none"> <li>* **Optical Coherence Tomography (OCT):** This non-invasive scan uses light waves to create detailed cross-sectional images of the retina, identifying thinning, swelling, or fluid accumulation. *</li> <li>**Fluorescein Angiography:** Often used if wet AMD is suspected, this involves injecting a colored dye into a vein in your arm. A special camera creates images as the dye travels through the eye's blood vessels, highlighting abnormal leaking vessels.</li> </ul> |

|                                       |                            |                                                                |                                                                                                                                                                                                                                                                                                                                                                                                                                                                                                                                                                                                                                                                                                                                                                                                 |                                                                                                                                                                                                                                                                                                                                                                                                                                                                                                                                                                                                                                                                                                                                                                                   |                                                                                                                                                                                                                                                                                                                                                                                                                                                                                                                                                                                                                                                                                                                                                                                                                                                           |
|---------------------------------------|----------------------------|----------------------------------------------------------------|-------------------------------------------------------------------------------------------------------------------------------------------------------------------------------------------------------------------------------------------------------------------------------------------------------------------------------------------------------------------------------------------------------------------------------------------------------------------------------------------------------------------------------------------------------------------------------------------------------------------------------------------------------------------------------------------------------------------------------------------------------------------------------------------------|-----------------------------------------------------------------------------------------------------------------------------------------------------------------------------------------------------------------------------------------------------------------------------------------------------------------------------------------------------------------------------------------------------------------------------------------------------------------------------------------------------------------------------------------------------------------------------------------------------------------------------------------------------------------------------------------------------------------------------------------------------------------------------------|-----------------------------------------------------------------------------------------------------------------------------------------------------------------------------------------------------------------------------------------------------------------------------------------------------------------------------------------------------------------------------------------------------------------------------------------------------------------------------------------------------------------------------------------------------------------------------------------------------------------------------------------------------------------------------------------------------------------------------------------------------------------------------------------------------------------------------------------------------------|
| <p>What is the treatment for AMD?</p> | <p>How is AMD treated?</p> | <p>How is AMD treated? (restrict your answer to 119 words)</p> | <p>Currently the most effective treatments for wet AMD are injections administered into the eye. The most commonly used drugs are Faricimab (Vabysmo), Aflibercept (Eylea), Ranibizumab biosimilar (Ongavia), and very rarely Brolucizumab (Beovu). These are given by injection into the eye and act to slow or stop the growth of the abnormal blood vessels and leakage that cause AMD. These drugs act broadly speaking in similar ways, by blocking the effects of the chemical vascular endothelial growth factor (VEGF), which cause these blood vessels to form and grow. Vabysmo also blocks another chemical process, angiopoietin-2 (Ang-2) that is involved in vascular growth. The clinician will discuss drug options with you and help you to choose the right drug for you.</p> | <p>Treatment for age-related macular degeneration (AMD) depends on the type and stage. Dry AMD: No cure, but progression may be slowed with lifestyle changes, such as quitting smoking, eating a nutrient-rich diet, and taking AREDS2 vitamin supplements containing antioxidants and zinc. Wet AMD: Managed with anti-VEGF injections that reduce abnormal blood vessel growth and leakage. In select cases, photodynamic therapy or laser treatments are used.</p> <p>Low-vision aids, magnifiers, and adaptive devices can help maintain independence. Regular monitoring is crucial to detect changes early.</p> <p>While treatment cannot restore lost vision, timely intervention—especially in wet AMD—significantly reduces the risk of severe central vision loss.</p> | <p>Treatment depends on the AMD type. For <b>dry AMD</b>, no medical cure exists, but <b>AREDS2 supplements</b> (vitamins C, E, zinc, lutein, and zeaxanthin) can slow progression in intermediate to late stages. <b>Low vision rehabilitation</b> helps patients adapt to vision loss using magnifying devices and techniques.</p> <p><b>Wet AMD</b> is primarily treated with <b>anti-VEGF injections</b> delivered directly into the eye. These medications reduce abnormal blood vessel growth and leakage, often stabilizing or even improving vision. In some cases, <b>photodynamic therapy</b> (combining a "cold" laser and light-sensitive drug) is used to seal leaking vessels.</p> <p>Lifestyle changes, such as quitting smoking and eating a nutrient-rich diet, are crucial for managing both forms and protecting remaining vision.</p> |
|---------------------------------------|----------------------------|----------------------------------------------------------------|-------------------------------------------------------------------------------------------------------------------------------------------------------------------------------------------------------------------------------------------------------------------------------------------------------------------------------------------------------------------------------------------------------------------------------------------------------------------------------------------------------------------------------------------------------------------------------------------------------------------------------------------------------------------------------------------------------------------------------------------------------------------------------------------------|-----------------------------------------------------------------------------------------------------------------------------------------------------------------------------------------------------------------------------------------------------------------------------------------------------------------------------------------------------------------------------------------------------------------------------------------------------------------------------------------------------------------------------------------------------------------------------------------------------------------------------------------------------------------------------------------------------------------------------------------------------------------------------------|-----------------------------------------------------------------------------------------------------------------------------------------------------------------------------------------------------------------------------------------------------------------------------------------------------------------------------------------------------------------------------------------------------------------------------------------------------------------------------------------------------------------------------------------------------------------------------------------------------------------------------------------------------------------------------------------------------------------------------------------------------------------------------------------------------------------------------------------------------------|

|                                          |                                               |                                                                                   |                                                                                                                                                                                                                                                                                                                                                                                                                                                                                                                                                                                                                                                                                                                                                                                                                    |                                                                                                                                                                                                                                                                                                                                                                                                                                                                                                                                                                                                                                                                                                                                                                                                                                                                                                                                                                                         |                                                                                                                                                                                                                                                                                                                                                                                                                                                                                                                                                                                                                                                                                                                                                                                                                                                                                                                                  |
|------------------------------------------|-----------------------------------------------|-----------------------------------------------------------------------------------|--------------------------------------------------------------------------------------------------------------------------------------------------------------------------------------------------------------------------------------------------------------------------------------------------------------------------------------------------------------------------------------------------------------------------------------------------------------------------------------------------------------------------------------------------------------------------------------------------------------------------------------------------------------------------------------------------------------------------------------------------------------------------------------------------------------------|-----------------------------------------------------------------------------------------------------------------------------------------------------------------------------------------------------------------------------------------------------------------------------------------------------------------------------------------------------------------------------------------------------------------------------------------------------------------------------------------------------------------------------------------------------------------------------------------------------------------------------------------------------------------------------------------------------------------------------------------------------------------------------------------------------------------------------------------------------------------------------------------------------------------------------------------------------------------------------------------|----------------------------------------------------------------------------------------------------------------------------------------------------------------------------------------------------------------------------------------------------------------------------------------------------------------------------------------------------------------------------------------------------------------------------------------------------------------------------------------------------------------------------------------------------------------------------------------------------------------------------------------------------------------------------------------------------------------------------------------------------------------------------------------------------------------------------------------------------------------------------------------------------------------------------------|
| <p>Frequency of anti-VEGF treatment.</p> | <p>How often do I need to get injections?</p> | <p>How often do I need to get injections? (restrict your answer to 137 words)</p> | <p>Injections are given at repeated intervals, based on what is necessary for your eye. Your eye doctor will tell you how often you will receive the injection, and over what length of time. When you discuss the treatment options you can discuss which type of injection might be better for you. Some injections can have a longer period of time between them. However, it is often necessary to attend for eye examinations and/or injections on a monthly basis and perhaps for several years. There is no limit to the number of injections we can give. If the doctor feels you will still benefit from injections you can continue to receive them. During follow up visits or phone calls, you will be checked for possible side effects and your progress and results will be discussed with you.</p> | <p>For wet age-related macular degeneration (AMD), anti-VEGF injections are typically given every 4–8 weeks initially, depending on the drug used and your response to treatment.</p> <p>In the loading phase (first few months), injections are often scheduled monthly to quickly control fluid leakage and abnormal blood vessel growth. After vision stabilizes and the retina appears dry on imaging, your eye doctor may extend the interval between injections—sometimes to every 8–12 weeks—based on ongoing monitoring.</p> <p>Some patients require long-term regular injections to maintain results, while others may transition to less frequent dosing using “treat-and-extend” or “as-needed” strategies.</p> <p>Skipping injections or delaying them can risk vision loss, so it's important to follow your doctor's schedule and attend all monitoring visits.</p> <p>Would you like me to explain what the injection process feels like and how to prepare for it?</p> | <p>Injection frequency varies significantly based on the specific medication used and how your eye responds to treatment. Typically, treatment begins with a "loading phase" of monthly injections for the first three months to dry up fluid.</p> <p>Once the condition stabilizes, your doctor determines the long-term schedule. Many ophthalmologists use a "treat-and-extend" approach: if your vision remains stable and no fluid is detected during check-ups, the interval between injections is gradually lengthened (often by two weeks at a time). While some patients require monthly shots indefinitely to maintain vision, newer longer-acting medications allow many patients to extend intervals to every 8, 12, or even 16 weeks. Ultimately, the schedule is personalized; you might receive treatment as rarely as three times a year or as often as every month, depending strictly on disease activity.</p> |
|------------------------------------------|-----------------------------------------------|-----------------------------------------------------------------------------------|--------------------------------------------------------------------------------------------------------------------------------------------------------------------------------------------------------------------------------------------------------------------------------------------------------------------------------------------------------------------------------------------------------------------------------------------------------------------------------------------------------------------------------------------------------------------------------------------------------------------------------------------------------------------------------------------------------------------------------------------------------------------------------------------------------------------|-----------------------------------------------------------------------------------------------------------------------------------------------------------------------------------------------------------------------------------------------------------------------------------------------------------------------------------------------------------------------------------------------------------------------------------------------------------------------------------------------------------------------------------------------------------------------------------------------------------------------------------------------------------------------------------------------------------------------------------------------------------------------------------------------------------------------------------------------------------------------------------------------------------------------------------------------------------------------------------------|----------------------------------------------------------------------------------------------------------------------------------------------------------------------------------------------------------------------------------------------------------------------------------------------------------------------------------------------------------------------------------------------------------------------------------------------------------------------------------------------------------------------------------------------------------------------------------------------------------------------------------------------------------------------------------------------------------------------------------------------------------------------------------------------------------------------------------------------------------------------------------------------------------------------------------|

## **Cataract**

### **Royal College of Ophthalmologist (RCOphth) Leaflet:**

[https://www.rcophth.ac.uk/wp-content/uploads/2025/09/APDF-SE180804\\_Understanding-Cataracts-2025-v01.pdf](https://www.rcophth.ac.uk/wp-content/uploads/2025/09/APDF-SE180804_Understanding-Cataracts-2025-v01.pdf)

### **NHS leaflet:**

<https://mft.nhs.uk/app/uploads/sites/2/2018/04/REH-001-What-you-need-to-know-about-cataract-surgery-4.pdf>

| RCOphth leaflet section heading | NHS section heading    | GenAI prompt                                              | NHS text                                                                                                                                                                                                                                                                                                                                                                                                                                                                                                                                                                                                                                                                                                                        | GPT-5 output                                                                                                                                                                                                                                                                                                                                                                                                                                                                                                                                                                                                                                                                | Gemini 3 output                                                                                                                                                                                                                                                                                                                                                                                                                                                                                                                                                                                                                                                                                                     |
|---------------------------------|------------------------|-----------------------------------------------------------|---------------------------------------------------------------------------------------------------------------------------------------------------------------------------------------------------------------------------------------------------------------------------------------------------------------------------------------------------------------------------------------------------------------------------------------------------------------------------------------------------------------------------------------------------------------------------------------------------------------------------------------------------------------------------------------------------------------------------------|-----------------------------------------------------------------------------------------------------------------------------------------------------------------------------------------------------------------------------------------------------------------------------------------------------------------------------------------------------------------------------------------------------------------------------------------------------------------------------------------------------------------------------------------------------------------------------------------------------------------------------------------------------------------------------|---------------------------------------------------------------------------------------------------------------------------------------------------------------------------------------------------------------------------------------------------------------------------------------------------------------------------------------------------------------------------------------------------------------------------------------------------------------------------------------------------------------------------------------------------------------------------------------------------------------------------------------------------------------------------------------------------------------------|
| What are cataracts?             | What is a cataract?    | What is a cataract? (restrict your answer to 110 words)   | <p>Every human eye has a very small lens inside it, which focuses the light that enters the eye to create a clear, sharp image. When that lens becomes cloudy it is known as a cataract.</p> <p>Cloudy lens inside the eye = cataract</p> <p>One or both eyes may be affected and contrary to what you might have heard, a cataract is not a skin that grows over your eye.</p> <p>As the cataract develops, it gradually restricts the amount of light entering the eye, and may cause:</p> <ul style="list-style-type: none"> <li>• Blurred vision.</li> <li>• Fading of colours.</li> <li>• A change in your spectacle prescription.</li> <li>• Visual problems dependent on lighting for example glare or halos.</li> </ul> | <p>A cataract is a clouding of the eye's natural lens, which lies behind the iris and the pupil. This cloudiness occurs when proteins in the lens clump together, reducing the amount of light that reaches the retina and causing blurry or dim vision. Cataracts often develop gradually and are common with aging, but they can also result from injury, certain diseases, prolonged UV exposure, or genetic factors. Symptoms include faded colors, glare, poor night vision, and frequent changes in eyewear prescription. Treatment typically involves surgical removal of the clouded lens and replacement with a clear artificial lens, restoring sharp vision.</p> | <p>A cataract is a cloudy area that forms in the lens of the eye, which is normally clear. As the cataract develops, it prevents light from passing clearly to the retina, causing vision to become blurry, hazy, or less colorful—much like looking through a frosty or fogged-up window.</p> <p>While most cataracts are related to aging, they can also result from eye injuries, certain medical conditions, or genetic disorders. Common symptoms include poor night vision, sensitivity to glare, and seeing halos around lights. When cataracts begin to interfere with daily activities, they are commonly and effectively treated with surgery to replace the cloudy lens with a clear artificial one.</p> |
| Why have I developed cataracts? | What causes cataracts? | What causes cataracts? (restrict your answer to 40 words) | <p>Most cataracts are the natural result of ageing, but they may occur in younger people due to many other reasons. Examples include:</p> <ul style="list-style-type: none"> <li>• Trauma or surgery to the eye</li> <li>• Diseases such as diabetes</li> <li>• Prolonged inflammation of the eye</li> </ul>                                                                                                                                                                                                                                                                                                                                                                                                                    | <p>Cataracts are primarily caused by aging, but can also result from eye injuries, diabetes, prolonged ultraviolet light exposure, smoking, certain medications, and genetic factors, all of which contribute to protein clumping in the lens, leading to clouded vision.</p>                                                                                                                                                                                                                                                                                                                                                                                               | <p>Cataracts mainly form when aging causes lens proteins to clump together, clouding the eye. Other contributors include diabetes, eye trauma, excessive UV exposure, smoking, prolonged steroid use, and genetic factors.</p>                                                                                                                                                                                                                                                                                                                                                                                                                                                                                      |

|                                          |                                             |                                                                                 |                                                                                                                                                                                                                                                                                                                                                                                                                                                                                                                                                                                                                                                                                                                                                                                 |                                                                                                                                                                                                                                                                                                                                                                                                                                                                                                                                                                                                                                                                                                                                                                                                 |                                                                                                                                                                                                                                                                                                                                                                                                                                                                                                                                                                                                                                                                                                                                                                                                |
|------------------------------------------|---------------------------------------------|---------------------------------------------------------------------------------|---------------------------------------------------------------------------------------------------------------------------------------------------------------------------------------------------------------------------------------------------------------------------------------------------------------------------------------------------------------------------------------------------------------------------------------------------------------------------------------------------------------------------------------------------------------------------------------------------------------------------------------------------------------------------------------------------------------------------------------------------------------------------------|-------------------------------------------------------------------------------------------------------------------------------------------------------------------------------------------------------------------------------------------------------------------------------------------------------------------------------------------------------------------------------------------------------------------------------------------------------------------------------------------------------------------------------------------------------------------------------------------------------------------------------------------------------------------------------------------------------------------------------------------------------------------------------------------------|------------------------------------------------------------------------------------------------------------------------------------------------------------------------------------------------------------------------------------------------------------------------------------------------------------------------------------------------------------------------------------------------------------------------------------------------------------------------------------------------------------------------------------------------------------------------------------------------------------------------------------------------------------------------------------------------------------------------------------------------------------------------------------------------|
| <p>What can be done about cataracts?</p> | <p>What is the treatment for cataracts?</p> | <p>What is the treatment for cataracts? (restrict your answer to 122 words)</p> | <p>The only proven treatment for cataracts is surgery, where the cloudy cataract lens is removed and replaced by a perfectly clear artificial lens, known as an 'intraocular lens implant,' allowing light to once again reach the back of the eye normally. Cataracts can take many years to develop. Cataract surgery is generally considered only when the cataract has progressed to the point that your day-to-day activities are affected, otherwise there may be no benefit in having the surgery. It is not however, necessary to wait until a cataract is fully developed, or 'mature'. There are rarely cases where insertion of an intraocular lens is not possible. In such cases contact lenses or glasses will be prescribed in order to correct your vision.</p> | <p>The primary treatment for cataracts is surgical removal of the cloudy lens, which is then replaced with a clear artificial lens called an intraocular lens (IOL). Cataract surgery is typically quick, safe, and performed under local anesthesia. It restores vision by allowing light to pass freely to the retina. Surgery is recommended when cataracts significantly impair daily activities such as reading, driving, or recognizing faces. In early stages, stronger eyeglasses, brighter lighting, or magnifying lenses may help manage symptoms temporarily, but these do not reverse the cataract. Recovery from surgery is usually rapid, with most people noticing improved vision within days, and complications are rare when performed by an experienced ophthalmologist.</p> | <p>The only effective cure for cataracts is surgery to remove the cloudy lens and replace it with an artificial intraocular lens (IOL). In early stages, symptoms can often be managed with stronger prescription glasses, anti-glare coatings, and brighter lighting. However, when vision loss interferes with daily activities like driving or reading, surgery becomes necessary. During this safe, common outpatient procedure, a surgeon typically uses ultrasound waves to break up and remove the damaged lens before inserting the clear IOL. Recovery is generally quick, with vision improving within days. Crucially, no eye drops or medications can dissolve or reverse cataracts; surgical intervention remains the only proven method to permanently restore clear vision.</p> |
|------------------------------------------|---------------------------------------------|---------------------------------------------------------------------------------|---------------------------------------------------------------------------------------------------------------------------------------------------------------------------------------------------------------------------------------------------------------------------------------------------------------------------------------------------------------------------------------------------------------------------------------------------------------------------------------------------------------------------------------------------------------------------------------------------------------------------------------------------------------------------------------------------------------------------------------------------------------------------------|-------------------------------------------------------------------------------------------------------------------------------------------------------------------------------------------------------------------------------------------------------------------------------------------------------------------------------------------------------------------------------------------------------------------------------------------------------------------------------------------------------------------------------------------------------------------------------------------------------------------------------------------------------------------------------------------------------------------------------------------------------------------------------------------------|------------------------------------------------------------------------------------------------------------------------------------------------------------------------------------------------------------------------------------------------------------------------------------------------------------------------------------------------------------------------------------------------------------------------------------------------------------------------------------------------------------------------------------------------------------------------------------------------------------------------------------------------------------------------------------------------------------------------------------------------------------------------------------------------|

|                                         |                               |                                                                                   |                                                                                                                                                                                                                                                                                                                                                                                                                                                                                                                                                                                                                                                                                                                                                                                                                                                                                                                                                                                                                                                                                                                                                                                                 |                                                                                                                                                                                                                                                                                                                                                                                                                                                                                                                                                                                                                                                                                                                                                                                                                                                                                                                                                                                                                                                                                                                                                                                                                                                                                                     |                                                                                                                                                                                                                                                                                                                                                                                                                                                                                                                                                                                                                                                                                                                                                                                                                                                                                                                                                                                                                                                                                                                                                                                                                                                               |
|-----------------------------------------|-------------------------------|-----------------------------------------------------------------------------------|-------------------------------------------------------------------------------------------------------------------------------------------------------------------------------------------------------------------------------------------------------------------------------------------------------------------------------------------------------------------------------------------------------------------------------------------------------------------------------------------------------------------------------------------------------------------------------------------------------------------------------------------------------------------------------------------------------------------------------------------------------------------------------------------------------------------------------------------------------------------------------------------------------------------------------------------------------------------------------------------------------------------------------------------------------------------------------------------------------------------------------------------------------------------------------------------------|-----------------------------------------------------------------------------------------------------------------------------------------------------------------------------------------------------------------------------------------------------------------------------------------------------------------------------------------------------------------------------------------------------------------------------------------------------------------------------------------------------------------------------------------------------------------------------------------------------------------------------------------------------------------------------------------------------------------------------------------------------------------------------------------------------------------------------------------------------------------------------------------------------------------------------------------------------------------------------------------------------------------------------------------------------------------------------------------------------------------------------------------------------------------------------------------------------------------------------------------------------------------------------------------------------|---------------------------------------------------------------------------------------------------------------------------------------------------------------------------------------------------------------------------------------------------------------------------------------------------------------------------------------------------------------------------------------------------------------------------------------------------------------------------------------------------------------------------------------------------------------------------------------------------------------------------------------------------------------------------------------------------------------------------------------------------------------------------------------------------------------------------------------------------------------------------------------------------------------------------------------------------------------------------------------------------------------------------------------------------------------------------------------------------------------------------------------------------------------------------------------------------------------------------------------------------------------|
| <p>What will happen before surgery?</p> | <p>Before your operation.</p> | <p>What should I do before the operation? (restrict your answer to 460 words)</p> | <p>We take the risk of infection very seriously as any eye infection around the time of surgery can result in loss of vision. For this reason it is essential that you observe a strict personal hygiene regime to include the following:</p> <ul style="list-style-type: none"> <li>• It is advisable that you wash your hands and face with anti-bacterial soap for 1 week prior to your operation to reduce the risk of infection.</li> <li>• We recommend that you wash your hair and take a bath/shower the evening before surgery.</li> <li>• Please ensure that clean clothes are worn on the day of surgery and that your footwear is also clean.</li> <li>• We recommend that you wear a front opening shirt, blouse or dress that is loose fitting, for your comfort.</li> <li>• If you normally wear contact lenses, please refrain from wearing them in the eye that will be operated on for a week before the surgery.</li> <li>• Please refrain from wearing eye make-up for a week prior to the surgery and on the day please ensure all traces of make-up are removed prior to surgery.</li> <li>• You should wear only minimal jewellery when you come to hospital.</li> </ul> | <p>Before undergoing cataract surgery, following proper preparation can help ensure the procedure goes smoothly and supports a safe recovery. Here's what you should do:</p> <p>1. Medical Evaluation and Eye Measurements<br/>Your ophthalmologist will perform a full eye examination and measure the size and shape of your eye to select the correct intraocular lens (IOL) for you. This may include ultrasound or optical scans. They will also review your medical history to identify any conditions that could affect surgery.</p> <p>2. Discuss Your Medications<br/>Tell your doctor about all the medicines, supplements, and herbal products you're taking. You may be advised to stop certain blood-thinning medications (such as aspirin, warfarin, or clopidogrel) before surgery to reduce bleeding risk. Do not stop these on your own—follow your ophthalmologist's instructions carefully.</p> <p>3. Manage Other Health Conditions<br/>If you have diabetes, high blood pressure, or other chronic illnesses, ensure they are well-controlled before the operation.</p> <p>Infections or inflammation anywhere in the body should be treated before surgery.</p> <p>4. Eye Drops Before Surgery<br/>Your ophthalmologist may prescribe antibiotic or anti-inflammatory eye</p> | <p>To ensure your cataract surgery is safe and successful, you must follow specific preoperative instructions. Your preparation begins weeks before the actual procedure and continues up to the moment you arrive at the surgery center.</p> <p><b>**Weeks Before the Surgery**</b><br/>About a week or two prior, you will undergo a painless ultrasound test called an A-scan or biometry. This measures the size and shape of your eye to determine the exact power of the intraocular lens (IOL) that will replace your natural lens. This is the time to finalize your choice of lens (monofocal, multifocal, or toric) with your surgeon.</p> <p>You must provide a complete list of medications and supplements. This is critical. If you take alpha-blockers (like Flomax) for prostate issues, tell your surgeon immediately, as these can cause "Intraoperative Floppy Iris Syndrome," requiring special surgical techniques. You may also be asked to temporarily stop blood thinners to reduce bleeding risks, though many surgeons now allow them to be continued depending on the specific technique used.</p> <p><b>**Days Before the Surgery**</b><br/>Most surgeons prescribe preoperative eye drops—typically an antibiotic to prevent</p> |
|-----------------------------------------|-------------------------------|-----------------------------------------------------------------------------------|-------------------------------------------------------------------------------------------------------------------------------------------------------------------------------------------------------------------------------------------------------------------------------------------------------------------------------------------------------------------------------------------------------------------------------------------------------------------------------------------------------------------------------------------------------------------------------------------------------------------------------------------------------------------------------------------------------------------------------------------------------------------------------------------------------------------------------------------------------------------------------------------------------------------------------------------------------------------------------------------------------------------------------------------------------------------------------------------------------------------------------------------------------------------------------------------------|-----------------------------------------------------------------------------------------------------------------------------------------------------------------------------------------------------------------------------------------------------------------------------------------------------------------------------------------------------------------------------------------------------------------------------------------------------------------------------------------------------------------------------------------------------------------------------------------------------------------------------------------------------------------------------------------------------------------------------------------------------------------------------------------------------------------------------------------------------------------------------------------------------------------------------------------------------------------------------------------------------------------------------------------------------------------------------------------------------------------------------------------------------------------------------------------------------------------------------------------------------------------------------------------------------|---------------------------------------------------------------------------------------------------------------------------------------------------------------------------------------------------------------------------------------------------------------------------------------------------------------------------------------------------------------------------------------------------------------------------------------------------------------------------------------------------------------------------------------------------------------------------------------------------------------------------------------------------------------------------------------------------------------------------------------------------------------------------------------------------------------------------------------------------------------------------------------------------------------------------------------------------------------------------------------------------------------------------------------------------------------------------------------------------------------------------------------------------------------------------------------------------------------------------------------------------------------|

|  |  |  |                                                                                                                                                                                                                                                                                                                                                                                                                                                                                                                                                                                                                                                                                                                                                                                                                                                                                                                                                                                                                                                                                                                                                                                    |                                                                                                                                                                                                                                                                                                                                                                                                                                                                                                                                                                                                                                                                                                                                                                                                                                                                                                                                                                                                                                                                                                                                                                                                                                                                                                                                           |                                                                                                                                                                                                                                                                                                                                                                                                                                                                                                                                                                                                                                                                                                                                                                                                                                                                                                                                                                                                                                                                                                                                                                                                                                                                               |
|--|--|--|------------------------------------------------------------------------------------------------------------------------------------------------------------------------------------------------------------------------------------------------------------------------------------------------------------------------------------------------------------------------------------------------------------------------------------------------------------------------------------------------------------------------------------------------------------------------------------------------------------------------------------------------------------------------------------------------------------------------------------------------------------------------------------------------------------------------------------------------------------------------------------------------------------------------------------------------------------------------------------------------------------------------------------------------------------------------------------------------------------------------------------------------------------------------------------|-------------------------------------------------------------------------------------------------------------------------------------------------------------------------------------------------------------------------------------------------------------------------------------------------------------------------------------------------------------------------------------------------------------------------------------------------------------------------------------------------------------------------------------------------------------------------------------------------------------------------------------------------------------------------------------------------------------------------------------------------------------------------------------------------------------------------------------------------------------------------------------------------------------------------------------------------------------------------------------------------------------------------------------------------------------------------------------------------------------------------------------------------------------------------------------------------------------------------------------------------------------------------------------------------------------------------------------------|-------------------------------------------------------------------------------------------------------------------------------------------------------------------------------------------------------------------------------------------------------------------------------------------------------------------------------------------------------------------------------------------------------------------------------------------------------------------------------------------------------------------------------------------------------------------------------------------------------------------------------------------------------------------------------------------------------------------------------------------------------------------------------------------------------------------------------------------------------------------------------------------------------------------------------------------------------------------------------------------------------------------------------------------------------------------------------------------------------------------------------------------------------------------------------------------------------------------------------------------------------------------------------|
|  |  |  | <p>• Please do not bring reusable handkerchiefs due to the infection risk that they create.</p> <p>In order to reduce the risk of your operation being cancelled due to a condition called Blepharitis (a chronic inflammation affecting the edges of the eyelids, leading to a build-up of deposits on the skin and the eyelash margins), we would like you to perform the following lid hygiene for one week prior to your operation:</p> <p>How to clean your eyelids using shampoo solution:</p> <ul style="list-style-type: none"> <li>• Wash your hands thoroughly before and after cleaning your eyelids.</li> <li>• Mix one teaspoonful of mild baby shampoo (any brand) into a mug full of boiled water that has cooled down. Commercially available lid shampoos are also available.</li> <li>• Use a clean face cloth and dip in the solution. Put the cloth over your finger and gently scrub the edges of your eyelids and between your eyelashes to remove any crusting or scaly deposits.</li> <li>• You must be careful not to touch your eye.</li> <li>• Rinse your eyelids thoroughly after cleaning using cooled boiled water on a clean face cloth.</li> </ul> | <p>drops to use in the days leading up to surgery to reduce infection risk and control swelling.5.</p> <p>Plan Transportation and Support</p> <p>You will not be able to drive immediately after surgery, so arrange for someone to take you home. Ideally, have a friend or family member assist you for at least the first day after the procedure.6. Fasting Instructions</p> <p>If sedation or anesthesia will be used, your doctor may instruct you not to eat or drink for several hours before surgery to prevent complications. Follow these timelines strictly.7. Avoid Eye Irritants</p> <p>Do not use eye makeup, face creams, or lotions on the day of surgery. Avoid environments with dust or smoke to prevent irritation or infection risk.8. Wear Comfortable Clothing</p> <p>On the surgery day, choose loose, comfortable clothing and avoid tops that need to be pulled over your head, as this could disturb the eye post-operation.9. Understand the Procedure and Risks</p> <p>Your surgeon will explain the process, benefits, risks, and recovery expectations. Take this opportunity to ask questions and address concerns so you feel confident and prepared.10. Follow All Instructions Carefully</p> <p>Every patient's situation is unique, so follow the specific guidelines your ophthalmologist gives</p> | <p>infection and a non-steroidal anti-inflammatory drug (NSAID) to control swelling. You usually start these drops a few days before the operation. Follow the dosing schedule strictly to prepare the eye environment.</p> <p><b>**The Night Before**</b></p> <p>Adhere strictly to fasting guidelines. Usually, this means eating or drinking nothing (including water) after midnight. An empty stomach prevents complications like aspiration during sedation. If you are diabetic, ask your doctor exactly how to manage your insulin or oral medication during the fasting period to avoid hypoglycemia.</p> <p><b>**The Morning of Surgery**</b></p> <p>* <b>**Hygiene:**</b></p> <p>Shower or bathe and wash your hair, as you may be advised to keep water out of your eye for a few days post-surgery. Do not wear makeup (especially mascara or eyeliner), face creams, lotions, perfume, or aftershave. These products can contaminate the sterile surgical field and increase infection risk.</p> <p>* <b>**Clothing:**</b> Wear loose, comfortable clothing. A button-down shirt is ideal because you will not have to pull it over your head, risking contact with your eye shield after the procedure. Leave all jewelry, watches, and valuables at home.</p> |
|--|--|--|------------------------------------------------------------------------------------------------------------------------------------------------------------------------------------------------------------------------------------------------------------------------------------------------------------------------------------------------------------------------------------------------------------------------------------------------------------------------------------------------------------------------------------------------------------------------------------------------------------------------------------------------------------------------------------------------------------------------------------------------------------------------------------------------------------------------------------------------------------------------------------------------------------------------------------------------------------------------------------------------------------------------------------------------------------------------------------------------------------------------------------------------------------------------------------|-------------------------------------------------------------------------------------------------------------------------------------------------------------------------------------------------------------------------------------------------------------------------------------------------------------------------------------------------------------------------------------------------------------------------------------------------------------------------------------------------------------------------------------------------------------------------------------------------------------------------------------------------------------------------------------------------------------------------------------------------------------------------------------------------------------------------------------------------------------------------------------------------------------------------------------------------------------------------------------------------------------------------------------------------------------------------------------------------------------------------------------------------------------------------------------------------------------------------------------------------------------------------------------------------------------------------------------------|-------------------------------------------------------------------------------------------------------------------------------------------------------------------------------------------------------------------------------------------------------------------------------------------------------------------------------------------------------------------------------------------------------------------------------------------------------------------------------------------------------------------------------------------------------------------------------------------------------------------------------------------------------------------------------------------------------------------------------------------------------------------------------------------------------------------------------------------------------------------------------------------------------------------------------------------------------------------------------------------------------------------------------------------------------------------------------------------------------------------------------------------------------------------------------------------------------------------------------------------------------------------------------|

|  |  |  |                                                                                                                                                                                                                                                                                                                                                                                                                                                                                                                                                                                                 |                                                                                                                                                                                                                                                            |                                                                                                                                                                                                                                                                                                                                                                                                                                                                                                                                                                                                                                                    |
|--|--|--|-------------------------------------------------------------------------------------------------------------------------------------------------------------------------------------------------------------------------------------------------------------------------------------------------------------------------------------------------------------------------------------------------------------------------------------------------------------------------------------------------------------------------------------------------------------------------------------------------|------------------------------------------------------------------------------------------------------------------------------------------------------------------------------------------------------------------------------------------------------------|----------------------------------------------------------------------------------------------------------------------------------------------------------------------------------------------------------------------------------------------------------------------------------------------------------------------------------------------------------------------------------------------------------------------------------------------------------------------------------------------------------------------------------------------------------------------------------------------------------------------------------------------------|
|  |  |  | <p>If in the days immediately before the planned surgery you are started on antibiotics by your GP or develop an infection anywhere in the body, such as:</p> <ul style="list-style-type: none"> <li>• A cough, cold or runny nose</li> <li>• A urinary tract infection</li> <li>• Diarrhoea and vomiting</li> <li>• A red or sticky eye</li> <li>• An infected wound or skin infection (cellulitis)</li> </ul> <p>Please contact us on the numbers at the end of this leaflet as we will not be able to proceed and will have to postpone your operation until the infection has resolved.</p> | <p>you. Doing so will help ensure the best possible surgical outcome.</p> <p>If you want, I can also give you a day-by-day cataract surgery preparation checklist so nothing is missed before your operation — would you like me to make that for you?</p> | <p>* <b>**Medications:**</b><br/>Take only the essential morning medications (such as heart or blood pressure pills) approved by your doctor with a tiny sip of water.</p> <p>* <b>**Transportation:**</b><br/>You are strictly prohibited from driving yourself home. The sedation and the procedure will impair your vision and reaction times. Arrange for a trusted friend or family member to drive you and, ideally, stay with you for the first few hours while the anesthesia wears off.</p> <p>Finally, if you develop a cold, fever, or eye infection in the days leading up to the surgery, contact the surgery center immediately.</p> |
|--|--|--|-------------------------------------------------------------------------------------------------------------------------------------------------------------------------------------------------------------------------------------------------------------------------------------------------------------------------------------------------------------------------------------------------------------------------------------------------------------------------------------------------------------------------------------------------------------------------------------------------|------------------------------------------------------------------------------------------------------------------------------------------------------------------------------------------------------------------------------------------------------------|----------------------------------------------------------------------------------------------------------------------------------------------------------------------------------------------------------------------------------------------------------------------------------------------------------------------------------------------------------------------------------------------------------------------------------------------------------------------------------------------------------------------------------------------------------------------------------------------------------------------------------------------------|

|                                              |                        |                                                             |                                                                                                                                                                                                                                                                                                                                                                                                                                                                                                                                                                                                                                                                                                                                                                                                                                                                                                                                                                                                                                                                                                             |                                                                                                                                                                                                                                                                                                                                                                                                                                                                                                                                                                                                                                                                                                                                                                                                                                                                                                                                                                                                                                                                                                                                                                                                                         |                                                                                                                                                                                                                                                                                                                                                                                                                                                                                                                                                                                                                                                                                                                                                                                                                                                                                                                                                                                                                                                                                                                                                                                                                                                                                                |
|----------------------------------------------|------------------------|-------------------------------------------------------------|-------------------------------------------------------------------------------------------------------------------------------------------------------------------------------------------------------------------------------------------------------------------------------------------------------------------------------------------------------------------------------------------------------------------------------------------------------------------------------------------------------------------------------------------------------------------------------------------------------------------------------------------------------------------------------------------------------------------------------------------------------------------------------------------------------------------------------------------------------------------------------------------------------------------------------------------------------------------------------------------------------------------------------------------------------------------------------------------------------------|-------------------------------------------------------------------------------------------------------------------------------------------------------------------------------------------------------------------------------------------------------------------------------------------------------------------------------------------------------------------------------------------------------------------------------------------------------------------------------------------------------------------------------------------------------------------------------------------------------------------------------------------------------------------------------------------------------------------------------------------------------------------------------------------------------------------------------------------------------------------------------------------------------------------------------------------------------------------------------------------------------------------------------------------------------------------------------------------------------------------------------------------------------------------------------------------------------------------------|------------------------------------------------------------------------------------------------------------------------------------------------------------------------------------------------------------------------------------------------------------------------------------------------------------------------------------------------------------------------------------------------------------------------------------------------------------------------------------------------------------------------------------------------------------------------------------------------------------------------------------------------------------------------------------------------------------------------------------------------------------------------------------------------------------------------------------------------------------------------------------------------------------------------------------------------------------------------------------------------------------------------------------------------------------------------------------------------------------------------------------------------------------------------------------------------------------------------------------------------------------------------------------------------|
| <p>What happens during cataract surgery?</p> | <p>Your operation.</p> | <p>Explain the operation (restrict answer to 297 words)</p> | <p>There will be a nurse with you throughout your operation to make sure you are comfortable. The operation is performed in the operating theatre and takes around 30 minutes. Most patients having cataract removal have the operation under local anaesthetic, which involves either drops on the eye or drops in combination with a small amount of local anaesthetic that is squirted around the eye using a tiny blunt tube. Your eye may remain numb for 2-6 hours, which may affect your vision. During the operation you will be asked to keep your head still and lie as flat as possible. A nurse will be with you holding your hand (if you wish) during the time you are having the anaesthetic and operation. The operation will involve covering your other eye with a paper drape. If you have significant claustrophobia please let us know prior to coming in for your surgery. The most common way to remove the cataract is by a technique called phacoemulsification . A small incision is made painlessly in the front of the eye and a tiny probe is passed through the incision.</p> | <p>Cataract surgery is a procedure to remove the eye's cloudy natural lens and replace it with a clear artificial lens, called an intraocular lens (IOL), to restore sharp vision. It is usually performed under local anesthesia, so you remain awake but pain-free.</p> <p>The most common method is phacoemulsification. After numbing the eye, the surgeon makes a tiny incision in the cornea. A small ultrasonic probe is inserted through the incision to break the cataract-affected lens into tiny fragments using gentle vibrations. These fragments are then suctioned out of the eye.</p> <p>Once the cloudy lens is removed, the surgeon places the folded IOL through the same small incision. The lens unfolds inside the eye and sits in the natural lens capsule, allowing light to focus clearly onto the retina again.</p> <p>In some cases, another method called extracapsular cataract extraction may be used, especially for very advanced cataracts. This involves making a slightly larger incision to remove the lens in one piece before inserting the IOL.</p> <p>The incision often seals naturally without stitches due to its small size in phacoemulsification, though stitches may</p> | <p>Cataract surgery is a highly successful outpatient procedure that typically lasts less than 20 minutes. It is usually performed on one eye at a time, spaced weeks apart if both eyes require treatment.</p> <p><b>**The Procedure**</b><br/>First, your eye is completely numbed using anesthetic drops or a local injection. You will remain awake during the surgery but will feel no pain; however, you may see light and movement. A mild sedative is often administered to help you relax. An instrument is gently applied to hold your eyelids open, preventing blinking.</p> <p>Looking through a specialized microscope, the surgeon makes a microscopic incision (about 2 to 3 millimeters) in the cornea, the clear front surface of the eye. Through this tiny opening, a technique called <b>**phacoemulsification**</b> is used. A small probe emitting ultrasound waves is inserted to break up the cloudy lens into tiny fragments, which are then gently vacuumed out. Crucially, the clear back membrane of the lens capsule is left intact to support the new lens.</p> <p><b>**Lens Implantation**</b><br/>Once the natural lens is removed, the surgeon inserts the artificial intraocular lens (IOL). This lens is flexible and folded to fit through the initial</p> |
|----------------------------------------------|------------------------|-------------------------------------------------------------|-------------------------------------------------------------------------------------------------------------------------------------------------------------------------------------------------------------------------------------------------------------------------------------------------------------------------------------------------------------------------------------------------------------------------------------------------------------------------------------------------------------------------------------------------------------------------------------------------------------------------------------------------------------------------------------------------------------------------------------------------------------------------------------------------------------------------------------------------------------------------------------------------------------------------------------------------------------------------------------------------------------------------------------------------------------------------------------------------------------|-------------------------------------------------------------------------------------------------------------------------------------------------------------------------------------------------------------------------------------------------------------------------------------------------------------------------------------------------------------------------------------------------------------------------------------------------------------------------------------------------------------------------------------------------------------------------------------------------------------------------------------------------------------------------------------------------------------------------------------------------------------------------------------------------------------------------------------------------------------------------------------------------------------------------------------------------------------------------------------------------------------------------------------------------------------------------------------------------------------------------------------------------------------------------------------------------------------------------|------------------------------------------------------------------------------------------------------------------------------------------------------------------------------------------------------------------------------------------------------------------------------------------------------------------------------------------------------------------------------------------------------------------------------------------------------------------------------------------------------------------------------------------------------------------------------------------------------------------------------------------------------------------------------------------------------------------------------------------------------------------------------------------------------------------------------------------------------------------------------------------------------------------------------------------------------------------------------------------------------------------------------------------------------------------------------------------------------------------------------------------------------------------------------------------------------------------------------------------------------------------------------------------------|

|  |  |  |                                                                                                                                                                                                                                                                                                                                                                                                                                                                                                                                                                                                                                                                                  |                                                                                                                                                                                                                                                                                                                                                                                                                                                                                                                                                                                                                                                                                                                                                                      |                                                                                                                                                                                                                                                                                                                                                                                                                                                                                                                                                                        |
|--|--|--|----------------------------------------------------------------------------------------------------------------------------------------------------------------------------------------------------------------------------------------------------------------------------------------------------------------------------------------------------------------------------------------------------------------------------------------------------------------------------------------------------------------------------------------------------------------------------------------------------------------------------------------------------------------------------------|----------------------------------------------------------------------------------------------------------------------------------------------------------------------------------------------------------------------------------------------------------------------------------------------------------------------------------------------------------------------------------------------------------------------------------------------------------------------------------------------------------------------------------------------------------------------------------------------------------------------------------------------------------------------------------------------------------------------------------------------------------------------|------------------------------------------------------------------------------------------------------------------------------------------------------------------------------------------------------------------------------------------------------------------------------------------------------------------------------------------------------------------------------------------------------------------------------------------------------------------------------------------------------------------------------------------------------------------------|
|  |  |  | <p>The probe breaks the cataract into very small pieces, which are then sucked out leaving the clear lens capsule.</p> <p>A plastic lens is then folded and passed through the incision into the lens capsule where it unfolds to its normal shape. The small incision usually heals itself, although occasionally a stitch is required. After the operation a pad or clear shield will be placed over your eye. Immediately after the operation your eye will look red and you will feel a gritty sensation. These symptoms are normal and can take up to 4 weeks to settle down. The vast majority of patients experience little or no pain during or after the operation.</p> | <p>occasionally be required in extracapsular surgery. The entire operation typically takes 15–30 minutes per eye.</p> <p>After surgery, a protective cover or shield is placed over the eye to keep it safe while healing begins. You'll rest briefly before going home the same day.</p> <p>Recovery is generally rapid, with vision improving within hours to days. You'll use prescribed eye drops to prevent infection and reduce inflammation, and avoid rubbing your eye. Strenuous activities should be limited for at least a week.</p> <p>Cataract surgery is one of the most successful and commonly performed operations worldwide, with a high rate of vision restoration and low risk of complications when done by an experienced ophthalmologist.</p> | <p>micro-incision. Once inside the lens capsule, it unfolds and settles permanently into the correct position to restore focus.</p> <p><b>**Closing**</b><br/>Finally, the instruments are removed. In the vast majority of cases, no stitches are required. The incision is "self-sealing," meaning the eye's natural internal pressure holds the wound closed while it heals. A protective shield is taped over your eye to prevent you from rubbing it while you sleep. You are then moved to a recovery area for a brief observation period before going home.</p> |
|--|--|--|----------------------------------------------------------------------------------------------------------------------------------------------------------------------------------------------------------------------------------------------------------------------------------------------------------------------------------------------------------------------------------------------------------------------------------------------------------------------------------------------------------------------------------------------------------------------------------------------------------------------------------------------------------------------------------|----------------------------------------------------------------------------------------------------------------------------------------------------------------------------------------------------------------------------------------------------------------------------------------------------------------------------------------------------------------------------------------------------------------------------------------------------------------------------------------------------------------------------------------------------------------------------------------------------------------------------------------------------------------------------------------------------------------------------------------------------------------------|------------------------------------------------------------------------------------------------------------------------------------------------------------------------------------------------------------------------------------------------------------------------------------------------------------------------------------------------------------------------------------------------------------------------------------------------------------------------------------------------------------------------------------------------------------------------|

## Charles Bonnet syndrome

|                                                                                                                                                                                                                           |                            |                     |                 |                     |                        |
|---------------------------------------------------------------------------------------------------------------------------------------------------------------------------------------------------------------------------|----------------------------|---------------------|-----------------|---------------------|------------------------|
| <b>Royal College of Ophthalmologist (RCOphth) Leaflet:</b>                                                                                                                                                                |                            |                     |                 |                     |                        |
| <a href="https://www.rcophth.ac.uk/wp-content/uploads/2024/06/Understanding-Visual-Hallucinations-CBS-2024.pdf">https://www.rcophth.ac.uk/wp-content/uploads/2024/06/Understanding-Visual-Hallucinations-CBS-2024.pdf</a> |                            |                     |                 |                     |                        |
| <b>NHS leaflet:</b>                                                                                                                                                                                                       |                            |                     |                 |                     |                        |
| <a href="https://mft.nhs.uk/app/uploads/sites/2/2018/05/REH-002-Charles-Bonnet-Syndrome-updated-1.pdf">https://mft.nhs.uk/app/uploads/sites/2/2018/05/REH-002-Charles-Bonnet-Syndrome-updated-1.pdf</a>                   |                            |                     |                 |                     |                        |
| <b>RCOphth leaflet section heading</b>                                                                                                                                                                                    | <b>NHS section heading</b> | <b>GenAI prompt</b> | <b>NHS text</b> | <b>GPT-5 output</b> | <b>Gemini 3 output</b> |

|                                         |                                             |                                                                               |                                                                                                                                                                                                                                                                                                                                                                                                                       |                                                                                                                                                                                                                                                                                                                                                                                                                                                |                                                                                                                                                                                                                                                                                                                                                                                                        |
|-----------------------------------------|---------------------------------------------|-------------------------------------------------------------------------------|-----------------------------------------------------------------------------------------------------------------------------------------------------------------------------------------------------------------------------------------------------------------------------------------------------------------------------------------------------------------------------------------------------------------------|------------------------------------------------------------------------------------------------------------------------------------------------------------------------------------------------------------------------------------------------------------------------------------------------------------------------------------------------------------------------------------------------------------------------------------------------|--------------------------------------------------------------------------------------------------------------------------------------------------------------------------------------------------------------------------------------------------------------------------------------------------------------------------------------------------------------------------------------------------------|
| <p>What is Charles Bonnet syndrome?</p> | <p>What is Charles Bonnet syndrome?</p>     | <p>What is Charles Bonnet syndrome? (limit your response to 64 words)</p>     | <p>Charles Bonnet Syndrome is the name given to explain the situation when people with sight problems start to see things that they know are not real. Sometimes called visual hallucinations, the things that people see can take all kinds of forms, from simple patterns of straight lines to detailed pictures of people or buildings. These images can be enjoyable, frightening and/or sometimes upsetting.</p> | <p>Charles Bonnet syndrome is a condition where visually impaired individuals experience vivid, complex visual hallucinations. These hallucinations are not caused by mental illness but result from the brain compensating for reduced visual input. People with the syndrome usually recognize the images aren't real, and the phenomenon is more common in elderly individuals with eye diseases like macular degeneration or glaucoma.</p> | <p>Charles Bonnet syndrome is a condition that causes vivid, complex visual hallucinations in people with significant vision loss. It occurs when the brain, deprived of visual input, generates its own images. Importantly, individuals with this syndrome are mentally healthy and typically understand that the hallucinations are not real. It is often associated with macular degeneration.</p> |
| <p>What causes CBS?</p>                 | <p>What causes Charles Bonnet Syndrome?</p> | <p>What causes Charles Bonnet Syndrome? (limit your response to 62 words)</p> | <p>When a person's sight is failing there are not as many signals being sent to the visual part of their brain. The under stimulated brain may start generating signals of its own to fill the gaps. This seems to happen more when people are sitting alone, somewhere quiet which is familiar to them, or when they are lying in bed at night.</p>                                                                  | <p>Charles Bonnet syndrome is caused by reduced visual input due to eye diseases such as macular degeneration, cataracts, or glaucoma. The brain, deprived of normal visual signals, compensates by generating images, leading to hallucinations. This is thought to be similar to "phantom limb" phenomena, where sensory deprivation triggers spontaneous neural activity in the corresponding brain regions.</p>                            | <p>Charles Bonnet Syndrome is caused by significant vision loss. When the brain stops receiving visual input from the eyes, the visual cortex becomes hyperactive. To compensate for this sensory deprivation, the brain generates its own images, creating phantom visions. It is most commonly triggered by conditions like age-related macular degeneration, glaucoma, and cataracts.</p>           |

|                                          |                                           |                                                                              |                                                                                                                                                                                                                                                                                                                                                                                                                                                                                                                                                                                                                                                |                                                                                                                                                                                                                                                                                                                                                                                                                                                                                                                                                                                                                                                                                                                                                    |                                                                                                                                                                                                                                                                                                                                                                                                                                                                                                                                                                                                                                                                                                                                               |
|------------------------------------------|-------------------------------------------|------------------------------------------------------------------------------|------------------------------------------------------------------------------------------------------------------------------------------------------------------------------------------------------------------------------------------------------------------------------------------------------------------------------------------------------------------------------------------------------------------------------------------------------------------------------------------------------------------------------------------------------------------------------------------------------------------------------------------------|----------------------------------------------------------------------------------------------------------------------------------------------------------------------------------------------------------------------------------------------------------------------------------------------------------------------------------------------------------------------------------------------------------------------------------------------------------------------------------------------------------------------------------------------------------------------------------------------------------------------------------------------------------------------------------------------------------------------------------------------------|-----------------------------------------------------------------------------------------------------------------------------------------------------------------------------------------------------------------------------------------------------------------------------------------------------------------------------------------------------------------------------------------------------------------------------------------------------------------------------------------------------------------------------------------------------------------------------------------------------------------------------------------------------------------------------------------------------------------------------------------------|
| <p>What kinds of things might I see?</p> | <p>What kind of things do people see?</p> | <p>What kind of things do people see? (limit your response to 108 words)</p> | <p>There seems to be two different kinds of things people see. Both of them may be in either black and white or colour, involve movement or stay still and may seem real. There may be hallucinations of patterns and lines which may look like mosaic, brickwork or tiles, or pictures of people and places. Often whole scenes will appear such as landscapes or groups of people, which are sometimes life size and other times tiny. These pictures may last for a few minutes or several hours. Many people begin to recognise similar things appearing in their visions such as distorted faces or the same tiny people in costumes.</p> | <p>In Charles Bonnet syndrome, hallucinations are purely visual and can vary widely in complexity and detail. Some people see simple patterns, shapes, or flashes of light, while others experience detailed images such as faces, animals, plants, buildings, or entire scenes. The images are often vivid and colorful, and they may appear static or move realistically. People might see miniature figures, distorted landscapes, or objects that seem out of place. These hallucinations typically last seconds to minutes, can recur often, and don't interact with the person. Importantly, sufferers usually recognize the visions as unreal, distinguishing them from hallucinations caused by psychiatric or neurological disorders.</p> | <p>People with Charles Bonnet Syndrome experience a wide variety of visual hallucinations, ranging from simple abstract patterns to intricate, photorealistic scenes. Common simple visions include geometric shapes, grids, brickwork patterns, or flashes of bright color. More complex hallucinations often involve seeing people, faces, or animals. These figures might appear in period costumes or wear hats. Sometimes the figures are tiny (Lilliputian) or have distorted features like enlarged eyes. Observers might also see landscapes, buildings, or vehicles. Notably, these images are strictly visual; they do not talk or produce sound. They can be static like a photograph or move fluidly across the visual field.</p> |
|------------------------------------------|-------------------------------------------|------------------------------------------------------------------------------|------------------------------------------------------------------------------------------------------------------------------------------------------------------------------------------------------------------------------------------------------------------------------------------------------------------------------------------------------------------------------------------------------------------------------------------------------------------------------------------------------------------------------------------------------------------------------------------------------------------------------------------------|----------------------------------------------------------------------------------------------------------------------------------------------------------------------------------------------------------------------------------------------------------------------------------------------------------------------------------------------------------------------------------------------------------------------------------------------------------------------------------------------------------------------------------------------------------------------------------------------------------------------------------------------------------------------------------------------------------------------------------------------------|-----------------------------------------------------------------------------------------------------------------------------------------------------------------------------------------------------------------------------------------------------------------------------------------------------------------------------------------------------------------------------------------------------------------------------------------------------------------------------------------------------------------------------------------------------------------------------------------------------------------------------------------------------------------------------------------------------------------------------------------------|

|                                        |                                                     |                                                                                        |                                                                                                                                                                                                                                                                                                                                                                                                                                                                                                                                                                                                                                                                                                                                                                                                                                                                                                                                                   |                                                                                                                                                                                                                                                                                                                                                                                                                                                                                                                                                                                                                                                                                                                                                                                                                                                                                                                                                                             |                                                                                                                                                                                                                                                                                                                                                                                                                                                                                                                                                                                                                                                                                                                                                                                                                                                                                                                                                                                                                   |
|----------------------------------------|-----------------------------------------------------|----------------------------------------------------------------------------------------|---------------------------------------------------------------------------------------------------------------------------------------------------------------------------------------------------------------------------------------------------------------------------------------------------------------------------------------------------------------------------------------------------------------------------------------------------------------------------------------------------------------------------------------------------------------------------------------------------------------------------------------------------------------------------------------------------------------------------------------------------------------------------------------------------------------------------------------------------------------------------------------------------------------------------------------------------|-----------------------------------------------------------------------------------------------------------------------------------------------------------------------------------------------------------------------------------------------------------------------------------------------------------------------------------------------------------------------------------------------------------------------------------------------------------------------------------------------------------------------------------------------------------------------------------------------------------------------------------------------------------------------------------------------------------------------------------------------------------------------------------------------------------------------------------------------------------------------------------------------------------------------------------------------------------------------------|-------------------------------------------------------------------------------------------------------------------------------------------------------------------------------------------------------------------------------------------------------------------------------------------------------------------------------------------------------------------------------------------------------------------------------------------------------------------------------------------------------------------------------------------------------------------------------------------------------------------------------------------------------------------------------------------------------------------------------------------------------------------------------------------------------------------------------------------------------------------------------------------------------------------------------------------------------------------------------------------------------------------|
| <p>Is there any treatment for CBS?</p> | <p>Is there a cure for Charles Bonnet syndrome?</p> | <p>Is there a cure for Charles Bonnet syndrome? (limit your response to 157 words)</p> | <p>Unfortunately there is no known cure or treatment for this condition. Frequently the visual hallucinations stop on their own in response to an improvement or further deterioration of vision. Knowing that it is poor vision and not a mental health illness that is causing these images often helps people to come to terms with them. It is worth trying some distraction techniques to change things when the visions occur to see if it will help them disappear. For example, if it happens in the dark then try switching a light on or if it happens in the light try switching the light off. Opening and closing the eyes, concentrating on something else or looking or walking away may help. Sometimes talking about your feelings can help. If you are experiencing Charles Bonnet syndrome, talking to someone like your GP or health professional such as optician or eye consultant may be a good way to find some help.</p> | <p>There is currently no definitive cure for Charles Bonnet syndrome, but symptoms can sometimes be reduced or managed. Since the hallucinations result from reduced visual input, improving vision through treatment of underlying eye conditions (e.g., cataract surgery, updated glasses) may help. For many, reassurance and education are key—knowing the hallucinations aren't a sign of mental illness often lessens anxiety. Some people find that blinking rapidly, moving their eyes, or briefly changing lighting conditions can interrupt episodes. In rare, distressing cases, medications such as antidepressants or anticonvulsants may be prescribed, although their effectiveness varies. Over time, hallucinations often decrease in frequency or intensity, and some individuals experience complete resolution as the brain adapts. Regular follow-up with an eye care professional and support groups can also improve coping and quality of life.</p> | <p>There is no specific medical cure for Charles Bonnet syndrome, but the condition often resolves on its own over time as the brain adapts to vision loss. Treatment primarily focuses on managing the underlying vision impairment; optimizing remaining sight or treating conditions like cataracts can sometimes stop the hallucinations.</p> <p>Coping strategies are highly recommended. Simple techniques such as rapid blinking, moving the eyes from left to right, or changing lighting conditions can help dispel visions when they occur. Reassurance is also critical, helping patients understand that the hallucinations are a side effect of vision loss rather than a mental health issue.</p> <p>In severe cases where hallucinations cause significant distress, doctors may prescribe medications like anticonvulsants or antidepressants. However, there is no standard drug therapy, and results vary. Ultimately, management relies on coping mechanisms and maximizing visual health.</p> |
|----------------------------------------|-----------------------------------------------------|----------------------------------------------------------------------------------------|---------------------------------------------------------------------------------------------------------------------------------------------------------------------------------------------------------------------------------------------------------------------------------------------------------------------------------------------------------------------------------------------------------------------------------------------------------------------------------------------------------------------------------------------------------------------------------------------------------------------------------------------------------------------------------------------------------------------------------------------------------------------------------------------------------------------------------------------------------------------------------------------------------------------------------------------------|-----------------------------------------------------------------------------------------------------------------------------------------------------------------------------------------------------------------------------------------------------------------------------------------------------------------------------------------------------------------------------------------------------------------------------------------------------------------------------------------------------------------------------------------------------------------------------------------------------------------------------------------------------------------------------------------------------------------------------------------------------------------------------------------------------------------------------------------------------------------------------------------------------------------------------------------------------------------------------|-------------------------------------------------------------------------------------------------------------------------------------------------------------------------------------------------------------------------------------------------------------------------------------------------------------------------------------------------------------------------------------------------------------------------------------------------------------------------------------------------------------------------------------------------------------------------------------------------------------------------------------------------------------------------------------------------------------------------------------------------------------------------------------------------------------------------------------------------------------------------------------------------------------------------------------------------------------------------------------------------------------------|

**Diabetic Eye Disease**

**Royal College of Ophthalmologist (RCOphth) Leaflet:**

[https://www.rcophth.ac.uk/wp-content/uploads/2023/09/Understanding\\_Diabetes\\_2023-1.pdf](https://www.rcophth.ac.uk/wp-content/uploads/2023/09/Understanding_Diabetes_2023-1.pdf)

**NHS leaflet:** <https://mft.nhs.uk/app/uploads/sites/2/2018/04/REH-163.pdf>

| <b>RCOphth leaflet section heading</b> | <b>NHS section heading</b>    | <b>GenAI prompt</b>                                                | <b>NHS text</b>                                                                                                                                                                                                                                                                                                                                             | <b>GPT-5 output</b>                                                                                                                                                                                                                                                                                                                | <b>Gemini 3 output</b>                                                                                                                                                                                                                                                                         |
|----------------------------------------|-------------------------------|--------------------------------------------------------------------|-------------------------------------------------------------------------------------------------------------------------------------------------------------------------------------------------------------------------------------------------------------------------------------------------------------------------------------------------------------|------------------------------------------------------------------------------------------------------------------------------------------------------------------------------------------------------------------------------------------------------------------------------------------------------------------------------------|------------------------------------------------------------------------------------------------------------------------------------------------------------------------------------------------------------------------------------------------------------------------------------------------|
| What is diabetic retinopathy?          | What is diabetic retinopathy? | What is diabetic retinopathy?<br>(limit your response to 59 words) | Blood vessels bring oxygen and nourishment to your retina. In diabetic retinopathy the blood vessels at the back of your eye may be damaged in a number of ways. This can affect your sight. This is known as diabetic retinopathy. Diabetic retinopathy progresses with time but may not cause symptoms until it is too late to give corrective treatment. | Diabetic retinopathy is an eye condition caused by damage to the blood vessels in the retina due to high blood sugar levels. It can lead to vision problems and blindness if untreated. Symptoms include blurred vision, floaters, and dark areas. Regular eye exams and blood sugar control help prevent or slow its progression. | Diabetic retinopathy is a diabetes complication that affects the eyes. It is caused by damage to the blood vessels in the retina, the light-sensitive tissue at the back of the eye. At first, it may cause no symptoms or only mild vision problems, but it can eventually lead to blindness. |

|                                                      |                                                  |                                                                                     |                                                                                                                                                                                                                                                                                                                                                                                                                                                                                                                                                                                                                                                                                                                                                                                                                                                                                                               |                                                                                                                                                                                                                                                                                                                                                                                                                                                                                                                                                                                                                                                                                                                                                                                                                                                                                                                                                                                                                                                                                                                                                                                                                |                                                                                                                                                                                                                                                                                                                                                                                                                                                                                                                                                                                                                                                                                                                                                                                                                                                                                                                                                                                                                                                                                                                                                                                                                                                                                                                                                                                                                                                                                       |
|------------------------------------------------------|--------------------------------------------------|-------------------------------------------------------------------------------------|---------------------------------------------------------------------------------------------------------------------------------------------------------------------------------------------------------------------------------------------------------------------------------------------------------------------------------------------------------------------------------------------------------------------------------------------------------------------------------------------------------------------------------------------------------------------------------------------------------------------------------------------------------------------------------------------------------------------------------------------------------------------------------------------------------------------------------------------------------------------------------------------------------------|----------------------------------------------------------------------------------------------------------------------------------------------------------------------------------------------------------------------------------------------------------------------------------------------------------------------------------------------------------------------------------------------------------------------------------------------------------------------------------------------------------------------------------------------------------------------------------------------------------------------------------------------------------------------------------------------------------------------------------------------------------------------------------------------------------------------------------------------------------------------------------------------------------------------------------------------------------------------------------------------------------------------------------------------------------------------------------------------------------------------------------------------------------------------------------------------------------------|---------------------------------------------------------------------------------------------------------------------------------------------------------------------------------------------------------------------------------------------------------------------------------------------------------------------------------------------------------------------------------------------------------------------------------------------------------------------------------------------------------------------------------------------------------------------------------------------------------------------------------------------------------------------------------------------------------------------------------------------------------------------------------------------------------------------------------------------------------------------------------------------------------------------------------------------------------------------------------------------------------------------------------------------------------------------------------------------------------------------------------------------------------------------------------------------------------------------------------------------------------------------------------------------------------------------------------------------------------------------------------------------------------------------------------------------------------------------------------------|
| <p>Sections under: What is diabetic retinopathy?</p> | <p>What does diabetic retinopathy look like?</p> | <p>What does diabetic retinopathy look like? (limit your response to 321 words)</p> | <p><b>Background retinopathy</b><br/>The earliest changes are called 'background retinopathy'. Small changes develop on the blood vessels and look like tiny red dots. These are called micro aneurysms. Larger red dots are the result of retinal haemorrhages and lie within the retina. Background retinopathy does not affect your sight and does not need treatment. However, you should make sure that you go for screening every year. As time goes by, your blood vessels may become constricted and the retina may become starved of oxygen and nutrition. Different signs can be seen in the retina at different stages. This progression can lead to 'pre-proliferative diabetic retinopathy'. Proliferative diabetic retinopathy<br/>At this stage you may develop new blood vessels on the retina. This is called 'proliferative diabetic retinopathy'. These new blood vessels are abnormal</p> | <p><b>Diabetic retinopathy</b> often develops gradually and can appear differently depending on its stage. In the early stage (non-proliferative diabetic retinopathy), small bulges in retinal blood vessels called microaneurysms may form. These can leak fluid or tiny amounts of blood, appearing as small red dots on the retina during an eye exam. You might also see pale or yellowish spots known as hard exudates, which are fatty deposits from leaking fluids.</p> <p>As the condition progresses, blood vessels can become blocked, causing areas of the retina to lose blood supply. These damaged zones may look darker or irregular compared to healthy tissue. Swelling in the central retina (macular edema) can make the retina appear thickened or distorted.</p> <p>In advanced stages (proliferative diabetic retinopathy), the retina responds to poor blood flow by growing abnormal new blood vessels on its surface. These fragile vessels may appear thin, irregular, and tangled. They often break easily, causing more bleeding into the eye's vitreous gel. Such bleeding may look like dark or cloudy patches and can significantly obscure vision. Scar tissue from these</p> | <p>From a patient's perspective, early diabetic retinopathy often looks like nothing at all; vision remains sharp despite internal damage. As the condition progresses, visual symptoms manifest as:</p> <ul style="list-style-type: none"> <li>* <b>**Floaters:**</b> Spots, dark strings, or cobwebs drifting across the field of vision.</li> <li>* <b>**Blurriness:**</b> General loss of focus or fluctuating clarity.</li> <li>* <b>**Dark Areas:**</b> Blank, shadow-like, or empty spots in the visual field.</li> <li>* <b>**Washed-out Colors:**</b> Difficulty distinguishing hues.</li> </ul> <p>To an ophthalmologist examining the retina (the back of the eye), the disease presents specific physical signs classified by severity:</p> <ul style="list-style-type: none"> <li><b>**Non-Proliferative Diabetic Retinopathy (NPDR)**</b></li> <li>*</li> <li><b>**Microaneurysms:**</b> The earliest sign, appearing as tiny, isolated red dots caused by ballooning capillaries.</li> <li>* <b>**Hemorrhages:**</b> Blood leaks into the retina. "Dot and blot" hemorrhages appear as round, deep red spots, while "flame" hemorrhages look like superficial streaks.</li> <li>* <b>**Hard Exudates:**</b> Yellow, waxy lipid deposits with sharp margins, often forming rings, caused by vessels leaking fluid.</li> <li>* <b>**Cotton Wool Spots:**</b> Fluffy, soft white patches that indicate areas of nerve damage due to lack of oxygen (ischemia).</li> </ul> |
|------------------------------------------------------|--------------------------------------------------|-------------------------------------------------------------------------------------|---------------------------------------------------------------------------------------------------------------------------------------------------------------------------------------------------------------------------------------------------------------------------------------------------------------------------------------------------------------------------------------------------------------------------------------------------------------------------------------------------------------------------------------------------------------------------------------------------------------------------------------------------------------------------------------------------------------------------------------------------------------------------------------------------------------------------------------------------------------------------------------------------------------|----------------------------------------------------------------------------------------------------------------------------------------------------------------------------------------------------------------------------------------------------------------------------------------------------------------------------------------------------------------------------------------------------------------------------------------------------------------------------------------------------------------------------------------------------------------------------------------------------------------------------------------------------------------------------------------------------------------------------------------------------------------------------------------------------------------------------------------------------------------------------------------------------------------------------------------------------------------------------------------------------------------------------------------------------------------------------------------------------------------------------------------------------------------------------------------------------------------|---------------------------------------------------------------------------------------------------------------------------------------------------------------------------------------------------------------------------------------------------------------------------------------------------------------------------------------------------------------------------------------------------------------------------------------------------------------------------------------------------------------------------------------------------------------------------------------------------------------------------------------------------------------------------------------------------------------------------------------------------------------------------------------------------------------------------------------------------------------------------------------------------------------------------------------------------------------------------------------------------------------------------------------------------------------------------------------------------------------------------------------------------------------------------------------------------------------------------------------------------------------------------------------------------------------------------------------------------------------------------------------------------------------------------------------------------------------------------------------|

|  |  |  |                                                                                                                                                                                                                                                                                                                                                                                                                                                                                                                                                                                                                                                                                                                                                                                                                                                                                                                                                                                                                          |                                                                                                                                                                                                                                                                                                                                                                                                                                                                                                                                                                                                                                                                                                                                                                                                                                                                                                                     |                                                                                                                                                                                                                                                                                                                                                                                                                                                                                                                                                                                                                                                                                                                                                                                                                                                                                                                       |
|--|--|--|--------------------------------------------------------------------------------------------------------------------------------------------------------------------------------------------------------------------------------------------------------------------------------------------------------------------------------------------------------------------------------------------------------------------------------------------------------------------------------------------------------------------------------------------------------------------------------------------------------------------------------------------------------------------------------------------------------------------------------------------------------------------------------------------------------------------------------------------------------------------------------------------------------------------------------------------------------------------------------------------------------------------------|---------------------------------------------------------------------------------------------------------------------------------------------------------------------------------------------------------------------------------------------------------------------------------------------------------------------------------------------------------------------------------------------------------------------------------------------------------------------------------------------------------------------------------------------------------------------------------------------------------------------------------------------------------------------------------------------------------------------------------------------------------------------------------------------------------------------------------------------------------------------------------------------------------------------|-----------------------------------------------------------------------------------------------------------------------------------------------------------------------------------------------------------------------------------------------------------------------------------------------------------------------------------------------------------------------------------------------------------------------------------------------------------------------------------------------------------------------------------------------------------------------------------------------------------------------------------------------------------------------------------------------------------------------------------------------------------------------------------------------------------------------------------------------------------------------------------------------------------------------|
|  |  |  | <p>and fragile. By themselves, these blood vessels do not cause symptoms or vision loss. However, they have thin fragile walls. At this stage your sight is at risk as the vessels may bleed or may develop scar tissue. This can pull the retina away from the underlying layers of the eye, causing a 'traction retinal detachment'.</p> <p>Diabetic maculopathy<br/>You may also suffer from two different types of change to the blood vessels in the macula. This is called 'diabetic maculopathy'.</p> <p>The commonest change is that the blood vessels become leaky. Fats and fluid that are normally carried along in the bloodstream may then leak into the macula. Fats that have leaked into the retina are called 'exudates'.</p> <p>Leaking fluid causes water logging in the retina and is called 'oedema'.</p> <p>Oedema at the centre of the macula will cause you to lose some sight and you may require laser treatment. Occasionally, the blood vessels in the macula become so constricted that</p> | <p>abnormal vessels can pull on the retina, sometimes leading to retinal detachment, which appears as a lifted or wrinkled area.</p> <p>To the person with diabetic retinopathy, early changes are often invisible visually but may cause mild blurring. In advanced cases, they might perceive floating shapes (floaters), dark spots, faded colors, or areas of vision loss.</p> <p>On retinal photographs from an ophthalmologist, diabetic retinopathy may show distinct red hemorrhage spots, yellow exudates, cotton wool spots (white, fluffy patches from nerve fiber damage), and networks of abnormal vessels. The overall appearance depends on severity, but the hallmark signs include evidence of blood vessel leakage, blockage, and abnormal growth.</p> <p>Would you like me to create a medical-illustration style image of how diabetic retinopathy appears to the eye and on retinal scans?</p> | <p><b>**Proliferative Diabetic Retinopathy (PDR)**</b><br/>This advanced stage is defined by <b>**neovascularization**</b>—the growth of abnormal, fragile new blood vessels.</p> <p>* <b>**New Vessels:**</b><br/>These appear as fine, chaotic, wispy networks growing on the optic disc or elsewhere on the retina.</p> <p>* <b>**Vitreous Hemorrhage:**</b><br/>Because new vessels are weak, they often rupture, leaking blood into the vitreous gel. This looks like a red haze or clot obscuring the view of the retina.</p> <p>* <b>**Fibrosis:**</b> Scar tissue may grow alongside new vessels, appearing as white bands that can pull on the retina, potentially causing retinal detachment.</p> <p>Additionally, <b>**Diabetic Macular Edema**</b> can occur at any stage, appearing as a thickening of the central retina, often surrounded by yellow exudates, directly threatening central vision.</p> |
|--|--|--|--------------------------------------------------------------------------------------------------------------------------------------------------------------------------------------------------------------------------------------------------------------------------------------------------------------------------------------------------------------------------------------------------------------------------------------------------------------------------------------------------------------------------------------------------------------------------------------------------------------------------------------------------------------------------------------------------------------------------------------------------------------------------------------------------------------------------------------------------------------------------------------------------------------------------------------------------------------------------------------------------------------------------|---------------------------------------------------------------------------------------------------------------------------------------------------------------------------------------------------------------------------------------------------------------------------------------------------------------------------------------------------------------------------------------------------------------------------------------------------------------------------------------------------------------------------------------------------------------------------------------------------------------------------------------------------------------------------------------------------------------------------------------------------------------------------------------------------------------------------------------------------------------------------------------------------------------------|-----------------------------------------------------------------------------------------------------------------------------------------------------------------------------------------------------------------------------------------------------------------------------------------------------------------------------------------------------------------------------------------------------------------------------------------------------------------------------------------------------------------------------------------------------------------------------------------------------------------------------------------------------------------------------------------------------------------------------------------------------------------------------------------------------------------------------------------------------------------------------------------------------------------------|

|                                  |                                                     |                                                                                        |                                                                                                                                                                                                                                                                                                                                                                                                                                                                                                                                                                                                                                                                                                                                                                                                                                                         |                                                                                                                                                                                                                                                                                                                                                                                                                                                                                                                                                                                                                                                                                                                                                                                                                                                                                                                                                                  |                                                                                                                                                                                                                                                                                                                                                                                                                                                                                                                                                                                                                                                                                                                                                                                                                                                                                                                                                                                                                                          |
|----------------------------------|-----------------------------------------------------|----------------------------------------------------------------------------------------|---------------------------------------------------------------------------------------------------------------------------------------------------------------------------------------------------------------------------------------------------------------------------------------------------------------------------------------------------------------------------------------------------------------------------------------------------------------------------------------------------------------------------------------------------------------------------------------------------------------------------------------------------------------------------------------------------------------------------------------------------------------------------------------------------------------------------------------------------------|------------------------------------------------------------------------------------------------------------------------------------------------------------------------------------------------------------------------------------------------------------------------------------------------------------------------------------------------------------------------------------------------------------------------------------------------------------------------------------------------------------------------------------------------------------------------------------------------------------------------------------------------------------------------------------------------------------------------------------------------------------------------------------------------------------------------------------------------------------------------------------------------------------------------------------------------------------------|------------------------------------------------------------------------------------------------------------------------------------------------------------------------------------------------------------------------------------------------------------------------------------------------------------------------------------------------------------------------------------------------------------------------------------------------------------------------------------------------------------------------------------------------------------------------------------------------------------------------------------------------------------------------------------------------------------------------------------------------------------------------------------------------------------------------------------------------------------------------------------------------------------------------------------------------------------------------------------------------------------------------------------------|
|                                  |                                                     |                                                                                        | the macula is starved of oxygen and nutrition, causing your sight to get worse. This is called 'ischaemic maculopathy' and it does not usually respond to any type of treatment.                                                                                                                                                                                                                                                                                                                                                                                                                                                                                                                                                                                                                                                                        |                                                                                                                                                                                                                                                                                                                                                                                                                                                                                                                                                                                                                                                                                                                                                                                                                                                                                                                                                                  |                                                                                                                                                                                                                                                                                                                                                                                                                                                                                                                                                                                                                                                                                                                                                                                                                                                                                                                                                                                                                                          |
| How can diabetes affect my eyes? | What are the complications of diabetic retinopathy? | What are the complications of diabetic retinopathy? (limit your response to 176 words) | <p>Temporary blurring<br/>The unusual changes in blood sugar levels resulting from diabetes can affect the lens inside the eye. This can result in blurring of vision which comes and goes across the day. This blurring may be one of the first symptoms of diabetes although it may also occur at any time when your diabetes is not well controlled. Once your diabetes is controlled most people find this variable blurring goes away.</p> <p>Cataracts<br/>Cataracts are more common in people with diabetes than the rest of the population and may also occur at an earlier age in people with diabetes than others. A cataract is cloudiness in the lens of the eye which causes the vision to become cloudy, blurred or dim and faded. This is usually treatable.</p> <p>Glaucoma<br/>A person with diabetes is nearly twice as likely to</p> | <p>Complications of diabetic retinopathy can be severe and may lead to permanent vision loss if untreated.1. Vision loss: Progressive damage may cause partial or complete blindness.2. Macular edema: Swelling in the macula leads to blurred or distorted central vision.3. Vitreous hemorrhage: Fragile abnormal vessels can bleed into the vitreous gel, causing sudden vision obscuration.4. Retinal detachment: Scar tissue from abnormal vessels may pull on the retina, detaching it and creating severe vision impairment.5. Neovascular glaucoma: New vessels growing near the eye's drainage system can block fluid outflow, raising eye pressure and damaging the optic nerve.6. Increased risk of other eye diseases: People with retinopathy have a higher chance of cataracts and glaucoma.</p> <p>These complications often develop in advanced stages, making early detection and strict control of blood sugar levels, blood pressure, and</p> | <p>Diabetic retinopathy can progress to severe complications that permanently damage vision:</p> <p>* **Vitreous Hemorrhage:** In proliferative retinopathy, fragile new blood vessels grow and bleed into the vitreous humor (the clear gel filling the center of the eye). Mild bleeding causes dark floaters, while severe bleeding can fill the vitreous cavity and completely block vision.</p> <p>* **Retinal Detachment:** The growth of new blood vessels often stimulates scar tissue formation. This scar tissue can contract and pull the retina away from the back of the eye. Retinal detachment causes flashes of light, severe vision loss, and requires emergency surgery.</p> <p>* **Neovascular Glaucoma:** Abnormal blood vessels may grow onto the iris (the colored part of the eye), blocking the normal outflow of fluid. This causes eye pressure to rise rapidly, damaging the optic nerve. This condition is painful and a major cause of blindness.</p> <p>* **Blindness:** Without timely treatment, the</p> |

|                                                         |                        |                                                                       |                                                                                                                                                                                                                                                                                                                                                                                                                                                                                                                                                                     |                                                                                                                                                                                                                                                                                                                                                                                                                                                                                                                                                                                                                                                                                                                                      |                                                                                                                                                                                                                                                                                                                                                                                                                                                                                                                                                                                                                                                                                                                        |
|---------------------------------------------------------|------------------------|-----------------------------------------------------------------------|---------------------------------------------------------------------------------------------------------------------------------------------------------------------------------------------------------------------------------------------------------------------------------------------------------------------------------------------------------------------------------------------------------------------------------------------------------------------------------------------------------------------------------------------------------------------|--------------------------------------------------------------------------------------------------------------------------------------------------------------------------------------------------------------------------------------------------------------------------------------------------------------------------------------------------------------------------------------------------------------------------------------------------------------------------------------------------------------------------------------------------------------------------------------------------------------------------------------------------------------------------------------------------------------------------------------|------------------------------------------------------------------------------------------------------------------------------------------------------------------------------------------------------------------------------------------------------------------------------------------------------------------------------------------------------------------------------------------------------------------------------------------------------------------------------------------------------------------------------------------------------------------------------------------------------------------------------------------------------------------------------------------------------------------------|
|                                                         |                        |                                                                       | <p>get glaucoma as another adult. Glaucoma is a condition where pressure within the eye causes damage to the optic nerve and so impairs vision or causes blindness. This is usually treatable with eye drops or surgery.</p>                                                                                                                                                                                                                                                                                                                                        | <p>cholesterol essential for prevention. Regular dilated eye exams help identify changes before vision is severely affected.</p> <p>Do you want me to make a clear diagram showing these complications visually?</p>                                                                                                                                                                                                                                                                                                                                                                                                                                                                                                                 | <p>cumulative damage from hemorrhage, detachment, and glaucoma can result in total, irreversible blindness.</p>                                                                                                                                                                                                                                                                                                                                                                                                                                                                                                                                                                                                        |
| <p>Can I reduce the risk of developing retinopathy?</p> | <p>Dos and Don'ts.</p> | <p>What are the Dos and Don'ts? (limit your response to 90 words)</p> | <p>Diabetic retinopathy can get worse over time, but the following measures can help you to reduce your risks of developing diabetic retinopathy and to slow the progress of sight threatening retinopathy. Control your blood glucose as effectively as possible. See your family doctor regularly to check that your blood pressure is not raised. Keep your regular screening appointment. Get advice if you have a problem with your sight. For your eyes and general health, you should also have your cholesterol levels checked regularly and not smoke.</p> | <p>Dos:</p> <ul style="list-style-type: none"> <li>- Maintain stable blood sugar, blood pressure, and cholesterol.</li> <li>- Get regular dilated eye exams.</li> <li>- Eat a balanced diet rich in fruits, vegetables, and whole grains.</li> <li>- Exercise regularly as advised.</li> <li>- Take prescribed medications consistently.</li> </ul> <p>Don'ts:</p> <ul style="list-style-type: none"> <li>- Ignore vision changes or skip eye check-ups.</li> <li>- Smoke or use tobacco.</li> <li>- Delay diabetes management.</li> <li>- Overconsume sugary or high-fat foods.</li> <li>- Expose eyes to strain without breaks.</li> </ul> <p>Would you like me to create an easy-to-read infographic of these Dos and Don'ts?</p> | <p>**Dos:**</p> <ul style="list-style-type: none"> <li>* **Control ABCs:** Manage **A**<sup>1c</sup> (blood sugar), **B**lood pressure, and **C**holesterol tightly.</li> <li>* **Get Screened:** Attend annual dilated eye exams, even if your vision seems perfect.</li> <li>* **Live Healthy:** Exercise regularly and eat a balanced diet.</li> </ul> <p>**Don'ts:**</p> <ul style="list-style-type: none"> <li>* **Don't Smoke:** It severely damages blood vessels and accelerates disease.</li> <li>* **Don't Wait:** Never wait for blurry vision to seek help; early damage is often symptomless.</li> <li>* **Don't Ignore Changes:** Report sudden floaters, flashes, or dark spots immediately.</li> </ul> |

|                                                 |                                            |                                                                                           |                                                                                                                                                                                                                                                                                                                                                                                                                                                                                                                                                                                                                                                                                                                                                                                                                                                                                                                                                                                                                     |                                                                                                                                                                                                                                                                                                                                                                                                                                                                                                                                                                                                                                                                                                                                                                                                                                                                                                                                                                                                                                                                                                                                    |                                                                                                                                                                                                                                                                                                                                                                                                                                                                                                                                                                                                                                                                                                                                                                                                                                                                                                                                                                                                                                                                                                                                                                                                                                                                                             |
|-------------------------------------------------|--------------------------------------------|-------------------------------------------------------------------------------------------|---------------------------------------------------------------------------------------------------------------------------------------------------------------------------------------------------------------------------------------------------------------------------------------------------------------------------------------------------------------------------------------------------------------------------------------------------------------------------------------------------------------------------------------------------------------------------------------------------------------------------------------------------------------------------------------------------------------------------------------------------------------------------------------------------------------------------------------------------------------------------------------------------------------------------------------------------------------------------------------------------------------------|------------------------------------------------------------------------------------------------------------------------------------------------------------------------------------------------------------------------------------------------------------------------------------------------------------------------------------------------------------------------------------------------------------------------------------------------------------------------------------------------------------------------------------------------------------------------------------------------------------------------------------------------------------------------------------------------------------------------------------------------------------------------------------------------------------------------------------------------------------------------------------------------------------------------------------------------------------------------------------------------------------------------------------------------------------------------------------------------------------------------------------|---------------------------------------------------------------------------------------------------------------------------------------------------------------------------------------------------------------------------------------------------------------------------------------------------------------------------------------------------------------------------------------------------------------------------------------------------------------------------------------------------------------------------------------------------------------------------------------------------------------------------------------------------------------------------------------------------------------------------------------------------------------------------------------------------------------------------------------------------------------------------------------------------------------------------------------------------------------------------------------------------------------------------------------------------------------------------------------------------------------------------------------------------------------------------------------------------------------------------------------------------------------------------------------------|
| <p>How can diabetic retinopathy be treated?</p> | <p>Treatment for diabetic retinopathy.</p> | <p>What is the treatment for diabetic retinopathy? (limit your response to 295 words)</p> | <p>If you develop proliferative retinopathy or your eye specialist thinks you are very close to developing it you will be advised to have laser treatment. The aim of laser treatment is to prevent bleeding or to prevent the growth of new blood vessels. The laser can be used in two ways: Localised laser treatment When individual vessels or small groups of vessels are leaking, the laser can seal them. This stops the bleeding and helps reduce the swelling of the retina. Panretinal laser treatment If new vessel growth (neo-vascularisation) has been detected you may need more extensive laser treatment. The aim is to treat large areas of the peripheral retina with the laser. This treatment stops the retina from producing the growth factors that stimulate new blood vessels to grow. If the treatment is successful, the new vessels shrink and disappear over a few months. Effect on your vision after the laser treatment When large areas of the peripheral retina are lasered,</p> | <p>Treatment for diabetic retinopathy depends on its stage and severity, aiming to slow or stop progression and prevent vision loss. 1. Blood sugar, blood pressure, and cholesterol control: The foundation of treatment is managing diabetes and related health factors to reduce further retinal damage. Lifestyle changes, medications, and regular monitoring are essential. 2. Medical monitoring: In early, mild cases (non-proliferative diabetic retinopathy), frequent eye exams—usually every 6–12 months—are performed to track changes before intervention is required. 3. Laser therapy (photocoagulation): For more advanced cases, focal laser treatment seals leaking blood vessels, while panretinal photocoagulation reduces abnormal vessel growth. This can slow disease progression and lower the risk of severe vision loss. 4. Anti-VEGF injections: Medications such as ranibizumab, aflibercept, or bevacizumab are injected into the eye to block vascular endothelial growth factor (VEGF), reducing abnormal blood vessel growth and swelling (macular edema). 5. Steroid injections or implants:</p> | <p>Treatment depends largely on the stage of the disease and whether diabetic macular edema is present.</p> <p><b>**Early-Stage Management**</b><br/>For mild to moderate non-proliferative diabetic retinopathy, specific eye treatments are often unnecessary. The strategy involves <b>**monitoring**</b> and <b>**systemic control**</b>. Tightly managing blood sugar, blood pressure, and cholesterol is crucial, as this can slow progression and sometimes reverse early vessel damage.</p> <p><b>**Advanced-Stage Treatments**</b><br/>Once the disease advances to proliferative diabetic retinopathy or causes macular edema, active intervention is required to prevent blindness:</p> <p>* <b>**Anti-VEGF Injections:**</b> This is the most common treatment. Medications (such as aflibercept, bevacizumab, or ranibizumab) are injected into the eye to block the protein responsible for abnormal vessel growth. These injections reverse swelling and stop new vessels from forming.</p> <p>* <b>**Corticosteroids:**</b> If anti-VEGF drugs are ineffective, steroid implants or injections can be used to suppress inflammation and swelling, though they carry a risk of increasing eye pressure or causing cataracts.</p> <p>* <b>**Laser Photocoagulation:**</b></p> |
|-------------------------------------------------|--------------------------------------------|-------------------------------------------------------------------------------------------|---------------------------------------------------------------------------------------------------------------------------------------------------------------------------------------------------------------------------------------------------------------------------------------------------------------------------------------------------------------------------------------------------------------------------------------------------------------------------------------------------------------------------------------------------------------------------------------------------------------------------------------------------------------------------------------------------------------------------------------------------------------------------------------------------------------------------------------------------------------------------------------------------------------------------------------------------------------------------------------------------------------------|------------------------------------------------------------------------------------------------------------------------------------------------------------------------------------------------------------------------------------------------------------------------------------------------------------------------------------------------------------------------------------------------------------------------------------------------------------------------------------------------------------------------------------------------------------------------------------------------------------------------------------------------------------------------------------------------------------------------------------------------------------------------------------------------------------------------------------------------------------------------------------------------------------------------------------------------------------------------------------------------------------------------------------------------------------------------------------------------------------------------------------|---------------------------------------------------------------------------------------------------------------------------------------------------------------------------------------------------------------------------------------------------------------------------------------------------------------------------------------------------------------------------------------------------------------------------------------------------------------------------------------------------------------------------------------------------------------------------------------------------------------------------------------------------------------------------------------------------------------------------------------------------------------------------------------------------------------------------------------------------------------------------------------------------------------------------------------------------------------------------------------------------------------------------------------------------------------------------------------------------------------------------------------------------------------------------------------------------------------------------------------------------------------------------------------------|

|  |  |  |                                                                                                                                                                                                                                                                                                                                                                                                                                                                                                                                                                                                                                                                                                                                                                                                                                                                      |                                                                                                                                                                                                                                                                                                                                                                                                                                                                                                                                                                                                                                                                                                                                                                                                                                                                               |                                                                                                                                                                                                                                                                                                                                                                                                                                                                                                                                                                                                                                                                                                                                                                                                                           |
|--|--|--|----------------------------------------------------------------------------------------------------------------------------------------------------------------------------------------------------------------------------------------------------------------------------------------------------------------------------------------------------------------------------------------------------------------------------------------------------------------------------------------------------------------------------------------------------------------------------------------------------------------------------------------------------------------------------------------------------------------------------------------------------------------------------------------------------------------------------------------------------------------------|-------------------------------------------------------------------------------------------------------------------------------------------------------------------------------------------------------------------------------------------------------------------------------------------------------------------------------------------------------------------------------------------------------------------------------------------------------------------------------------------------------------------------------------------------------------------------------------------------------------------------------------------------------------------------------------------------------------------------------------------------------------------------------------------------------------------------------------------------------------------------------|---------------------------------------------------------------------------------------------------------------------------------------------------------------------------------------------------------------------------------------------------------------------------------------------------------------------------------------------------------------------------------------------------------------------------------------------------------------------------------------------------------------------------------------------------------------------------------------------------------------------------------------------------------------------------------------------------------------------------------------------------------------------------------------------------------------------------|
|  |  |  | <p>the effects on your vision may be significant and your peripheral vision may be quite poor. This may affect your ability to drive safely. Night and colour vision may also be affected.</p> <p>Intravitreal injection<br/>If you have diabetic maculopathy then your doctor may offer an injection which reduces macular oedema and may improve vision.</p> <p>Surgery<br/>If you have vitreous hemorrhages, or scar tissue causing retinal detachment, it may be possible for you to have an operation called a vitrectomy. A separate leaflet on the vitrectomy is also available which contains further information in more detail.</p> <p>If you have a cataract then surgery is offered to remove the lens of your eye which is replaced with a synthetic lens implant.</p> <p>If you have glaucoma then drops may be given to control the eye pressure.</p> | <p>Used when other treatments aren't sufficient, these help decrease inflammation and reduce macular swelling.<sup>6</sup></p> <p>Vitrectomy surgery:<br/>In cases with significant vitreous hemorrhage or retinal detachment, vitrectomy removes the bloody or scarred vitreous gel, allowing repair of retinal damage and stabilization of vision.<sup>7</sup> Ongoing follow-up:<br/>Even after treatment, regular eye exams are critical, as retinopathy can recur or progress. Managing diabetes effectively remains the most important step in preserving sight.</p> <p>Early detection and prompt treatment greatly improve outcomes, often preventing blindness.</p> <p>Would you like me to prepare a stage-by-stage visual guide showing when each treatment is typically used for diabetic retinopathy? That could make it much easier to understand visually.</p> | <p>* **Scatter (Panretinal) Laser:**<br/>Used for proliferative retinopathy. The doctor creates thousands of tiny laser burns in the peripheral retina. This causes abnormal blood vessels to shrink and scar over.</p> <p>* **Focal Laser:**<br/>Seals specific leaking blood vessels to reduce swelling (less common now due to anti-VEGF therapy).</p> <p>* **Vitrectomy:**<br/>This is a surgery performed in an operating room for severe cases. If blood fills the vitreous gel (vitreous hemorrhage) and does not clear, or if the retina detaches, a surgeon removes the vitreous humor and replaces it with a saline solution, gas, or oil bubble to reattach the retina.</p> <p>While these treatments are effective at stopping vision loss, they cannot always restore vision that has already been lost.</p> |
|--|--|--|----------------------------------------------------------------------------------------------------------------------------------------------------------------------------------------------------------------------------------------------------------------------------------------------------------------------------------------------------------------------------------------------------------------------------------------------------------------------------------------------------------------------------------------------------------------------------------------------------------------------------------------------------------------------------------------------------------------------------------------------------------------------------------------------------------------------------------------------------------------------|-------------------------------------------------------------------------------------------------------------------------------------------------------------------------------------------------------------------------------------------------------------------------------------------------------------------------------------------------------------------------------------------------------------------------------------------------------------------------------------------------------------------------------------------------------------------------------------------------------------------------------------------------------------------------------------------------------------------------------------------------------------------------------------------------------------------------------------------------------------------------------|---------------------------------------------------------------------------------------------------------------------------------------------------------------------------------------------------------------------------------------------------------------------------------------------------------------------------------------------------------------------------------------------------------------------------------------------------------------------------------------------------------------------------------------------------------------------------------------------------------------------------------------------------------------------------------------------------------------------------------------------------------------------------------------------------------------------------|

|                           |                                            |                                                                            |                                                                                                                                                                                                                                                                                                                                                |                                                                                                                                                                                                                                                                                                                                                                                                 |                                                                                                                                                                                                                                                                                                                                                                                       |
|---------------------------|--------------------------------------------|----------------------------------------------------------------------------|------------------------------------------------------------------------------------------------------------------------------------------------------------------------------------------------------------------------------------------------------------------------------------------------------------------------------------------------|-------------------------------------------------------------------------------------------------------------------------------------------------------------------------------------------------------------------------------------------------------------------------------------------------------------------------------------------------------------------------------------------------|---------------------------------------------------------------------------------------------------------------------------------------------------------------------------------------------------------------------------------------------------------------------------------------------------------------------------------------------------------------------------------------|
| Further help and support. | What if my sight cannot be fully restored? | What if my sight cannot be fully restored? (limit my response to 57 words) | Much can be done to help you use your remaining vision. You should ask your eye specialist or optometrist about low vision aids. If your vision is impaired, it is also worth asking your specialist to help you register as "sight impaired" or "severely sight impaired". This opens the door to expert help and some financial concessions. | If your sight cannot be fully restored, focus on preserving remaining vision and adapting daily activities. Low-vision aids, such as magnifiers and special glasses, can help. Vision rehabilitation programs teach coping strategies. Emotional support, healthy lifestyle choices, and ongoing monitoring are important for maintaining independence and quality of life despite vision loss. | If significant vision loss is permanent, low vision rehabilitation is essential. Specialists can teach you to use adaptive devices like high-powered magnifiers and screen readers to maintain independence. Crucially, continue managing your diabetes and attending eye exams to protect your remaining sight. Support groups can also help you navigate these changes emotionally. |
|---------------------------|--------------------------------------------|----------------------------------------------------------------------------|------------------------------------------------------------------------------------------------------------------------------------------------------------------------------------------------------------------------------------------------------------------------------------------------------------------------------------------------|-------------------------------------------------------------------------------------------------------------------------------------------------------------------------------------------------------------------------------------------------------------------------------------------------------------------------------------------------------------------------------------------------|---------------------------------------------------------------------------------------------------------------------------------------------------------------------------------------------------------------------------------------------------------------------------------------------------------------------------------------------------------------------------------------|

## Dry Eye

|                                                                                                                                                                                       |                            |                     |                 |                     |                        |
|---------------------------------------------------------------------------------------------------------------------------------------------------------------------------------------|----------------------------|---------------------|-----------------|---------------------|------------------------|
| <b>Royal College of Ophthalmologist (RCOphth) Leaflet:</b>                                                                                                                            |                            |                     |                 |                     |                        |
| <a href="https://www.rcophth.ac.uk/wp-content/uploads/2020/05/Understanding-Dry-Eye_2017.pdf">https://www.rcophth.ac.uk/wp-content/uploads/2020/05/Understanding-Dry-Eye_2017.pdf</a> |                            |                     |                 |                     |                        |
| <b>NHS leaflet:</b> <a href="https://mft.nhs.uk/app/uploads/sites/2/2018/05/REH-094-Dry-Eyes.pdf">https://mft.nhs.uk/app/uploads/sites/2/2018/05/REH-094-Dry-Eyes.pdf</a>             |                            |                     |                 |                     |                        |
| <b>RCOphth leaflet section heading</b>                                                                                                                                                | <b>NHS section heading</b> | <b>GenAI prompt</b> | <b>NHS text</b> | <b>GPT-5 output</b> | <b>Gemini 3 output</b> |

|                         |                         |                                                            |                                                                                                                                                                                                                                                                                                                                                                                                                                                                                                                                                                                                                                                                                                                                                                                         |                                                                                                                                                                                                                                                                                                                                                                                                                                                                                                                                                                                                                                                                                                                                                                                                                                                                          |                                                                                                                                                                                                                                                                                                                                                                                                                                                                                                                                                                                                                                                                                                                                                                                                                                                                                                                                                                       |
|-------------------------|-------------------------|------------------------------------------------------------|-----------------------------------------------------------------------------------------------------------------------------------------------------------------------------------------------------------------------------------------------------------------------------------------------------------------------------------------------------------------------------------------------------------------------------------------------------------------------------------------------------------------------------------------------------------------------------------------------------------------------------------------------------------------------------------------------------------------------------------------------------------------------------------------|--------------------------------------------------------------------------------------------------------------------------------------------------------------------------------------------------------------------------------------------------------------------------------------------------------------------------------------------------------------------------------------------------------------------------------------------------------------------------------------------------------------------------------------------------------------------------------------------------------------------------------------------------------------------------------------------------------------------------------------------------------------------------------------------------------------------------------------------------------------------------|-----------------------------------------------------------------------------------------------------------------------------------------------------------------------------------------------------------------------------------------------------------------------------------------------------------------------------------------------------------------------------------------------------------------------------------------------------------------------------------------------------------------------------------------------------------------------------------------------------------------------------------------------------------------------------------------------------------------------------------------------------------------------------------------------------------------------------------------------------------------------------------------------------------------------------------------------------------------------|
| <p>What is dry eye?</p> | <p>What is dry eye?</p> | <p>What is dry eye? (limit your response to 136 words)</p> | <p>You have been diagnosed as having dry eye/s. This means that your eyes may not be making enough tears or that the tears which you are making are of a poor quality. Although this may sound like a minor condition – if not managed appropriately can significantly impact your quality of life. The normal function of the tears is to keep the surface of the eye wet and nourished, so any shortage of tears or reduction in their quality can make your eyes feel sore, gritty or as if they are burning. Your eyes may appear red or “bloodshot” particularly in the mornings and evenings. Dry eye/s can be associated with ageing and once the ability to produce quality tears is lost it rarely returns. It can also be linked with other conditions such as arthritis.</p> | <p>Dry eye is a condition where your eyes don't produce enough tears or the tears evaporate too quickly, leading to inadequate lubrication. This can cause discomfort, burning, stinging, redness, blurry vision, and a gritty or sandy feeling. It may result from aging, environmental factors (like wind or dry climates), prolonged screen use, certain medications, or medical conditions such as autoimmune diseases. Tears are essential for maintaining eye health, washing away debris, and providing clear vision. When tear quantity or quality is compromised, the eyes become more vulnerable to irritation and inflammation. Treatment depends on the cause and may include artificial tears, lifestyle changes, or managing underlying health issues. Early intervention can help prevent chronic discomfort and potential damage to the eye surface.</p> | <p>Dry eye disease is a common condition occurring when your tears cannot provide adequate lubrication for your eyes. This happens due to insufficient tear production or poor-quality tears, leading to inflammation and surface damage. Common symptoms include stinging, burning, scratchy sensations, redness, light sensitivity, and blurred vision. Surprisingly, watery eyes can also be a symptom as the eyes try to overcompensate for dryness.</p> <p>Factors contributing to dry eye include aging, medical conditions like Sjögren's syndrome or diabetes, medications, and environmental triggers like wind or smoke. Extensive screen use is a growing cause due to reduced blinking. Treatment options range from over-the-counter artificial tears and lifestyle changes to prescription medications and procedures designed to unblock oil glands or conserve tears. Unmanaged, it can lead to eye infections and damage to the corneal surface.</p> |
|-------------------------|-------------------------|------------------------------------------------------------|-----------------------------------------------------------------------------------------------------------------------------------------------------------------------------------------------------------------------------------------------------------------------------------------------------------------------------------------------------------------------------------------------------------------------------------------------------------------------------------------------------------------------------------------------------------------------------------------------------------------------------------------------------------------------------------------------------------------------------------------------------------------------------------------|--------------------------------------------------------------------------------------------------------------------------------------------------------------------------------------------------------------------------------------------------------------------------------------------------------------------------------------------------------------------------------------------------------------------------------------------------------------------------------------------------------------------------------------------------------------------------------------------------------------------------------------------------------------------------------------------------------------------------------------------------------------------------------------------------------------------------------------------------------------------------|-----------------------------------------------------------------------------------------------------------------------------------------------------------------------------------------------------------------------------------------------------------------------------------------------------------------------------------------------------------------------------------------------------------------------------------------------------------------------------------------------------------------------------------------------------------------------------------------------------------------------------------------------------------------------------------------------------------------------------------------------------------------------------------------------------------------------------------------------------------------------------------------------------------------------------------------------------------------------|

|                                           |                               |                                                                  |                                                                                                                                                                                                                                                                                                                                                                                                                                                                                                                                                                                                                                                                            |                                                                                                                                                                                                                                                                                                                                                                                                                                                                                                                                                                                                                                                                                                                                                    |                                                                                                                                                                                                                                                                                                                                                                                                                                                                                                                                                                                                                                                                                                                                                                                                                  |
|-------------------------------------------|-------------------------------|------------------------------------------------------------------|----------------------------------------------------------------------------------------------------------------------------------------------------------------------------------------------------------------------------------------------------------------------------------------------------------------------------------------------------------------------------------------------------------------------------------------------------------------------------------------------------------------------------------------------------------------------------------------------------------------------------------------------------------------------------|----------------------------------------------------------------------------------------------------------------------------------------------------------------------------------------------------------------------------------------------------------------------------------------------------------------------------------------------------------------------------------------------------------------------------------------------------------------------------------------------------------------------------------------------------------------------------------------------------------------------------------------------------------------------------------------------------------------------------------------------------|------------------------------------------------------------------------------------------------------------------------------------------------------------------------------------------------------------------------------------------------------------------------------------------------------------------------------------------------------------------------------------------------------------------------------------------------------------------------------------------------------------------------------------------------------------------------------------------------------------------------------------------------------------------------------------------------------------------------------------------------------------------------------------------------------------------|
| <p>What is the treatment for dry eye?</p> | <p>What is the treatment?</p> | <p>What is the treatment? (limit your response to 112 words)</p> | <p>Dry eye/s is treated with artificial tears and sometimes lubricating ointment. Artificial tear drops can moisten your eyes and relieve discomfort. The doctor or nurse practitioner will advise you on how frequently you will need to use your drops. Initially this may be every hour or more frequently. If your eyes dry out during the night, you may find it difficult to open them in the morning and your eyelids may stick together. Using a lubricating ointment on your eyes before you go to bed may help; the doctor or nurse practitioner will advise you. Your treatment must be used regularly. If you stop using it, your symptoms will come back.</p> | <p>Treatment depends on cause and severity. First-line: regular artificial tears (preservative-free), ointments or gels at night, eyelid hygiene and warm compresses for meibomian gland dysfunction. Prescription options: topical anti-inflammatories (cyclosporine, lifitegrast), short-term steroid drops, or autologous serum for severe cases. Procedures: punctal plugs to reduce drainage, thermal pulsation or intense pulsed light to treat meibomian glands, and scleral lenses for surface protection. Lifestyle changes: humidifiers, screen breaks and blink exercises, adjust medications that cause dryness, and omega-3 supplements may help. Treat underlying disease (e.g., blepharitis, autoimmune) with targeted therapy.</p> | <p>Treatment aims to restore or maintain the tear film. Mild cases often respond to over-the-counter artificial tears, gels, and ointments. For persistent symptoms, prescription eye drops like cyclosporine or lifitegrast help increase tear production and reduce inflammation.</p> <p>Procedural options include punctal plugs to block tear drainage or thermal pulsation therapies to unblock oil glands. Lifestyle adjustments are equally important: apply warm compresses, practice eyelid hygiene, use a humidifier, and follow the 20-20-20 rule during screen use. In severe cases, scleral contact lenses or autologous serum drops derived from the patient's blood may be necessary to protect the ocular surface. Treating underlying eyelid conditions like blepharitis is also essential.</p> |
|-------------------------------------------|-------------------------------|------------------------------------------------------------------|----------------------------------------------------------------------------------------------------------------------------------------------------------------------------------------------------------------------------------------------------------------------------------------------------------------------------------------------------------------------------------------------------------------------------------------------------------------------------------------------------------------------------------------------------------------------------------------------------------------------------------------------------------------------------|----------------------------------------------------------------------------------------------------------------------------------------------------------------------------------------------------------------------------------------------------------------------------------------------------------------------------------------------------------------------------------------------------------------------------------------------------------------------------------------------------------------------------------------------------------------------------------------------------------------------------------------------------------------------------------------------------------------------------------------------------|------------------------------------------------------------------------------------------------------------------------------------------------------------------------------------------------------------------------------------------------------------------------------------------------------------------------------------------------------------------------------------------------------------------------------------------------------------------------------------------------------------------------------------------------------------------------------------------------------------------------------------------------------------------------------------------------------------------------------------------------------------------------------------------------------------------|

|                                                         |                                                               |                                                                                                         |                                                                                                                                                                                                                                                                                                                                                                                                                                                                                                                                                                                                                                                                                                                                                                                                                                                                                                                                                                                                       |                                                                                                                                                                                                                                                                                                                                                                                                                                                                                                                                                                                                                                                                                                                                                                                                                                                                                                                                                                                                                                                                       |                                                                                                                                                                                                                                                                                                                                                                                                                                                                                                                                                                                                                                                                                                                                                                                                                                                                                                                                                                                                                                                                                                                     |
|---------------------------------------------------------|---------------------------------------------------------------|---------------------------------------------------------------------------------------------------------|-------------------------------------------------------------------------------------------------------------------------------------------------------------------------------------------------------------------------------------------------------------------------------------------------------------------------------------------------------------------------------------------------------------------------------------------------------------------------------------------------------------------------------------------------------------------------------------------------------------------------------------------------------------------------------------------------------------------------------------------------------------------------------------------------------------------------------------------------------------------------------------------------------------------------------------------------------------------------------------------------------|-----------------------------------------------------------------------------------------------------------------------------------------------------------------------------------------------------------------------------------------------------------------------------------------------------------------------------------------------------------------------------------------------------------------------------------------------------------------------------------------------------------------------------------------------------------------------------------------------------------------------------------------------------------------------------------------------------------------------------------------------------------------------------------------------------------------------------------------------------------------------------------------------------------------------------------------------------------------------------------------------------------------------------------------------------------------------|---------------------------------------------------------------------------------------------------------------------------------------------------------------------------------------------------------------------------------------------------------------------------------------------------------------------------------------------------------------------------------------------------------------------------------------------------------------------------------------------------------------------------------------------------------------------------------------------------------------------------------------------------------------------------------------------------------------------------------------------------------------------------------------------------------------------------------------------------------------------------------------------------------------------------------------------------------------------------------------------------------------------------------------------------------------------------------------------------------------------|
| <p>Is there anything I can do to help with dry eye?</p> | <p>Lifestyle changes linked to improvements in dry eye/s.</p> | <p>Suggest lifestyle changes linked to improvements in dry eye/s (limit your response to 167 words)</p> | <p>Stopping smoking or vaping, taking Omega-3 supplements, reducing screen time or taking regular screen breaks can make a difference in your condition. Warm compresses and lid hygiene can also promote healthy production of the oily element of your tears. Try to avoid dry, dusty or smoky places as these make dry eyes worse. Using room humidifiers may help. Occasionally the dryness is very severe and treatment with drops and ointment does not work. There are other treatments available. You should ask the doctor or nurse treating you or ask your GP to refer you to a consultant ophthalmologist. Take your eye drops with you if you are going away from home. Always keep a spare bottle so that you do not run out. It is important that you use a new bottle of eye drops or ointment every 4 weeks, even if the bottle or tube is not empty. This helps to prevent contamination and possible infection. Please remember to wash your hands before and after treatment.</p> | <p>Try these changes that often improve symptoms:</p> <ul style="list-style-type: none"> <li>- Take regular screen breaks (20-20-20): every 20 minutes look 20 feet away for 20 seconds and blink fully.</li> <li>- Do blink exercises and conscious slow blinking during screen use.</li> <li>- Use a room humidifier and avoid direct air streams from fans, AC, or heaters.</li> <li>- Position screens slightly below eye level and increase font size to reduce wide-open staring.</li> <li>- Wear wraparound sunglasses or moisture goggles in wind or bright conditions.</li> <li>- Stay well hydrated and eat omega-3-rich foods (fatty fish, flaxseed) or discuss supplements with your clinician.</li> <li>- Practice daily eyelid hygiene and warm compresses for meibomian gland health.</li> <li>- Limit contact-lens wear when symptomatic and use preservative-free rewetting drops.</li> <li>- Stop smoking and avoid secondhand smoke.</li> <li>- Review medications with your doctor that may worsen dryness and have regular eye exams.</li> </ul> | <p>Making specific lifestyle adjustments can significantly alleviate dry eye symptoms. First, modify your environment: use a humidifier to add moisture to the air, especially in winter, and avoid directing fans, heaters, or air conditioners straight toward your face. Protection from irritants like cigarette smoke and wind is crucial; wearing wraparound sunglasses outdoors helps shield the eyes effectively.</p> <p>Hydration is vital; drink plenty of water throughout the day. Incorporating Omega-3 fatty acids into your diet through oily fish, walnuts, or flaxseed supplements can improve the oil quality in your tears.</p> <p>Digital habits play a major role. Practice the 20-20-20 rule: every 20 minutes, look at something 20 feet away for 20 seconds. Make a conscious effort to blink frequently and fully. Position your computer monitor slightly below eye level; this minimizes the eyelid opening, thereby reducing tear evaporation. Finally, maintain eyelid hygiene by applying warm compresses daily to unclog oil glands and removing makeup thoroughly before sleep.</p> |
|---------------------------------------------------------|---------------------------------------------------------------|---------------------------------------------------------------------------------------------------------|-------------------------------------------------------------------------------------------------------------------------------------------------------------------------------------------------------------------------------------------------------------------------------------------------------------------------------------------------------------------------------------------------------------------------------------------------------------------------------------------------------------------------------------------------------------------------------------------------------------------------------------------------------------------------------------------------------------------------------------------------------------------------------------------------------------------------------------------------------------------------------------------------------------------------------------------------------------------------------------------------------|-----------------------------------------------------------------------------------------------------------------------------------------------------------------------------------------------------------------------------------------------------------------------------------------------------------------------------------------------------------------------------------------------------------------------------------------------------------------------------------------------------------------------------------------------------------------------------------------------------------------------------------------------------------------------------------------------------------------------------------------------------------------------------------------------------------------------------------------------------------------------------------------------------------------------------------------------------------------------------------------------------------------------------------------------------------------------|---------------------------------------------------------------------------------------------------------------------------------------------------------------------------------------------------------------------------------------------------------------------------------------------------------------------------------------------------------------------------------------------------------------------------------------------------------------------------------------------------------------------------------------------------------------------------------------------------------------------------------------------------------------------------------------------------------------------------------------------------------------------------------------------------------------------------------------------------------------------------------------------------------------------------------------------------------------------------------------------------------------------------------------------------------------------------------------------------------------------|

**Glaucoma**

**Royal College of Ophthalmologist (RCOphth) Leaflet:**

<https://www.rcophth.ac.uk/wp-content/uploads/2023/06/Understanding-Glaucoma-2023.pdf>

**NHS leaflet:** <https://mft.nhs.uk/app/uploads/sites/2/2020/03/REH-205.pdf>;

<https://mft.nhs.uk/app/uploads/sites/2/2018/04/REH-063.pdf>;

<https://mft.nhs.uk/app/uploads/sites/2/2019/09/REH-174.pdf>

| <b>RCOphth leaflet section heading</b> | <b>NHS section heading</b> | <b>GenAI prompt</b> | <b>NHS text</b> | <b>GPT-5 output</b> | <b>Gemini 3 output</b> |
|----------------------------------------|----------------------------|---------------------|-----------------|---------------------|------------------------|
|----------------------------------------|----------------------------|---------------------|-----------------|---------------------|------------------------|

|          |                       |                                                               |                                                                                                                                                                                                                                                                                                                                                                                                                                                                                                                                                                                                                                                                                                                                                                                                                                                                                                                                                                                                                                                                                                                                                                                                                                                                                  |                                                                                                                                                                                                                                                                                                                                                                                                                                                                                                                                                                                                                                                                                                                                                                                                                                                                                                                                                                                                                                                                                                              |                                                                                                                                                                                                                                                                                                                                                                                                                                                                                                                                                                                                                                                                                                                                                                                                                                                                                                                                                                                                                                                                                                                                                                                                                                                                              |
|----------|-----------------------|---------------------------------------------------------------|----------------------------------------------------------------------------------------------------------------------------------------------------------------------------------------------------------------------------------------------------------------------------------------------------------------------------------------------------------------------------------------------------------------------------------------------------------------------------------------------------------------------------------------------------------------------------------------------------------------------------------------------------------------------------------------------------------------------------------------------------------------------------------------------------------------------------------------------------------------------------------------------------------------------------------------------------------------------------------------------------------------------------------------------------------------------------------------------------------------------------------------------------------------------------------------------------------------------------------------------------------------------------------|--------------------------------------------------------------------------------------------------------------------------------------------------------------------------------------------------------------------------------------------------------------------------------------------------------------------------------------------------------------------------------------------------------------------------------------------------------------------------------------------------------------------------------------------------------------------------------------------------------------------------------------------------------------------------------------------------------------------------------------------------------------------------------------------------------------------------------------------------------------------------------------------------------------------------------------------------------------------------------------------------------------------------------------------------------------------------------------------------------------|------------------------------------------------------------------------------------------------------------------------------------------------------------------------------------------------------------------------------------------------------------------------------------------------------------------------------------------------------------------------------------------------------------------------------------------------------------------------------------------------------------------------------------------------------------------------------------------------------------------------------------------------------------------------------------------------------------------------------------------------------------------------------------------------------------------------------------------------------------------------------------------------------------------------------------------------------------------------------------------------------------------------------------------------------------------------------------------------------------------------------------------------------------------------------------------------------------------------------------------------------------------------------|
| Driving. | Driving and glaucoma. | Can I drive with glaucoma? (limit your response to 235 words) | <p>Most people are still able to drive.</p> <p>To continue to drive, people must meet 2 standards:</p> <ol style="list-style-type: none"> <li>1. Central vision.</li> <li>2. Peripheral vision (edges of vision).</li> </ol> <p>Stricter standards apply for heavy goods drivers/bus or coach drivers.</p> <p>What can happen to peripheral vision in glaucoma?</p> <p>Glaucoma damages the edges of vision (peripheral vision) first and can often go unnoticed for some time.</p> <p>Danger comes, especially in driving when the damaged areas in each eye overlap.</p> <p>The brain will insert the missing parts of the 'picture' from memory.</p> <p>The driver is not aware that this is happening.</p> <p>When to inform the DVLA</p> <p>It is a legal requirement to inform DVLA if you have been diagnosed with glaucoma (with visual field defects) in both eyes.</p> <p>Ask your Doctor if you are not sure about your diagnosis.</p> <p>Fill out a V1 form and send to DVLA.</p> <p>You don't need to inform the DVLA if:</p> <ul style="list-style-type: none"> <li>You are diagnosed with ocular hypertension (raised eye pressure without any field loss).</li> <li>You are diagnosed with glaucoma in one eye (and the other eye has normal vision).</li> </ul> | <p>Yes, many people with glaucoma can still drive, especially in the early stages, but it depends on how much the condition has affected your vision. Glaucoma damages the optic nerve and can cause loss of peripheral vision, making it harder to detect movement or hazards from the side. Over time, it may also reduce contrast sensitivity and night vision, which can impact driving safety.</p> <p>Whether you can safely drive depends on:</p> <ul style="list-style-type: none"> <li>- Stage of glaucoma: Mild cases may have minimal impact, while advanced cases can cause significant vision loss.</li> <li>- Visual field test results: If your peripheral vision is severely reduced, you may not meet legal driving standards in your area.</li> <li>- Light conditions: Driving at night or in low-light settings can be more challenging due to glare and reduced contrast sensitivity.</li> <li>- Speed and complexity of the driving environment: High-speed roads or heavy traffic may be more difficult to navigate with visual limitations.</li> </ul> <p>Doctors often recommend</p> | <p>Yes, you can often drive with glaucoma, especially in the early stages, but it depends entirely on the severity of your vision loss. Since glaucoma typically damages peripheral (side) vision first, you may retain 20/20 central vision while developing dangerous blind spots. This "tunnel vision" makes it difficult to see cars changing lanes, merging traffic, or pedestrians entering the road.</p> <p>To drive legally, you must meet your local Department of Motor Vehicles (DMV) standards regarding visual acuity and field of vision. If your peripheral vision has narrowed significantly, you may fail the vision screening required for licensure.</p> <p>Depending on your condition, you might face restrictions, such as:</p> <ul style="list-style-type: none"> <li>* **Daytime-only driving:** Glaucoma often reduces contrast sensitivity, making night driving hazardous.</li> <li>* **Corrective lenses:** You must wear glasses or contacts.</li> <li>* **Special mirrors:** Installing extra mirrors to compensate for side vision loss.</li> </ul> <p>It is crucial to consult your ophthalmologist specifically about your fitness to drive. They can perform a visual field test to map your blind spots. If you find yourself missing</p> |
|----------|-----------------------|---------------------------------------------------------------|----------------------------------------------------------------------------------------------------------------------------------------------------------------------------------------------------------------------------------------------------------------------------------------------------------------------------------------------------------------------------------------------------------------------------------------------------------------------------------------------------------------------------------------------------------------------------------------------------------------------------------------------------------------------------------------------------------------------------------------------------------------------------------------------------------------------------------------------------------------------------------------------------------------------------------------------------------------------------------------------------------------------------------------------------------------------------------------------------------------------------------------------------------------------------------------------------------------------------------------------------------------------------------|--------------------------------------------------------------------------------------------------------------------------------------------------------------------------------------------------------------------------------------------------------------------------------------------------------------------------------------------------------------------------------------------------------------------------------------------------------------------------------------------------------------------------------------------------------------------------------------------------------------------------------------------------------------------------------------------------------------------------------------------------------------------------------------------------------------------------------------------------------------------------------------------------------------------------------------------------------------------------------------------------------------------------------------------------------------------------------------------------------------|------------------------------------------------------------------------------------------------------------------------------------------------------------------------------------------------------------------------------------------------------------------------------------------------------------------------------------------------------------------------------------------------------------------------------------------------------------------------------------------------------------------------------------------------------------------------------------------------------------------------------------------------------------------------------------------------------------------------------------------------------------------------------------------------------------------------------------------------------------------------------------------------------------------------------------------------------------------------------------------------------------------------------------------------------------------------------------------------------------------------------------------------------------------------------------------------------------------------------------------------------------------------------|

|  |  |  |                                                                                                                                                                                                                                                                                                                                            |                                                                                                                                                                                                                                                                                                                                                                                                                                                                                                                                                                              |                                                                                                                                                                                                        |
|--|--|--|--------------------------------------------------------------------------------------------------------------------------------------------------------------------------------------------------------------------------------------------------------------------------------------------------------------------------------------------|------------------------------------------------------------------------------------------------------------------------------------------------------------------------------------------------------------------------------------------------------------------------------------------------------------------------------------------------------------------------------------------------------------------------------------------------------------------------------------------------------------------------------------------------------------------------------|--------------------------------------------------------------------------------------------------------------------------------------------------------------------------------------------------------|
|  |  |  | <p>What happens when you inform the DVLA?<br/> The DVLA will usually write to request information about your condition from your eye doctor. The DVLA may arrange for a field test to be carried out at an approved centre. The test is performed with both eyes open and differs slightly from the test you have at the eye hospital.</p> | <p>regular vision testing and may advise limiting driving to daylight hours if night vision is impaired. Some countries or states require periodic visual field exams to maintain your driver's license.</p> <p>If you notice difficulty seeing pedestrians, cyclists, or vehicles approaching from the side, it's important to re-evaluate your driving safety. Discuss your situation with your eye specialist—they can provide guidance based on your test results and local regulations.</p> <p>Do you want me to share specific driving tips for glaucoma patients?</p> | <p>street signs, getting surprised by other cars, or feeling anxious behind the wheel, you should stop driving and seek a professional assessment immediately. Safety must always be the priority.</p> |
|--|--|--|--------------------------------------------------------------------------------------------------------------------------------------------------------------------------------------------------------------------------------------------------------------------------------------------------------------------------------------------|------------------------------------------------------------------------------------------------------------------------------------------------------------------------------------------------------------------------------------------------------------------------------------------------------------------------------------------------------------------------------------------------------------------------------------------------------------------------------------------------------------------------------------------------------------------------------|--------------------------------------------------------------------------------------------------------------------------------------------------------------------------------------------------------|

|                           |                                |                                                                                   |                                                                                                                                                                                                                                                                                                                                                                                                                                                                                                                                                                                                                                                                                                                                                                                                                                                                                                                                                                                                                                                                                                                                                                                         |                                                                                                                                                                                                                                                                                                                                                                                                                                                                                                                                                                                                                                                                                                                                                                                                                                                                                                                                                                                                                                                                                          |                                                                                                                                                                                                                                                                                                                                                                                                                                                                                                                                                                                                                                                                                                                                                                                                                                                                                                                                                                                                                                                                                                                                                                                                                                                                                                  |
|---------------------------|--------------------------------|-----------------------------------------------------------------------------------|-----------------------------------------------------------------------------------------------------------------------------------------------------------------------------------------------------------------------------------------------------------------------------------------------------------------------------------------------------------------------------------------------------------------------------------------------------------------------------------------------------------------------------------------------------------------------------------------------------------------------------------------------------------------------------------------------------------------------------------------------------------------------------------------------------------------------------------------------------------------------------------------------------------------------------------------------------------------------------------------------------------------------------------------------------------------------------------------------------------------------------------------------------------------------------------------|------------------------------------------------------------------------------------------------------------------------------------------------------------------------------------------------------------------------------------------------------------------------------------------------------------------------------------------------------------------------------------------------------------------------------------------------------------------------------------------------------------------------------------------------------------------------------------------------------------------------------------------------------------------------------------------------------------------------------------------------------------------------------------------------------------------------------------------------------------------------------------------------------------------------------------------------------------------------------------------------------------------------------------------------------------------------------------------|--------------------------------------------------------------------------------------------------------------------------------------------------------------------------------------------------------------------------------------------------------------------------------------------------------------------------------------------------------------------------------------------------------------------------------------------------------------------------------------------------------------------------------------------------------------------------------------------------------------------------------------------------------------------------------------------------------------------------------------------------------------------------------------------------------------------------------------------------------------------------------------------------------------------------------------------------------------------------------------------------------------------------------------------------------------------------------------------------------------------------------------------------------------------------------------------------------------------------------------------------------------------------------------------------|
| <p>Lifestyle factors.</p> | <p>Lifestyle and Glaucoma.</p> | <p>What lifestyle factors affect glaucoma? (limit your response to 286 words)</p> | <p>Emotional feelings<br/>Share your fears and feelings.<br/>Talk with others who have glaucoma.<br/>Avoid stress.<br/>Exercise<br/>Aerobic exercise for 20 minutes, 3-4 times per week may reduce intraocular pressure.<br/>Take care with:<br/>Yoga/Pilates – avoid head stances or inverted positions.<br/>Weight lifting – holding breath and straining raises pressure.<br/>Scuba diving – consult Ophthalmologist.<br/>If you have visual field loss take care e.g. when cycling or playing ball sports.<br/>Diet<br/>Can drink coffee, tea, cola (caffeine drinks).<br/>Drink small amounts of fluids over the day.<br/>Small amounts of alcohol are ok.<br/>Maintain a well-balanced diet.<br/>Vitamin B1 &amp; B12 and antioxidants may help nerve protection.<br/>Eskimos who have a diet that includes fresh water fish, cod, salmon, tuna, sardines (rich in Omega 3 oils) have been shown to have low rates of open angle glaucoma.<br/>Gingko Biloba helps blood flow.<br/>Smoking<br/>There is no evidence that smoking is a risk factor for glaucoma, however: Older smokers have higher risk of developing increased intraocular pressure compared to non-smokers.</p> | <p>Several lifestyle factors can influence glaucoma risk and progression, although the primary cause remains elevated intraocular pressure (IOP) and optic nerve damage. Paying attention to these factors may help preserve vision and support overall eye health:<br/>1. Physical Activity<br/>Regular moderate exercise (like walking or swimming) may help lower IOP and improve blood flow to the optic nerve. However, activities involving inverted positions (certain yoga poses) can temporarily increase eye pressure.<br/>2. Diet &amp; Nutrition<br/>A balanced diet rich in antioxidants (from leafy greens, fruits, and colorful vegetables) supports optic nerve health. Omega-3 fatty acids from fish may benefit eye circulation. Excess caffeine can cause short-term rises in IOP, so moderation is important.<br/>3. Hydration Habits<br/>Drinking small amounts of water throughout the day is better than consuming large volumes at once, which can temporarily elevate eye pressure.<br/>4. Sleep Quality &amp; Position<br/>Poor sleep or sleeping with the</p> | <p>While lifestyle choices cannot cure glaucoma or replace medication, certain habits can significantly influence intraocular pressure (IOP) and overall optic nerve health.<br/><b>**Exercise**</b> Regular, moderate aerobic exercise—such as walking, swimming, or cycling—can effectively lower eye pressure. However, specific forms of exertion can be harmful. Avoid heavy weightlifting that involves straining or holding your breath (the Valsalva maneuver). Furthermore, inverted yoga poses like headstands or handstands should be avoided, as they cause a dramatic spike in IOP.<br/><b>**Diet and Nutrition**</b> A diet rich in leafy green vegetables (spinach, kale) and nitrates is linked to a lower risk of glaucoma progression. Antioxidant-rich fruits and vegetables support the optic nerve. Maintaining a healthy weight is also important, as a high BMI and metabolic syndrome are associated with elevated eye pressure.<br/><b>**Fluid Intake and Caffeine**</b> Hydration is vital, but <b>*how*</b> you drink matters. Consuming a large volume of liquid (a quart or more) within a few minutes can cause a rapid, temporary increase in eye pressure. It is safer to sip fluids throughout the day. Excessive caffeine intake can also cause short-term</p> |
|---------------------------|--------------------------------|-----------------------------------------------------------------------------------|-----------------------------------------------------------------------------------------------------------------------------------------------------------------------------------------------------------------------------------------------------------------------------------------------------------------------------------------------------------------------------------------------------------------------------------------------------------------------------------------------------------------------------------------------------------------------------------------------------------------------------------------------------------------------------------------------------------------------------------------------------------------------------------------------------------------------------------------------------------------------------------------------------------------------------------------------------------------------------------------------------------------------------------------------------------------------------------------------------------------------------------------------------------------------------------------|------------------------------------------------------------------------------------------------------------------------------------------------------------------------------------------------------------------------------------------------------------------------------------------------------------------------------------------------------------------------------------------------------------------------------------------------------------------------------------------------------------------------------------------------------------------------------------------------------------------------------------------------------------------------------------------------------------------------------------------------------------------------------------------------------------------------------------------------------------------------------------------------------------------------------------------------------------------------------------------------------------------------------------------------------------------------------------------|--------------------------------------------------------------------------------------------------------------------------------------------------------------------------------------------------------------------------------------------------------------------------------------------------------------------------------------------------------------------------------------------------------------------------------------------------------------------------------------------------------------------------------------------------------------------------------------------------------------------------------------------------------------------------------------------------------------------------------------------------------------------------------------------------------------------------------------------------------------------------------------------------------------------------------------------------------------------------------------------------------------------------------------------------------------------------------------------------------------------------------------------------------------------------------------------------------------------------------------------------------------------------------------------------|

|  |  |  |                                                                                                                                                                                                                                                                                                                                                                                                                                                                                                                                                                                                                                                                                                                                                                                                                                                                                                           |                                                                                                                                                                                                                                                                                                                                                                                                                                                                                                                                                                                                                                                                                                                                                                                                                                                                                                                                                                                                                                                                                                                                       |                                                                                                                                                                                                                                                                                                                                                                                                                                                                                                                                                                                                                                                                                                                                       |
|--|--|--|-----------------------------------------------------------------------------------------------------------------------------------------------------------------------------------------------------------------------------------------------------------------------------------------------------------------------------------------------------------------------------------------------------------------------------------------------------------------------------------------------------------------------------------------------------------------------------------------------------------------------------------------------------------------------------------------------------------------------------------------------------------------------------------------------------------------------------------------------------------------------------------------------------------|---------------------------------------------------------------------------------------------------------------------------------------------------------------------------------------------------------------------------------------------------------------------------------------------------------------------------------------------------------------------------------------------------------------------------------------------------------------------------------------------------------------------------------------------------------------------------------------------------------------------------------------------------------------------------------------------------------------------------------------------------------------------------------------------------------------------------------------------------------------------------------------------------------------------------------------------------------------------------------------------------------------------------------------------------------------------------------------------------------------------------------------|---------------------------------------------------------------------------------------------------------------------------------------------------------------------------------------------------------------------------------------------------------------------------------------------------------------------------------------------------------------------------------------------------------------------------------------------------------------------------------------------------------------------------------------------------------------------------------------------------------------------------------------------------------------------------------------------------------------------------------------|
|  |  |  | <p>Nicotine has been identified as an optic nerve toxin.</p> <p>Glare and sensitivity Sunglasses or tinted lenses help with glare and contrast.</p> <p>Yellow, amber and brown tints are best for blocking out glare from florescent lights.</p> <p>Brown tints are best for bright sunshine.</p> <p>Yellow/amber tints are best for overcast days or night time.</p> <p>General lifestyle</p> <p>Flying – no problems for people with glaucoma.</p> <p>Wearing contact lenses – does not affect intraocular pressure.</p> <p>Playing musical instruments – playing a wind instrument for a prolonged period may increase intraocular pressure.</p> <p>Wearing tight neck ties, collars or holding breath causes slight increase in intraocular pressure.</p> <p>Blood pressure (BP) – Maintain good BP control (low BP affects blood flow to optic nerve &amp; high BP damages small blood vessels).</p> | <p>head significantly lower than the body may increase IOP.</p> <p>Using pillows to keep your head slightly elevated can be helpful.<sup>5</sup></p> <p>Smoking &amp; Alcohol</p> <p>Smoking damages blood vessels and reduces oxygen supply to the optic nerve. Heavy alcohol use can affect overall eye health; moderate consumption is less clearly linked.<sup>6</sup></p> <p>Stress Management</p> <p>Chronic stress can affect blood pressure and circulation, potentially impacting eye health. Relaxation techniques like meditation or deep breathing may help.<sup>7</sup></p> <p>Screen &amp; Eye Strain</p> <p>Frequent breaks from screens prevent eye strain, though they don't directly lower IOP; they contribute to overall comfort and well-being.</p> <p>Lifestyle changes alone cannot cure glaucoma, but they can complement medical treatment and slow progression.</p> <p>Always discuss any new activity or diet change with your eye doctor to ensure it's safe for your specific condition.</p> <p>If you want, I can give you a daily routine guide for glaucoma-friendly living. Would you like that?</p> | <p>pressure spikes.</p> <p><b>**Smoking**</b></p> <p>Smoking restricts blood flow and increases oxidative stress, which may compromise the blood supply to the optic nerve. Quitting is strongly advised for preserving vision.</p> <p><b>**Sleep Position**</b></p> <p>IOP increases when you lie down. Sleeping with your head slightly elevated (using a wedge pillow) may help reduce nighttime pressure compared to lying completely flat.</p> <p><b>**Other Factors**</b></p> <p>Playing high-resistance wind instruments (like the trumpet) or wearing tight neckties can raise intracranial and intraocular pressure. Managing stress is also beneficial, as high stress levels can trigger acute angle-closure glaucoma.</p> |
|--|--|--|-----------------------------------------------------------------------------------------------------------------------------------------------------------------------------------------------------------------------------------------------------------------------------------------------------------------------------------------------------------------------------------------------------------------------------------------------------------------------------------------------------------------------------------------------------------------------------------------------------------------------------------------------------------------------------------------------------------------------------------------------------------------------------------------------------------------------------------------------------------------------------------------------------------|---------------------------------------------------------------------------------------------------------------------------------------------------------------------------------------------------------------------------------------------------------------------------------------------------------------------------------------------------------------------------------------------------------------------------------------------------------------------------------------------------------------------------------------------------------------------------------------------------------------------------------------------------------------------------------------------------------------------------------------------------------------------------------------------------------------------------------------------------------------------------------------------------------------------------------------------------------------------------------------------------------------------------------------------------------------------------------------------------------------------------------------|---------------------------------------------------------------------------------------------------------------------------------------------------------------------------------------------------------------------------------------------------------------------------------------------------------------------------------------------------------------------------------------------------------------------------------------------------------------------------------------------------------------------------------------------------------------------------------------------------------------------------------------------------------------------------------------------------------------------------------------|

|                                                                                          |                                             |                                                                                |                                                                                                                                                                                                                                                                                                                                                                                                                                                                                                                                                                                                                                                                                                                                                                                                                                                                                                                                                                                                                          |                                                                                                                                                                                                                                                                                                                                                                                                                                                                                                                                                                                                                                                                                                                                                                                                                                                                                                                                                                                                                                                                                     |                                                                                                                                                                                                                                                                                                                                                                                                                                                                                                                                                                                                                                                                                                                                                                                                                                                                                                                                                                                                                                                                                                                                                    |
|------------------------------------------------------------------------------------------|---------------------------------------------|--------------------------------------------------------------------------------|--------------------------------------------------------------------------------------------------------------------------------------------------------------------------------------------------------------------------------------------------------------------------------------------------------------------------------------------------------------------------------------------------------------------------------------------------------------------------------------------------------------------------------------------------------------------------------------------------------------------------------------------------------------------------------------------------------------------------------------------------------------------------------------------------------------------------------------------------------------------------------------------------------------------------------------------------------------------------------------------------------------------------|-------------------------------------------------------------------------------------------------------------------------------------------------------------------------------------------------------------------------------------------------------------------------------------------------------------------------------------------------------------------------------------------------------------------------------------------------------------------------------------------------------------------------------------------------------------------------------------------------------------------------------------------------------------------------------------------------------------------------------------------------------------------------------------------------------------------------------------------------------------------------------------------------------------------------------------------------------------------------------------------------------------------------------------------------------------------------------------|----------------------------------------------------------------------------------------------------------------------------------------------------------------------------------------------------------------------------------------------------------------------------------------------------------------------------------------------------------------------------------------------------------------------------------------------------------------------------------------------------------------------------------------------------------------------------------------------------------------------------------------------------------------------------------------------------------------------------------------------------------------------------------------------------------------------------------------------------------------------------------------------------------------------------------------------------------------------------------------------------------------------------------------------------------------------------------------------------------------------------------------------------|
| <p>What is the treatment for primary open angle glaucoma?<br/>- SLT laser treatment.</p> | <p>What is SLT laser? How does it work?</p> | <p>What is SLT laser? How does it work? (limit your response to 167 words)</p> | <p>Selective Laser Trabeculoplasty (SLT) is a safe, quick, simple and non-invasive treatment option used to treat glaucoma. It works by reducing the pressure inside the eye. The eye pressure is known as intraocular pressure (IOP). The procedure does not require admission to hospital and is carried out in the outpatients department.</p> <p>There are different ways in which laser treatment can be used to treat patients with glaucoma. SLT uses an advanced laser to target specific cells in the trabecular meshwork (natural drainage channel) of the eye. Short pulses of low energy light are used to target only those cells that contain melanin, a natural pigment. In response, the cells activity is increased in order to improve the drainage of the fluid in the eye. This in turn lowers the intra-ocular pressure. Some patients can have an early response to the SLT but in most cases it can take up to six weeks for the effects of the laser to be apparent and for your IOP to drop</p> | <p>Selective Laser Trabeculoplasty (SLT) is a laser treatment for open-angle glaucoma designed to lower intraocular pressure (IOP). It targets the trabecular meshwork—the eye’s drainage tissue—using short pulses of low-energy laser light.</p> <p>The “selective” aspect means the laser affects only pigmented cells in the drainage area while leaving surrounding tissue intact. This minimizes heat damage compared to older laser methods. How it works:</p> <ol style="list-style-type: none"> <li>1. The laser stimulates a biological response in the trabecular meshwork cells.</li> <li>2. The eye’s natural immune and repair mechanisms are activated.</li> <li>3. Over weeks, drainage efficiency improves, allowing aqueous humor (eye fluid) to flow out more easily.</li> <li>4. This reduces IOP, which helps protect the optic nerve.</li> </ol> <p>The procedure is quick, usually painless, and performed in an ophthalmologist’s office. SLT can be repeated if necessary, though effectiveness may diminish with each treatment. It’s often used as a</p> | <p>Selective Laser Trabeculoplasty (SLT) is a non-invasive laser treatment designed to lower intraocular pressure in patients with open-angle glaucoma. It is often used when eye drops are ineffective or difficult to administer.</p> <p>SLT works by targeting the trabecular meshwork, the drainage system located at the angle where the iris meets the cornea. Unlike older laser techniques that rely on heat to burn tissue, SLT uses short, low-energy bursts of light to target only specific pigmented cells. This “selective” approach leaves the surrounding non-pigmented tissue and the structural integrity of the drainage angle undamaged.</p> <p>The laser energy triggers a biological healing response within the eye. This stimulates the body to release chemical messengers and recruit cells to clear debris from the meshwork. This “cleaning” process improves the outflow of aqueous humor (fluid) from the eye. By reducing resistance to drainage, intraocular pressure is lowered, thereby protecting the optic nerve from further damage. Because SLT causes no scarring, the procedure can often be repeated.</p> |
|------------------------------------------------------------------------------------------|---------------------------------------------|--------------------------------------------------------------------------------|--------------------------------------------------------------------------------------------------------------------------------------------------------------------------------------------------------------------------------------------------------------------------------------------------------------------------------------------------------------------------------------------------------------------------------------------------------------------------------------------------------------------------------------------------------------------------------------------------------------------------------------------------------------------------------------------------------------------------------------------------------------------------------------------------------------------------------------------------------------------------------------------------------------------------------------------------------------------------------------------------------------------------|-------------------------------------------------------------------------------------------------------------------------------------------------------------------------------------------------------------------------------------------------------------------------------------------------------------------------------------------------------------------------------------------------------------------------------------------------------------------------------------------------------------------------------------------------------------------------------------------------------------------------------------------------------------------------------------------------------------------------------------------------------------------------------------------------------------------------------------------------------------------------------------------------------------------------------------------------------------------------------------------------------------------------------------------------------------------------------------|----------------------------------------------------------------------------------------------------------------------------------------------------------------------------------------------------------------------------------------------------------------------------------------------------------------------------------------------------------------------------------------------------------------------------------------------------------------------------------------------------------------------------------------------------------------------------------------------------------------------------------------------------------------------------------------------------------------------------------------------------------------------------------------------------------------------------------------------------------------------------------------------------------------------------------------------------------------------------------------------------------------------------------------------------------------------------------------------------------------------------------------------------|

|  |  |  |  |                                                                                                                                                                 |  |
|--|--|--|--|-----------------------------------------------------------------------------------------------------------------------------------------------------------------|--|
|  |  |  |  | <p>first-line therapy or alongside medications to control glaucoma progression.</p> <p>Do you want me to explain SLT's success rates and side effects next?</p> |  |
|--|--|--|--|-----------------------------------------------------------------------------------------------------------------------------------------------------------------|--|

|                                                                          |                                                                                                                                                                                                                        |                                                                                                                                                                                                                                                           |                                                                                                                                                                                                                                                                                                                                                                                                                                                                                                                                                                                                                                                                                                                                                                                                                                                                                                                                                                                                                                                                                                                                                           |                                                                                                                                                                                                                                                                                                                                                                                                                                                                                                                                                                                                                                                                                                                                                                                                                                                                                                                                                                                                                                                                                                                                                                                                         |                                                                                                                                                                                                                                                                                                                                                                                                                                                                                                                                                                                                                                                                                                                                                                                                                                                                                                                                                                                                                                                                                                                                                                                                                                       |
|--------------------------------------------------------------------------|------------------------------------------------------------------------------------------------------------------------------------------------------------------------------------------------------------------------|-----------------------------------------------------------------------------------------------------------------------------------------------------------------------------------------------------------------------------------------------------------|-----------------------------------------------------------------------------------------------------------------------------------------------------------------------------------------------------------------------------------------------------------------------------------------------------------------------------------------------------------------------------------------------------------------------------------------------------------------------------------------------------------------------------------------------------------------------------------------------------------------------------------------------------------------------------------------------------------------------------------------------------------------------------------------------------------------------------------------------------------------------------------------------------------------------------------------------------------------------------------------------------------------------------------------------------------------------------------------------------------------------------------------------------------|---------------------------------------------------------------------------------------------------------------------------------------------------------------------------------------------------------------------------------------------------------------------------------------------------------------------------------------------------------------------------------------------------------------------------------------------------------------------------------------------------------------------------------------------------------------------------------------------------------------------------------------------------------------------------------------------------------------------------------------------------------------------------------------------------------------------------------------------------------------------------------------------------------------------------------------------------------------------------------------------------------------------------------------------------------------------------------------------------------------------------------------------------------------------------------------------------------|---------------------------------------------------------------------------------------------------------------------------------------------------------------------------------------------------------------------------------------------------------------------------------------------------------------------------------------------------------------------------------------------------------------------------------------------------------------------------------------------------------------------------------------------------------------------------------------------------------------------------------------------------------------------------------------------------------------------------------------------------------------------------------------------------------------------------------------------------------------------------------------------------------------------------------------------------------------------------------------------------------------------------------------------------------------------------------------------------------------------------------------------------------------------------------------------------------------------------------------|
| <p>What is the treatment for primary open angle glaucoma? – surgery.</p> | <p>What is a trabeculectomy ? How is a trabeculectomy operation performed? How successful is trabeculectomy surgery at lowering intra-ocular pressure? Are there any risks associated with trabeculectomy surgery?</p> | <p>What is a trabeculectomy ? How is a trabeculectomy operation performed? How successful is trabeculectomy surgery at lowering intra-ocular pressure? Are there any risks associated with trabeculectomy surgery? (limit your response to 630 words)</p> | <p>A trabeculectomy is an operation to create an alternative drainage channel, to help aqueous fluid (natural fluid of the eye) drain from your eye. This operation creates a bypass for the blocked natural drain (trabecular meshwork) of your eye. Your eye pressure is reduced because fluid can now drain more easily through the newly created drainage channel.</p> <p>During this operation a tiny opening is made to form a new drainage channel in the white of your eye (sclera), underneath the top eyelid. This allows the aqueous fluid to drain through the opening into a reservoir called a bleb and then to be absorbed by the body. Trabeculectomy surgery can be carried out under either a local anaesthetic or a general anaesthetic. These choices will be discussed with you prior to your operation date.</p> <p>Audits and studies show that the success of trabeculectomy surgery is dependent upon many things. Factors that can reduce the success of trabeculectomy surgery are:</p> <ul style="list-style-type: none"> <li>• Young age</li> <li>• Ethnic group</li> <li>• Uveitis (inflammation within the eye)</li> </ul> | <p><b>A trabeculectomy</b> is a surgical procedure used to treat glaucoma by creating a new drainage pathway for aqueous humor (the clear fluid inside the eye) to escape, thereby lowering <b>intraocular pressure (IOP)</b> and helping protect the optic nerve from damage. It's usually performed when medications and/or laser treatments (like SLT) are insufficient to control IOP. --- ##</p> <p><b>How a Trabeculectomy Is Performed</b></p> <ol style="list-style-type: none"> <li>1. <b>Preparation</b> – The eye is numbed with local anesthesia (sometimes with sedation).</li> <li>2. <b>Creating a flap</b> – The surgeon makes a small incision in the sclera (the white of the eye) under the upper eyelid.</li> <li>3. <b>Drainage pathway</b> – A partial-thickness scleral flap is created, and a small opening is made into the eye's anterior chamber.</li> <li>4. <b>Filtration bleb</b> – Fluid drains out under the scleral flap and collects beneath the conjunctiva (the thin membrane covering the sclera), creating a small blister-like "bleb."</li> <li>5. <b>Closure</b> – The flap is sutured to control drainage and prevent excessive fluid loss, and the</li> </ol> | <p><b>**What is a Trabeculectomy?*</b><br/> A trabeculectomy is a surgical procedure used to treat glaucoma, specifically when medications and laser treatments (like SLT) have failed to lower intraocular pressure (IOP) sufficiently. Often considered the "gold standard" of glaucoma surgery, its primary goal is to create a new drainage pathway for aqueous humor (eye fluid) to bypass the eye's blocked natural drainage system (the trabecular meshwork). By reducing IOP, the surgery helps prevent further damage to the optic nerve and halts vision loss.</p> <p><b>**How is the Operation Performed?*</b><br/> The procedure is performed in an operating room, typically under local anesthesia with intravenous sedation. The steps generally include:</p> <ol style="list-style-type: none"> <li>1. <b>**Preparation:*</b><br/> The surgeon creates a flap in the conjunctiva (the transparent membrane covering the eye) and the sclera (the white part of the eye) to access the deeper tissues.</li> <li>2. <b>**Creating the Pathway:*</b><br/> Underneath the scleral flap, a small piece of the blocked trabecular meshwork is removed to create an opening into the anterior chamber of the eye.</li> </ol> |
|--------------------------------------------------------------------------|------------------------------------------------------------------------------------------------------------------------------------------------------------------------------------------------------------------------|-----------------------------------------------------------------------------------------------------------------------------------------------------------------------------------------------------------------------------------------------------------|-----------------------------------------------------------------------------------------------------------------------------------------------------------------------------------------------------------------------------------------------------------------------------------------------------------------------------------------------------------------------------------------------------------------------------------------------------------------------------------------------------------------------------------------------------------------------------------------------------------------------------------------------------------------------------------------------------------------------------------------------------------------------------------------------------------------------------------------------------------------------------------------------------------------------------------------------------------------------------------------------------------------------------------------------------------------------------------------------------------------------------------------------------------|---------------------------------------------------------------------------------------------------------------------------------------------------------------------------------------------------------------------------------------------------------------------------------------------------------------------------------------------------------------------------------------------------------------------------------------------------------------------------------------------------------------------------------------------------------------------------------------------------------------------------------------------------------------------------------------------------------------------------------------------------------------------------------------------------------------------------------------------------------------------------------------------------------------------------------------------------------------------------------------------------------------------------------------------------------------------------------------------------------------------------------------------------------------------------------------------------------|---------------------------------------------------------------------------------------------------------------------------------------------------------------------------------------------------------------------------------------------------------------------------------------------------------------------------------------------------------------------------------------------------------------------------------------------------------------------------------------------------------------------------------------------------------------------------------------------------------------------------------------------------------------------------------------------------------------------------------------------------------------------------------------------------------------------------------------------------------------------------------------------------------------------------------------------------------------------------------------------------------------------------------------------------------------------------------------------------------------------------------------------------------------------------------------------------------------------------------------|

|  |  |  |                                                                                                                                                                                                                                                                                                                                                                                                                                                                                                                                                                                                                                                                                                                                                                                                                                                                                                                                                                                                                                                                                                                                                           |                                                                                                                                                                                                                                                                                                                                                                                                                                                                                                                                                                                                                                                                                                                                                                                                                                                                                                                                                                                                                                                                                                                                                                              |                                                                                                                                                                                                                                                                                                                                                                                                                                                                                                                                                                                                                                                                                                                                                                                                                                                                                                                                                                                                                                                                                                                                                                                                                                                                                            |
|--|--|--|-----------------------------------------------------------------------------------------------------------------------------------------------------------------------------------------------------------------------------------------------------------------------------------------------------------------------------------------------------------------------------------------------------------------------------------------------------------------------------------------------------------------------------------------------------------------------------------------------------------------------------------------------------------------------------------------------------------------------------------------------------------------------------------------------------------------------------------------------------------------------------------------------------------------------------------------------------------------------------------------------------------------------------------------------------------------------------------------------------------------------------------------------------------|------------------------------------------------------------------------------------------------------------------------------------------------------------------------------------------------------------------------------------------------------------------------------------------------------------------------------------------------------------------------------------------------------------------------------------------------------------------------------------------------------------------------------------------------------------------------------------------------------------------------------------------------------------------------------------------------------------------------------------------------------------------------------------------------------------------------------------------------------------------------------------------------------------------------------------------------------------------------------------------------------------------------------------------------------------------------------------------------------------------------------------------------------------------------------|--------------------------------------------------------------------------------------------------------------------------------------------------------------------------------------------------------------------------------------------------------------------------------------------------------------------------------------------------------------------------------------------------------------------------------------------------------------------------------------------------------------------------------------------------------------------------------------------------------------------------------------------------------------------------------------------------------------------------------------------------------------------------------------------------------------------------------------------------------------------------------------------------------------------------------------------------------------------------------------------------------------------------------------------------------------------------------------------------------------------------------------------------------------------------------------------------------------------------------------------------------------------------------------------|
|  |  |  | <ul style="list-style-type: none"> <li>• Previous eye surgery</li> <li>• Previous severe eye injury</li> <li>• Neovascular glaucoma (where abnormal blood vessels grow on the iris)</li> <li>• Natural healing process causing scarring</li> <li>• Diabetes</li> <li>• Some eye drops, including multiple use of eye drops</li> </ul> <p>The measurement of surgical success will vary depending on the individual needs of the patient and on the parameters measured. If an eye pressure below 21mmHg at 2 years is taken as a success measure, research shows the national average is around 80% of patients achieving this.</p> <p>At the Manchester Royal Eye Hospital, we have repeatedly audited our results over the last 10 years and we consistently achieve success rates higher than this average. More specific details about success rates and your individual targets can be discussed with your ophthalmologist.</p> <p>As with any surgery, there is the potential for complications or problems to arise. Complications can occur during surgery, shortly after surgery or many months after surgery. Complications that can occur:</p> | <p>conjunctiva is closed to cover the site. 6.</p> <p><b>Post-op care –</b> Patients use antibiotic and anti-inflammatory eye drops for weeks or months to prevent infection and scarring, which could block fluid outflow. --- ##</p> <p><b>Success at Lowering IOP -</b> Trabeculectomy is considered <b>one of the most effective glaucoma surgeries</b> for reducing high IOP.</p> <ul style="list-style-type: none"> <li>- Many patients experience a 20–40% reduction in pressure, sometimes more, depending on their baseline readings.</li> <li>- Long-term success rates vary: about <b>70–90% at 1 year</b>, and <b>50–60% at 5 years</b>, often declining over time due to scarring of the drainage site. -</li> <li>- Some patients can reduce or stop glaucoma medications after surgery, though others may still need drops to maintain target pressures. --- ##</li> </ul> <p><b>Risks and Possible Complications</b></p> <p>Like any surgery, trabeculectomy carries risks. Some occur shortly after surgery, while others can develop months or years later:<b>Early risks: - Hypotony</b> – IOP too low, which can lead to blurred vision or choroidal</p> | <ol style="list-style-type: none"> <li>3. <b>**Iridectomy:**</b> A small hole is usually made in the iris (peripheral iridectomy) to prevent the iris from clogging the new opening.</li> <li>4. <b>**Closure:**</b> The scleral flap is sutured loosely. This acts as a valve, allowing fluid to trickle out of the eye in a controlled manner.</li> <li>5. <b>**Bleb Formation:**</b> The fluid flows out of the new opening and collects under the conjunctiva, creating a small, blister-like reservoir called a "bleb." This is usually located under the upper eyelid and is not visible to the naked eye. The fluid in the bleb is eventually reabsorbed by the body's blood vessels.</li> <li>6. <b>**Anti-Scarring Agents:**</b> To prevent the body from healing the new opening shut (scarring), surgeons often apply antimetabolite medications, such as Mitomycin C (MMC) or 5-Fluorouracil (5-FU), to the surgical site during the procedure.</li> </ol> <p><b>**Success Rates**</b></p> <p>Trabeculectomy is highly successful at lowering IOP. Statistics indicate that approximately 70% to 90% of surgeries are successful within the first year. Long-term success (over 5 years) generally ranges between 60% and 80%. Success is categorized as either "complete"</p> |
|--|--|--|-----------------------------------------------------------------------------------------------------------------------------------------------------------------------------------------------------------------------------------------------------------------------------------------------------------------------------------------------------------------------------------------------------------------------------------------------------------------------------------------------------------------------------------------------------------------------------------------------------------------------------------------------------------------------------------------------------------------------------------------------------------------------------------------------------------------------------------------------------------------------------------------------------------------------------------------------------------------------------------------------------------------------------------------------------------------------------------------------------------------------------------------------------------|------------------------------------------------------------------------------------------------------------------------------------------------------------------------------------------------------------------------------------------------------------------------------------------------------------------------------------------------------------------------------------------------------------------------------------------------------------------------------------------------------------------------------------------------------------------------------------------------------------------------------------------------------------------------------------------------------------------------------------------------------------------------------------------------------------------------------------------------------------------------------------------------------------------------------------------------------------------------------------------------------------------------------------------------------------------------------------------------------------------------------------------------------------------------------|--------------------------------------------------------------------------------------------------------------------------------------------------------------------------------------------------------------------------------------------------------------------------------------------------------------------------------------------------------------------------------------------------------------------------------------------------------------------------------------------------------------------------------------------------------------------------------------------------------------------------------------------------------------------------------------------------------------------------------------------------------------------------------------------------------------------------------------------------------------------------------------------------------------------------------------------------------------------------------------------------------------------------------------------------------------------------------------------------------------------------------------------------------------------------------------------------------------------------------------------------------------------------------------------|

|  |  |  |                                                                                                                                                                                                                                                                                                                                                                                                                                                                                                                                                                                                                                                                                                                                                                                                                                                                                                                                                                                                                                                                                                                                                                                                                                                                 |                                                                                                                                                                                                                                                                                                                                                                                                                                                                                                                                                                                                                                                                                                                                                                                                                                                                                                                                                                                                                                                                                                                                                                                                                                                              |                                                                                                                                                                                                                                                                                                                                                                                                                                                                                                                                                                                                                                                                                                                                                                                                                                                                                                                                                                                                                                                                                                                                                                                                                                                                           |
|--|--|--|-----------------------------------------------------------------------------------------------------------------------------------------------------------------------------------------------------------------------------------------------------------------------------------------------------------------------------------------------------------------------------------------------------------------------------------------------------------------------------------------------------------------------------------------------------------------------------------------------------------------------------------------------------------------------------------------------------------------------------------------------------------------------------------------------------------------------------------------------------------------------------------------------------------------------------------------------------------------------------------------------------------------------------------------------------------------------------------------------------------------------------------------------------------------------------------------------------------------------------------------------------------------|--------------------------------------------------------------------------------------------------------------------------------------------------------------------------------------------------------------------------------------------------------------------------------------------------------------------------------------------------------------------------------------------------------------------------------------------------------------------------------------------------------------------------------------------------------------------------------------------------------------------------------------------------------------------------------------------------------------------------------------------------------------------------------------------------------------------------------------------------------------------------------------------------------------------------------------------------------------------------------------------------------------------------------------------------------------------------------------------------------------------------------------------------------------------------------------------------------------------------------------------------------------|---------------------------------------------------------------------------------------------------------------------------------------------------------------------------------------------------------------------------------------------------------------------------------------------------------------------------------------------------------------------------------------------------------------------------------------------------------------------------------------------------------------------------------------------------------------------------------------------------------------------------------------------------------------------------------------------------------------------------------------------------------------------------------------------------------------------------------------------------------------------------------------------------------------------------------------------------------------------------------------------------------------------------------------------------------------------------------------------------------------------------------------------------------------------------------------------------------------------------------------------------------------------------|
|  |  |  | <ul style="list-style-type: none"> <li>• The most serious problem that can occur is bleeding inside the eye. This can lead to loss of vision and even blindness but occurs in less than 1 in 1000 patients.</li> <li>• An infection inside the eye can be very serious and also cause loss of vision or blindness. This also happens in less than 1 in 1000 patients.</li> <li>• After the operation the IOP may be too high or too low. This may require additional treatment in the outpatient clinic or sometimes further surgery is required.</li> <li>• Inflammation inside the eye can occur; this is treated with eye drops. Some patients are aware of the drainage bleb under their upper eyelid or that there is slight drooping of the eyelid, this usually settles down.</li> <li>• As your eye settles and heals you may need a change of glasses, to get your best vision. About 10% of patients notice that their vision is reduced by one line on the eye chart a year after the operation, as cataract formation may be increased by trabeculectomy surgery. The use of antimetabolites (anti-scarring drugs) The main reason for trabeculectomy failure is that the newly created drainage site can scar and heal up. The previous</li> </ul> | <p>detachment. -</p> <p><b>Leakage from bleb</b> – Fluid escaping at the surgery site can risk infection. -</p> <p><b>Bleeding inside the eye</b> – Rare but possible during or after surgery. -</p> <p><b>Infection</b> – Usually prevented with post-op antibiotic drops.<b>Late risks:</b></p> <ul style="list-style-type: none"> <li>- <b>Bleb failure</b> – Scarring can block the new drainage channel, causing IOP to rise again. -</li> <li>- <b>Endophthalmitis</b> – A serious, potentially sight-threatening infection entering through the bleb. -</li> <li>- <b>Cataract formation</b> – Increased risk compared to eyes that haven't had surgery. -</li> <li>- <b>Vision fluctuation</b> – Long-term changes in vision due to altered fluid dynamics. --- ##</li> </ul> <p><b>Patient Considerations</b> - Trabeculectomy is often reserved for cases where IOP is persistently high despite maximal medical therapy. - Success depends on surgical technique, post-operative care, and individual healing tendencies. - Lifelong follow-up is important, as complications can occur years after surgery. - Lifestyle adjustments—like avoiding activities that risk eye trauma—may help protect the bleb and maintain long-term function.</p> | <p>(target pressure achieved without eye drops) or "qualified" (target pressure achieved with the addition of eye drops). However, the effect can diminish over time if the body scars over the drainage site.</p> <p><b>**Risks and Complications**</b><br/>Because it is an invasive surgery, trabeculectomy carries more risks than laser treatments or minimally invasive glaucoma surgery (MIGS). These include:</p> <ul style="list-style-type: none"> <li>* <b>**Hypotony:**</b> The pressure becomes too low, potentially causing choroidal detachments or maculopathy (distortion of central vision).</li> <li>* <b>**Scarring (Failure):**</b> The body heals the surgical site too well, closing the new drain and causing pressure to rise again. This is the most common reason for failure.</li> <li>* <b>**Cataracts:**</b> The surgery frequently accelerates cataract formation.</li> <li>* <b>**Infection:**</b> Infection of the bleb (blebitis) or infection inside the eye (endophthalmitis) can occur months or even years later and is a vision-threatening emergency.</li> <li>* <b>**Bleb Leaks:**</b> The thin tissue of the bleb may tear or leak fluid.</li> <li>* <b>**Hyphema:**</b> Bleeding into the front chamber of the eye.</li> </ul> |
|--|--|--|-----------------------------------------------------------------------------------------------------------------------------------------------------------------------------------------------------------------------------------------------------------------------------------------------------------------------------------------------------------------------------------------------------------------------------------------------------------------------------------------------------------------------------------------------------------------------------------------------------------------------------------------------------------------------------------------------------------------------------------------------------------------------------------------------------------------------------------------------------------------------------------------------------------------------------------------------------------------------------------------------------------------------------------------------------------------------------------------------------------------------------------------------------------------------------------------------------------------------------------------------------------------|--------------------------------------------------------------------------------------------------------------------------------------------------------------------------------------------------------------------------------------------------------------------------------------------------------------------------------------------------------------------------------------------------------------------------------------------------------------------------------------------------------------------------------------------------------------------------------------------------------------------------------------------------------------------------------------------------------------------------------------------------------------------------------------------------------------------------------------------------------------------------------------------------------------------------------------------------------------------------------------------------------------------------------------------------------------------------------------------------------------------------------------------------------------------------------------------------------------------------------------------------------------|---------------------------------------------------------------------------------------------------------------------------------------------------------------------------------------------------------------------------------------------------------------------------------------------------------------------------------------------------------------------------------------------------------------------------------------------------------------------------------------------------------------------------------------------------------------------------------------------------------------------------------------------------------------------------------------------------------------------------------------------------------------------------------------------------------------------------------------------------------------------------------------------------------------------------------------------------------------------------------------------------------------------------------------------------------------------------------------------------------------------------------------------------------------------------------------------------------------------------------------------------------------------------|

|  |  |  |                                                                                                                                                                                                                                                                                                                                                                                                                                                                                                                                                                                                                               |                                                                                                                                                                                                                                                                                                                                                                                                                                                                                 |                                                                                                                          |
|--|--|--|-------------------------------------------------------------------------------------------------------------------------------------------------------------------------------------------------------------------------------------------------------------------------------------------------------------------------------------------------------------------------------------------------------------------------------------------------------------------------------------------------------------------------------------------------------------------------------------------------------------------------------|---------------------------------------------------------------------------------------------------------------------------------------------------------------------------------------------------------------------------------------------------------------------------------------------------------------------------------------------------------------------------------------------------------------------------------------------------------------------------------|--------------------------------------------------------------------------------------------------------------------------|
|  |  |  | <p>mentioned risk factors can influence this.</p> <p>Antimetabolites are drugs that prevent scar tissue from forming. If the doctor is concerned that excess scarring may occur, then the use of these medications can reduce this process and enhance the success rate of the operation.</p> <p>The most commonly used antimetabolites are 5 Fluorouracil (5FU) and Mitomycin C (MMC). These can be used at the time of surgery and 5FU can be used in the out-patients clinic and given by the doctor as an injection around the drainage bleb. Further information will be given to you if you require this treatment.</p> | <p>--- <b>Bottom Line:</b> Trabeculectomy is a proven, effective surgery for lowering IOP in moderate to severe glaucoma. While it offers a chance at long-term pressure control and reduced reliance on drops, it requires careful follow-up and carries risks that should be weighed against its benefits. --- If you'd like, I can create a <b>simple diagram showing how trabeculectomy drains eye fluid</b> so it's easier to visualize. Would you like me to do that?</p> | <p>Despite these risks, trabeculectomy remains a vital option for preserving vision in eyes with advancing glaucoma.</p> |
|--|--|--|-------------------------------------------------------------------------------------------------------------------------------------------------------------------------------------------------------------------------------------------------------------------------------------------------------------------------------------------------------------------------------------------------------------------------------------------------------------------------------------------------------------------------------------------------------------------------------------------------------------------------------|---------------------------------------------------------------------------------------------------------------------------------------------------------------------------------------------------------------------------------------------------------------------------------------------------------------------------------------------------------------------------------------------------------------------------------------------------------------------------------|--------------------------------------------------------------------------------------------------------------------------|

## Nystagmus

| <p><b>Royal College of Ophthalmologist (RCOphth) Leaflet:</b><br/> <a href="https://www.rcophth.ac.uk/wp-content/uploads/2024/06/Understanding-Nystagmus-2023.pdf">https://www.rcophth.ac.uk/wp-content/uploads/2024/06/Understanding-Nystagmus-2023.pdf</a></p> |                     |                                                       |                                                                                                                                                                                                                                                    |                                                                                                                                                                                                                           |                                                                                                                                                                                                                                               |
|------------------------------------------------------------------------------------------------------------------------------------------------------------------------------------------------------------------------------------------------------------------|---------------------|-------------------------------------------------------|----------------------------------------------------------------------------------------------------------------------------------------------------------------------------------------------------------------------------------------------------|---------------------------------------------------------------------------------------------------------------------------------------------------------------------------------------------------------------------------|-----------------------------------------------------------------------------------------------------------------------------------------------------------------------------------------------------------------------------------------------|
| <p><b>NHS leaflet:</b> <a href="https://mft.nhs.uk/app/uploads/sites/2/2020/10/REH-281-Nystagmus.pdf">https://mft.nhs.uk/app/uploads/sites/2/2020/10/REH-281-Nystagmus.pdf</a></p>                                                                               |                     |                                                       |                                                                                                                                                                                                                                                    |                                                                                                                                                                                                                           |                                                                                                                                                                                                                                               |
| RCOphth leaflet section heading                                                                                                                                                                                                                                  | NHS section heading | GenAI prompt                                          | NHS text                                                                                                                                                                                                                                           | GPT-5 output                                                                                                                                                                                                              | Gemini 3 output                                                                                                                                                                                                                               |
| What is nystagmus?                                                                                                                                                                                                                                               | What is nystagmus?  | What is nystagmus? (restrict your answer to 43 words) | <p>Nystagmus is an uncontrollable eye movement disorder of the eyes, either side to side, up and down, in circles, or a combination of these. It affects around 1 in 1000 people.</p> <p>Each person is different as is their nystagmus, their</p> | <p>Nystagmus is an involuntary, repetitive movement of the eyes, which can be horizontal, vertical, or rotary. It may result from neurological disorders, inner ear problems, or visual impairment, and often affects</p> | <p>Nystagmus is a vision condition characterized by repetitive, uncontrolled eye movements. These movements can occur from side to side, up and down, or in a circular pattern. Consequently, it may result in reduced vision, poor depth</p> |

|                        |                        |                                                            |                                                                                                                                                                                                                                                                                                                                                                                                                                                                                                                                                                                                                                                                                                                                                     |                                                                                                                                                                                                                                                                                                                                                                                                                                                                                                                                                                                                                                                                                                                                                           |                                                                                                                                                                                                                                                                                                                                                                                                                                                                                                                                                                                                                                                                                                                                                                                                |
|------------------------|------------------------|------------------------------------------------------------|-----------------------------------------------------------------------------------------------------------------------------------------------------------------------------------------------------------------------------------------------------------------------------------------------------------------------------------------------------------------------------------------------------------------------------------------------------------------------------------------------------------------------------------------------------------------------------------------------------------------------------------------------------------------------------------------------------------------------------------------------------|-----------------------------------------------------------------------------------------------------------------------------------------------------------------------------------------------------------------------------------------------------------------------------------------------------------------------------------------------------------------------------------------------------------------------------------------------------------------------------------------------------------------------------------------------------------------------------------------------------------------------------------------------------------------------------------------------------------------------------------------------------------|------------------------------------------------------------------------------------------------------------------------------------------------------------------------------------------------------------------------------------------------------------------------------------------------------------------------------------------------------------------------------------------------------------------------------------------------------------------------------------------------------------------------------------------------------------------------------------------------------------------------------------------------------------------------------------------------------------------------------------------------------------------------------------------------|
|                        |                        |                                                            | investigation, and treatment.                                                                                                                                                                                                                                                                                                                                                                                                                                                                                                                                                                                                                                                                                                                       | vision, balance, and depth perception.                                                                                                                                                                                                                                                                                                                                                                                                                                                                                                                                                                                                                                                                                                                    | perception, and balance issues.                                                                                                                                                                                                                                                                                                                                                                                                                                                                                                                                                                                                                                                                                                                                                                |
| What causes nystagmus? | What causes nystagmus? | What causes nystagmus? (restrict your answer to 103 words) | <p>For many people with nystagmus, there are no related health issues or other eye conditions, so their nystagmus is idiopathic (no known cause). Nystagmus can be caused by a problem with your eyes, or the pathway connecting your eyes to your brain. You can be born with nystagmus (congenital) or develop it later (acquired). Some more common causes of nystagmus are:</p> <ul style="list-style-type: none"> <li>• Congenital cataracts</li> <li>• Ocular albinism</li> <li>• Retinal dystrophies</li> <li>• Optic nerve conditions</li> <li>• Aniridia</li> </ul> <p>Some nystagmus can be inherited, meaning it is genetically passed on from a member of your family. However, in many cases, the causes of nystagmus are unknown.</p> | <p>Nystagmus can be caused by various factors, including congenital conditions, neurological disorders, and inner ear dysfunction. Common causes include multiple sclerosis, stroke, head trauma, or brain tumors affecting eye movement control. Inner ear problems, such as vestibular neuritis or Ménière's disease, disrupt balance and coordination, leading to eye oscillations. Certain medications, alcohol, or drug intoxication may also induce nystagmus. Congenital forms often result from developmental issues in the visual pathways. Other triggers include infections, migraines, and genetic disorders. The underlying mechanism involves disruption in the brain or inner ear systems that coordinate and stabilize eye movements.</p> | <p>Nystagmus stems from issues in the brain areas controlling eye movement. It is categorized as congenital or acquired. Congenital causes usually involve genetic inheritance or early developmental eye defects like cataracts, optic nerve hypoplasia, or albinism. Acquired nystagmus develops later, often resulting from neurological conditions such as multiple sclerosis, stroke, brain tumors, or head trauma. Inner ear disorders like Meniere's disease also trigger it by affecting balance. Furthermore, toxicity plays a significant role; excessive alcohol consumption, drug use, or side effects from specific medications (particularly anti-seizure drugs like phenytoin) can induce these involuntary eye movements. Vitamin deficiencies are also potential factors.</p> |

|                                                    |                                                 |                                                                                     |                                                                                                                                                                                                                                                                                                                                                                                                                                                                                                                                                                                                                                                                                                                                                                                                                                                                                                                                |                                                                                                                                                                                                                                                                                                                                                                                                                                                                                                                                                                                                                                                                                                                                                                                                                                                                                         |                                                                                                                                                                                                                                                                                                                                                                                                                                                                                                                                                                                                                                                                                                                                                                                                                                                                                                            |
|----------------------------------------------------|-------------------------------------------------|-------------------------------------------------------------------------------------|--------------------------------------------------------------------------------------------------------------------------------------------------------------------------------------------------------------------------------------------------------------------------------------------------------------------------------------------------------------------------------------------------------------------------------------------------------------------------------------------------------------------------------------------------------------------------------------------------------------------------------------------------------------------------------------------------------------------------------------------------------------------------------------------------------------------------------------------------------------------------------------------------------------------------------|-----------------------------------------------------------------------------------------------------------------------------------------------------------------------------------------------------------------------------------------------------------------------------------------------------------------------------------------------------------------------------------------------------------------------------------------------------------------------------------------------------------------------------------------------------------------------------------------------------------------------------------------------------------------------------------------------------------------------------------------------------------------------------------------------------------------------------------------------------------------------------------------|------------------------------------------------------------------------------------------------------------------------------------------------------------------------------------------------------------------------------------------------------------------------------------------------------------------------------------------------------------------------------------------------------------------------------------------------------------------------------------------------------------------------------------------------------------------------------------------------------------------------------------------------------------------------------------------------------------------------------------------------------------------------------------------------------------------------------------------------------------------------------------------------------------|
| <p>What are the effects of nystagmus on sight?</p> | <p>What do things look like with nystagmus?</p> | <p>What do things look like with nystagmus? (restrict your answer to 155 words)</p> | <p>If you are born with nystagmus your visual development may be delayed in early infancy. Most people with nystagmus will struggle to see well compared to others and often take a little bit longer to see things. This happens because the image coming into your eyes 'slips' on and off the retina (back of your eye) due to the constant movement, so it has less time to make an image clear. This can make it difficult to view fast moving objects which is something you will learn to be aware of. Some patients perceive things as shaking (oscillopsia) which is more common if your nystagmus is acquired. However, if your nystagmus is present from infancy this is rare. People with nystagmus can find bright lights uncomfortable (photophobia). Your diagnosis of nystagmus may be a surprise, but there are lots of resources and people to help you make some changes to make things easier for you.</p> | <p>For people with nystagmus, vision can appear unstable, shaky, or blurred because the eyes are constantly moving involuntarily. Instead of perceiving a still, steady scene, objects may seem to "wobble," "jump," or "drift," a phenomenon called oscillopsia in acquired cases. The severity varies—some experience mild movements they adapt to, while others find daily tasks like reading, driving, or recognizing faces challenging. Rapid eye motion can make fine visual detail harder to detect, reduce depth perception, and increase light sensitivity. In congenital nystagmus, the brain often adapts, so individuals may not perceive as much visual shaking, though clarity can still be impacted. Overall, the world may appear in constant motion, leading to visual fatigue, difficulty maintaining focus, and challenges with balance in certain environments.</p> | <p>The visual experience depends heavily on whether the nystagmus is congenital or acquired. For those with acquired nystagmus, the world often appears to shake, jump, or wiggle uncontrollably, a sensation known as oscillopsia. It is similar to watching a shaky handheld video, often causing vertigo and nausea.</p> <p>Conversely, individuals born with the condition usually do not see the world shaking because their brains adapt to the constant motion. Instead, their vision is primarily blurry. Objects appear out of focus, making it difficult to recognize faces or read fine print. Both groups typically struggle with depth perception and tracking fast-moving objects. To see things more clearly, many people adopt a "null point" head posture, tilting or turning their head to a specific angle where eye movement slows down, providing the most stable image possible.</p> |
|----------------------------------------------------|-------------------------------------------------|-------------------------------------------------------------------------------------|--------------------------------------------------------------------------------------------------------------------------------------------------------------------------------------------------------------------------------------------------------------------------------------------------------------------------------------------------------------------------------------------------------------------------------------------------------------------------------------------------------------------------------------------------------------------------------------------------------------------------------------------------------------------------------------------------------------------------------------------------------------------------------------------------------------------------------------------------------------------------------------------------------------------------------|-----------------------------------------------------------------------------------------------------------------------------------------------------------------------------------------------------------------------------------------------------------------------------------------------------------------------------------------------------------------------------------------------------------------------------------------------------------------------------------------------------------------------------------------------------------------------------------------------------------------------------------------------------------------------------------------------------------------------------------------------------------------------------------------------------------------------------------------------------------------------------------------|------------------------------------------------------------------------------------------------------------------------------------------------------------------------------------------------------------------------------------------------------------------------------------------------------------------------------------------------------------------------------------------------------------------------------------------------------------------------------------------------------------------------------------------------------------------------------------------------------------------------------------------------------------------------------------------------------------------------------------------------------------------------------------------------------------------------------------------------------------------------------------------------------------|

|                               |                                        |                                                                           |                                                                                                                                                                                                                                                                                                       |                                                                                                                                                                                                                                                                                                                  |                                                                                                                                                                                                                                                                                                                    |
|-------------------------------|----------------------------------------|---------------------------------------------------------------------------|-------------------------------------------------------------------------------------------------------------------------------------------------------------------------------------------------------------------------------------------------------------------------------------------------------|------------------------------------------------------------------------------------------------------------------------------------------------------------------------------------------------------------------------------------------------------------------------------------------------------------------|--------------------------------------------------------------------------------------------------------------------------------------------------------------------------------------------------------------------------------------------------------------------------------------------------------------------|
| How can nystagmus be managed? | What can be done to help my nystagmus? | What can be done to help my nystagmus? (restrict your answer to 46 words) | There is currently no cure for nystagmus. There are various therapies and treatments used to maximise the vision of patients with nystagmus. Treatments options are not the same for everybody with nystagmus. The options that are available for you will be discussed at your hospital appointment. | Management of nystagmus depends on its cause. Options include treating underlying conditions, using glasses or contact lenses, prism lenses, vision therapy, or surgery to reduce eye movement. Medications like gabapentin or memantine may help. Adjusting head position can also improve focus and stability. | Treatments include glasses or contacts to sharpen focus and prism lenses to reduce head tilting. Medications may dampen movements in acquired cases, while muscle surgery can improve head posture. Additionally, low vision aids, such as magnifiers and bright lighting, effectively support daily visual tasks. |
|-------------------------------|----------------------------------------|---------------------------------------------------------------------------|-------------------------------------------------------------------------------------------------------------------------------------------------------------------------------------------------------------------------------------------------------------------------------------------------------|------------------------------------------------------------------------------------------------------------------------------------------------------------------------------------------------------------------------------------------------------------------------------------------------------------------|--------------------------------------------------------------------------------------------------------------------------------------------------------------------------------------------------------------------------------------------------------------------------------------------------------------------|

## Posterior Vitreous Detachment

|                                                                                                                                                                                             |                            |                     |                 |                     |                        |
|---------------------------------------------------------------------------------------------------------------------------------------------------------------------------------------------|----------------------------|---------------------|-----------------|---------------------|------------------------|
| <b>Royal College of Ophthalmologist (RCOphth) Leaflet:</b>                                                                                                                                  |                            |                     |                 |                     |                        |
| <a href="https://www.rcophth.ac.uk/wp-content/uploads/2023/09/Understanding-Series-PVD-2023.pdf">https://www.rcophth.ac.uk/wp-content/uploads/2023/09/Understanding-Series-PVD-2023.pdf</a> |                            |                     |                 |                     |                        |
| <b>NHS leaflet:</b> <a href="https://mft.nhs.uk/app/uploads/sites/2/2018/05/REH-024-PVD-Amended.pdf">https://mft.nhs.uk/app/uploads/sites/2/2018/05/REH-024-PVD-Amended.pdf</a>             |                            |                     |                 |                     |                        |
| <b>RCOphth leaflet section heading</b>                                                                                                                                                      | <b>NHS section heading</b> | <b>GenAI prompt</b> | <b>NHS text</b> | <b>GPT-5 output</b> | <b>Gemini 3 output</b> |

|                                               |                    |                                                                                  |                                                                                                                                                                                                                                                                                                                                                                                                                                                                                                                                                                                                                                                                                                                                                                                                                                                                                                                                      |                                                                                                                                                                                                                                                                                                                                                                                                                                                                                                                                                                                                                                                                                                                                                                                                                                                                                                              |                                                                                                                                                                                                                                                                                                                                                                                                                                                                                                                                                                                                                                                                                                                                                                                                                                                                                                                                                                                            |
|-----------------------------------------------|--------------------|----------------------------------------------------------------------------------|--------------------------------------------------------------------------------------------------------------------------------------------------------------------------------------------------------------------------------------------------------------------------------------------------------------------------------------------------------------------------------------------------------------------------------------------------------------------------------------------------------------------------------------------------------------------------------------------------------------------------------------------------------------------------------------------------------------------------------------------------------------------------------------------------------------------------------------------------------------------------------------------------------------------------------------|--------------------------------------------------------------------------------------------------------------------------------------------------------------------------------------------------------------------------------------------------------------------------------------------------------------------------------------------------------------------------------------------------------------------------------------------------------------------------------------------------------------------------------------------------------------------------------------------------------------------------------------------------------------------------------------------------------------------------------------------------------------------------------------------------------------------------------------------------------------------------------------------------------------|--------------------------------------------------------------------------------------------------------------------------------------------------------------------------------------------------------------------------------------------------------------------------------------------------------------------------------------------------------------------------------------------------------------------------------------------------------------------------------------------------------------------------------------------------------------------------------------------------------------------------------------------------------------------------------------------------------------------------------------------------------------------------------------------------------------------------------------------------------------------------------------------------------------------------------------------------------------------------------------------|
| <p>What is posterior vitreous detachment?</p> | <p>What is it?</p> | <p>What is posterior vitreous detachment? (limit your response to 153 words)</p> | <p>The inside of your eyeball is coated with a thin layer of light sensitive tissue called "retina". The retina attaches to the inner wall of your eye like wallpaper. Light entering your eye stimulates the retina, which generates electrical signals that your brain can interpret as vision. Immediately in front of the retina, lives a ball of transparent gel called "vitreous". The back end of the gel (posterior vitreous) has attachments to multiple points on your retina. At birth, the vitreous is a firm structure, and keeps its shape no matter how much the eye or head are moved. As we grow older, the gel disintegrates into a liquid, a process called vitreous liquefaction. As the gel weakens, it naturally begins to peel forward, away from the retina. The end point of this process is a posterior vitreous detachment (PVD); the complete separation of the back end of the gel from the retina.</p> | <p>Posterior vitreous detachment (PVD) occurs when the gel-like vitreous body separates from the retina's inner surface, most commonly with aging. Symptoms often include sudden new floaters, flashes of light, or cobweb-like shadows. Most PVDs are benign and stable, but the separation can sometimes tug or tear the retina; this may lead to retinal detachment, a sight-threatening emergency. Risk factors include older age, myopia, eye surgery or trauma, and inflammation. Diagnosis is by dilated fundus examination—ultrasound (B-scan) is used if the view is obscured. Management is usually reassurance and observation if the retina is intact; urgent retinal evaluation and treatment (laser, cryotherapy, or surgery) are required if a retinal tear or detachment is found. Seek prompt ophthalmic care for sudden increases in floaters, flashes, or any curtain/loss of vision.</p> | <p>Posterior Vitreous Detachment (PVD) is a common condition where the vitreous gel filling the eye shrinks and separates from the retina. This occurs naturally with aging as the vitreous liquefies, causing it to peel away from the back of the eye. It is most frequent in adults over 50 and those with significant nearsightedness. Symptoms typically include the sudden onset of "floaters"—seeing drifting specks or cobwebs—and flashes of light (photopsia) in the peripheral vision. PVD itself is generally harmless and does not permanently damage vision. However, the separation process can occasionally pull hard enough to tear the retina. A retinal tear can lead to retinal detachment, a serious emergency threatening sight. Consequently, anyone experiencing sudden floaters or flashes must undergo a dilated eye exam to ensure the retina remains intact. Over time, the brain usually adapts to the presence of floaters, making them less noticeable.</p> |
|-----------------------------------------------|--------------------|----------------------------------------------------------------------------------|--------------------------------------------------------------------------------------------------------------------------------------------------------------------------------------------------------------------------------------------------------------------------------------------------------------------------------------------------------------------------------------------------------------------------------------------------------------------------------------------------------------------------------------------------------------------------------------------------------------------------------------------------------------------------------------------------------------------------------------------------------------------------------------------------------------------------------------------------------------------------------------------------------------------------------------|--------------------------------------------------------------------------------------------------------------------------------------------------------------------------------------------------------------------------------------------------------------------------------------------------------------------------------------------------------------------------------------------------------------------------------------------------------------------------------------------------------------------------------------------------------------------------------------------------------------------------------------------------------------------------------------------------------------------------------------------------------------------------------------------------------------------------------------------------------------------------------------------------------------|--------------------------------------------------------------------------------------------------------------------------------------------------------------------------------------------------------------------------------------------------------------------------------------------------------------------------------------------------------------------------------------------------------------------------------------------------------------------------------------------------------------------------------------------------------------------------------------------------------------------------------------------------------------------------------------------------------------------------------------------------------------------------------------------------------------------------------------------------------------------------------------------------------------------------------------------------------------------------------------------|

|                                      |                               |                                                                  |                                                                                                                                                                                                                                                                                                                                                                                                                                                                                                                                                                                                                                                                                                                                                                                                                                                                                                                                                                                                                                                                                             |                                                                                                                                                                                                                                                                                                                                                                                                                                                                                                                                                                                                                                                                                                                                                                                                                  |                                                                                                                                                                                                                                                                                                                                                                                                                                                                                                                                                                                                                                                                                                                                                                                                                                                                                                                                                                     |
|--------------------------------------|-------------------------------|------------------------------------------------------------------|---------------------------------------------------------------------------------------------------------------------------------------------------------------------------------------------------------------------------------------------------------------------------------------------------------------------------------------------------------------------------------------------------------------------------------------------------------------------------------------------------------------------------------------------------------------------------------------------------------------------------------------------------------------------------------------------------------------------------------------------------------------------------------------------------------------------------------------------------------------------------------------------------------------------------------------------------------------------------------------------------------------------------------------------------------------------------------------------|------------------------------------------------------------------------------------------------------------------------------------------------------------------------------------------------------------------------------------------------------------------------------------------------------------------------------------------------------------------------------------------------------------------------------------------------------------------------------------------------------------------------------------------------------------------------------------------------------------------------------------------------------------------------------------------------------------------------------------------------------------------------------------------------------------------|---------------------------------------------------------------------------------------------------------------------------------------------------------------------------------------------------------------------------------------------------------------------------------------------------------------------------------------------------------------------------------------------------------------------------------------------------------------------------------------------------------------------------------------------------------------------------------------------------------------------------------------------------------------------------------------------------------------------------------------------------------------------------------------------------------------------------------------------------------------------------------------------------------------------------------------------------------------------|
| <p>What are the symptoms of PVD?</p> | <p>How will it affect me?</p> | <p>How will it affect me? (limit your response to 161 words)</p> | <p>As the vitreous gel transforms into a liquid, the solid particles of gel begin to swim around in their liquid surroundings. These "floaters" cast dark, mobile shadows onto the retina (and hence your vision), and can take on many shapes: dots, blobs, strings, spider legs, meshwork etc. As the liquefied vitreous begins to peel off the retina (PVD), two symptoms can occur.</p> <ol style="list-style-type: none"> <li>1. You may develop a sudden new shower of floaters, due to the acute reconfiguration of the vitreous gel.</li> <li>2. As the vitreous peels away, traction is applied at the points of attachment between the retina and gel. This traction stimulates the retina, which you experience as split-seconds of pin-point flashing lights. Once the gel has completely peeled away from the retina, a process that may take days to months, the flashing lights will subside. The floaters, however, will persist long term. You may notice them more on certain days, particularly against uniform, light coloured backgrounds (walls, the sky).</li> </ol> | <p>Most people with posterior vitreous detachment (PVD) notice new floaters—small shapes or cobwebs—and flashes of light. These usually become less bothersome over weeks to months as the brain adapts and the floaters settle. PVD itself doesn't usually cause permanent vision loss, but it can occasionally tug the retina and cause a tear or retinal detachment, which may lead to sudden vision loss. If your retina is intact after examination, your eye doctor will usually recommend observation with follow-up checks. If a tear or detachment is found, treatments (laser, cryotherapy, or surgery) can often prevent further vision loss. Seek urgent care for sudden increases in floaters, persistent flashing, a curtain or shadow over part of your vision, or any sudden drop in vision.</p> | <p>Primarily, you will notice visual disturbances. The most common effect is seeing "floaters"—drifting grey specks, cobwebs, or squiggly lines—especially when looking at bright backgrounds like a white screen or blue sky. You may also see brief streaks of light (flashes) in your peripheral vision, particularly in the dark.</p> <p>While annoying, these symptoms usually do not cause pain or permanent vision loss. Most often, the floaters settle out of your direct line of sight over a few months, and your brain learns to ignore them. Eventually, they become much less noticeable.</p> <p>However, there is a critical risk: if the vitreous pulls too hard, it can tear the retina. You must remain alert. If you experience a sudden "shower" of new floaters, a dark shadow or "curtain" descending over your vision, or blurred sight, you must seek emergency eye care immediately, as this indicates a potential retinal detachment.</p> |
|--------------------------------------|-------------------------------|------------------------------------------------------------------|---------------------------------------------------------------------------------------------------------------------------------------------------------------------------------------------------------------------------------------------------------------------------------------------------------------------------------------------------------------------------------------------------------------------------------------------------------------------------------------------------------------------------------------------------------------------------------------------------------------------------------------------------------------------------------------------------------------------------------------------------------------------------------------------------------------------------------------------------------------------------------------------------------------------------------------------------------------------------------------------------------------------------------------------------------------------------------------------|------------------------------------------------------------------------------------------------------------------------------------------------------------------------------------------------------------------------------------------------------------------------------------------------------------------------------------------------------------------------------------------------------------------------------------------------------------------------------------------------------------------------------------------------------------------------------------------------------------------------------------------------------------------------------------------------------------------------------------------------------------------------------------------------------------------|---------------------------------------------------------------------------------------------------------------------------------------------------------------------------------------------------------------------------------------------------------------------------------------------------------------------------------------------------------------------------------------------------------------------------------------------------------------------------------------------------------------------------------------------------------------------------------------------------------------------------------------------------------------------------------------------------------------------------------------------------------------------------------------------------------------------------------------------------------------------------------------------------------------------------------------------------------------------|

|                                              |                               |                                                                  |                                                                                                                                                                                                                                                                                                                                                                                                                                                                                                                                                                                                                                                                                                                                                                                                                                         |                                                                                                                                                                                                                                                                                                                                                                                                                                                                                                                                                                                                                                                                                                                                                                                                                                  |                                                                                                                                                                                                                                                                                                                                                                                                                                                                                                                                                                                                                                                                                                                                                                                                                                                                                                                                                        |
|----------------------------------------------|-------------------------------|------------------------------------------------------------------|-----------------------------------------------------------------------------------------------------------------------------------------------------------------------------------------------------------------------------------------------------------------------------------------------------------------------------------------------------------------------------------------------------------------------------------------------------------------------------------------------------------------------------------------------------------------------------------------------------------------------------------------------------------------------------------------------------------------------------------------------------------------------------------------------------------------------------------------|----------------------------------------------------------------------------------------------------------------------------------------------------------------------------------------------------------------------------------------------------------------------------------------------------------------------------------------------------------------------------------------------------------------------------------------------------------------------------------------------------------------------------------------------------------------------------------------------------------------------------------------------------------------------------------------------------------------------------------------------------------------------------------------------------------------------------------|--------------------------------------------------------------------------------------------------------------------------------------------------------------------------------------------------------------------------------------------------------------------------------------------------------------------------------------------------------------------------------------------------------------------------------------------------------------------------------------------------------------------------------------------------------------------------------------------------------------------------------------------------------------------------------------------------------------------------------------------------------------------------------------------------------------------------------------------------------------------------------------------------------------------------------------------------------|
| <p>Is there any treatment for PVD?</p>       | <p>Can it be treated?</p>     | <p>Can it be treated? (limit your response to 41 words)</p>      | <p>While floaters are an inconvenience, they do not cause long term vision loss, and usually do not require treatment. The good news is that your brain adapts to ignore their presence, and they will become less noticeable over the coming months.</p>                                                                                                                                                                                                                                                                                                                                                                                                                                                                                                                                                                               | <p>Most PVDs require only observation and reassurance. Retinal tears/detachments are treated with laser, cryotherapy, or vitrectomy. Persistent disabling floaters can be managed with vitrectomy or YAG vitreolysis in select cases. Urgent retinal assessment is essential for new symptoms.</p>                                                                                                                                                                                                                                                                                                                                                                                                                                                                                                                               | <p>PVD itself typically requires no treatment; symptoms usually fade naturally. However, complications like retinal tears demand urgent laser repair. Rarely, if floaters severely impair vision, a vitrectomy surgery can be performed to remove them.</p>                                                                                                                                                                                                                                                                                                                                                                                                                                                                                                                                                                                                                                                                                            |
| <p>Are there any complications of a PVD?</p> | <p>Can anything go wrong?</p> | <p>Can anything go wrong? (limit your response to 158 words)</p> | <p>PVD is very common after the age of 50 and 2/3 of people will have developed it by age 70. Most people are just inconvenienced by the transient flashing lights and long-term floaters. However, in 10% of patients, the traction from the gel on the retina can lead to a retinal break/tear. In itself, this causes no other symptoms, but over the following few days, fluid from the vitreous seeps into the space between the retina and the eyeball through the tear. This causes peeling of the retina off the inside of the eyeball, a process known as "retinal detachment (RD)". The areas of detached retina lose vision. As most retinal tears don't occur in the centre, retinal detachments cause a curtain like loss of peripheral vision, that slowly extends towards the centre of vision over the coming days.</p> | <p>Yes—most PVDs are benign, but complications can occur. The main risks are retinal tears and retinal detachment (which can cause sudden, permanent vision loss if not treated). Other problems include vitreous hemorrhage (bleeding into the eye) causing sudden floaters or blurred vision, macular hole formation with central vision loss, and persistent, bothersome floaters. If treatment is needed, procedures (laser, cryotherapy, vitrectomy) carry their own risks—cataract progression, infection, bleeding, or raised intraocular pressure. Risk is higher with high myopia, eye trauma, inflammation, or recent eye surgery. Seek immediate ophthalmic care for sudden increased floaters, persistent flashes, a curtain/shadow over vision, or sudden vision loss. If the initial exam is normal, scheduled</p> | <p>Yes, significant complications can arise. The most dangerous risk is a retinal tear. As the vitreous separates, it may adhere tightly to the retina; if it pulls away too forcefully, it rips the retinal tissue. A tear allows fluid to seep underneath, leading to a retinal detachment—a medical emergency that can cause permanent blindness if not surgically repaired immediately.</p> <p>Additionally, the separation can tear retinal blood vessels, causing a vitreous hemorrhage (bleeding inside the eye) that obscures vision. Traction on the macula (the center of the retina) can also create a macular hole or cause scar tissue to form, known as an epiretinal membrane, which distorts central vision.</p> <p>You must monitor your symptoms closely. If you notice a sudden increase in floaters, a dark curtain over your vision, or significant blurring, seek emergency care instantly to prevent permanent vision loss.</p> |

|                                            |                              |                                                                |                                                                                                                                                                                                                                                                                                                                                                                                                        |                                                                                                                                                                                                                                                                                                                                                  |                                                                                                                                                                                                                                                                                                                                                                                                                                            |
|--------------------------------------------|------------------------------|----------------------------------------------------------------|------------------------------------------------------------------------------------------------------------------------------------------------------------------------------------------------------------------------------------------------------------------------------------------------------------------------------------------------------------------------------------------------------------------------|--------------------------------------------------------------------------------------------------------------------------------------------------------------------------------------------------------------------------------------------------------------------------------------------------------------------------------------------------|--------------------------------------------------------------------------------------------------------------------------------------------------------------------------------------------------------------------------------------------------------------------------------------------------------------------------------------------------------------------------------------------------------------------------------------------|
|                                            |                              |                                                                | Retinal tears can be treated with laser to minimise the risk of detachment. Retinal detachment must be treated surgically.                                                                                                                                                                                                                                                                                             | follow-up is important.                                                                                                                                                                                                                                                                                                                          |                                                                                                                                                                                                                                                                                                                                                                                                                                            |
| What medical investigations should I have? | When to seek further advice? | When to seek further advice? (limit your response to 69 words) | You should seek a repeat retinal examination if you develop any of the following:<br>1. A new shower of floaters, different to your current ones.<br>2. A new onset of ongoing flashing lights.<br>3. A curtain like loss of your peripheral vision. This is best tested by looking straight ahead, covering your other eye, and ensuring you can see 360 degrees peripherally as you continue to look straight ahead. | Seek urgent ophthalmic review if you develop a sudden increase in floaters, new flashes of light, a dark curtain or shadow over any part of your vision, sudden loss or distortion of vision, or bleeding or marked blurring. If your initial exam was normal, attend any scheduled follow-up and report any new or worsening symptoms promptly. | You must seek immediate medical attention if you experience a sudden increase or "shower" of new floaters, repeated flashes of light, or a dark shadow or curtain moving across your peripheral or central vision. These are signs of a retinal tear or detachment, which threatens your sight. Also, consult an eye doctor if you have sudden blurred vision or if existing floaters become significantly more bothersome or obstructive. |

## Retinal Detachment

|                                                                                                                                                                                                                   |                            |                     |                 |                     |                        |
|-------------------------------------------------------------------------------------------------------------------------------------------------------------------------------------------------------------------|----------------------------|---------------------|-----------------|---------------------|------------------------|
| <b>Royal College of Ophthalmologist (RCOphth) Leaflet:</b>                                                                                                                                                        |                            |                     |                 |                     |                        |
| <a href="https://www.rcophth.ac.uk/wp-content/uploads/2020/05/Understanding-Retinal-Detachment_2017_v4.pdf">https://www.rcophth.ac.uk/wp-content/uploads/2020/05/Understanding-Retinal-Detachment_2017_v4.pdf</a> |                            |                     |                 |                     |                        |
| <b>NHS leaflet:</b> <a href="https://mft.nhs.uk/app/uploads/sites/2/2018/05/REH-190-Retinal-Detachment.pdf">https://mft.nhs.uk/app/uploads/sites/2/2018/05/REH-190-Retinal-Detachment.pdf</a>                     |                            |                     |                 |                     |                        |
| <b>RCOphth leaflet section heading</b>                                                                                                                                                                            | <b>NHS section heading</b> | <b>GenAI prompt</b> | <b>NHS text</b> | <b>GPT-5 output</b> | <b>Gemini 3 output</b> |

|                                      |                                      |                                                                          |                                                                                                                                                                                                                                                                                                                                                                                                                                                                                                                                                                                                                                                                                                                                                                                                                                                             |                                                                                                                                                                                                                                                                                                                                                                                                                                                                                                                                                                                                                                                                                                                                                             |                                                                                                                                                                                                                                                                                                                                                                                                                                                                                                                                                                                                                                                                                                                                                                                                                                       |
|--------------------------------------|--------------------------------------|--------------------------------------------------------------------------|-------------------------------------------------------------------------------------------------------------------------------------------------------------------------------------------------------------------------------------------------------------------------------------------------------------------------------------------------------------------------------------------------------------------------------------------------------------------------------------------------------------------------------------------------------------------------------------------------------------------------------------------------------------------------------------------------------------------------------------------------------------------------------------------------------------------------------------------------------------|-------------------------------------------------------------------------------------------------------------------------------------------------------------------------------------------------------------------------------------------------------------------------------------------------------------------------------------------------------------------------------------------------------------------------------------------------------------------------------------------------------------------------------------------------------------------------------------------------------------------------------------------------------------------------------------------------------------------------------------------------------------|---------------------------------------------------------------------------------------------------------------------------------------------------------------------------------------------------------------------------------------------------------------------------------------------------------------------------------------------------------------------------------------------------------------------------------------------------------------------------------------------------------------------------------------------------------------------------------------------------------------------------------------------------------------------------------------------------------------------------------------------------------------------------------------------------------------------------------------|
| <p>What is a retinal detachment?</p> | <p>What is a retinal detachment?</p> | <p>What is a retinal detachment? (restrict your answer to 142 words)</p> | <p>A retinal detachment is a separation of the retina from its attachment to the wall of the eye. Most retinal detachments are a result of a retinal break, hole, or tear. These retinal breaks can occur when the vitreous gel pulls on the retina. Once the retina has torn, liquid from the vitreous gel can then pass through the tear and build up behind the retina. The build-up of fluid behind the retina separates (detaches) the retina from the back of the eye. The retinal detachment can progress and involve the entire retina. Another type of retinal detachment is called tractional detachment, which develops when scar tissue grows on the surface of the retina pulling the retinal layer off the back of the eye. Tractional detachment usually occurs in diabetic patients and does not require a hole in the retina to occur.</p> | <p>Retinal detachment is a serious eye condition where the retina — the light-sensitive tissue lining the back of the eye — pulls away from its normal position. This separation disrupts the retina's ability to process visual signals, leading to vision loss if not treated promptly. It can occur due to a tear or hole in the retina (often from aging changes), injury, or other eye diseases. Symptoms may include sudden flashes of light, a sudden increase in floaters, or a shadow or curtain across part of the visual field. Retinal detachment is a medical emergency; urgent evaluation and surgical treatment are usually required to preserve vision. Without timely intervention, permanent blindness in the affected eye can occur.</p> | <p>Retinal detachment is a critical eye condition occurring when the retina, the light-sensitive tissue at the back of the eye, pulls away from its underlying supportive tissue. This separation cuts the retina off from its supply of oxygen and nutrients.</p> <p>Commonly caused by a retinal tear allowing fluid to seep underneath, it functions like wallpaper peeling off a damp wall. Warning signs include the sudden appearance of floaters, flashes of light in one eye, or a dark shadow or "curtain" moving across your side or central vision.</p> <p>Retinal detachment is a medical emergency. Without prompt treatment, usually surgery, it can lead to permanent vision loss or total blindness in the affected eye. If you experience these symptoms, seek immediate ophthalmic care to preserve your sight.</p> |
|--------------------------------------|--------------------------------------|--------------------------------------------------------------------------|-------------------------------------------------------------------------------------------------------------------------------------------------------------------------------------------------------------------------------------------------------------------------------------------------------------------------------------------------------------------------------------------------------------------------------------------------------------------------------------------------------------------------------------------------------------------------------------------------------------------------------------------------------------------------------------------------------------------------------------------------------------------------------------------------------------------------------------------------------------|-------------------------------------------------------------------------------------------------------------------------------------------------------------------------------------------------------------------------------------------------------------------------------------------------------------------------------------------------------------------------------------------------------------------------------------------------------------------------------------------------------------------------------------------------------------------------------------------------------------------------------------------------------------------------------------------------------------------------------------------------------------|---------------------------------------------------------------------------------------------------------------------------------------------------------------------------------------------------------------------------------------------------------------------------------------------------------------------------------------------------------------------------------------------------------------------------------------------------------------------------------------------------------------------------------------------------------------------------------------------------------------------------------------------------------------------------------------------------------------------------------------------------------------------------------------------------------------------------------------|

|                                                       |                                              |                                                                                 |                                                                                                                                                                                                                                                                                                                                                                                                                                                           |                                                                                                                                                                                                                                                                                                                                                                                  |                                                                                                                                                                                                                                                                                                                                                                                                         |
|-------------------------------------------------------|----------------------------------------------|---------------------------------------------------------------------------------|-----------------------------------------------------------------------------------------------------------------------------------------------------------------------------------------------------------------------------------------------------------------------------------------------------------------------------------------------------------------------------------------------------------------------------------------------------------|----------------------------------------------------------------------------------------------------------------------------------------------------------------------------------------------------------------------------------------------------------------------------------------------------------------------------------------------------------------------------------|---------------------------------------------------------------------------------------------------------------------------------------------------------------------------------------------------------------------------------------------------------------------------------------------------------------------------------------------------------------------------------------------------------|
| <p>What are the symptoms of a retinal detachment?</p> | <p>What are retinal detachment symptoms?</p> | <p>What are retinal detachment symptoms? (restrict your answer to 53 words)</p> | <p>The most common symptoms are floaters (often described as black spots), flashing lights and a shadow or veil moving across your vision. These symptoms are never painful. Surgical treatment can often preserve or reduce the damage to your eyesight. Without treatment this condition usually becomes in-operable resulting in blindness of the affected eye.</p>                                                                                    | <p>Retinal detachment symptoms can include sudden flashes of light, a rapid increase in floaters (small specks or threads in vision), blurred vision, and a dark shadow or "curtain" across part of your visual field. Prompt medical attention is essential, as early treatment can help prevent permanent vision loss.</p>                                                     | <p>Symptoms often appear suddenly and include a sharp increase in floaters, flashes of light, and blurred vision. A hallmark sign is a dark shadow or "curtain" descending over your peripheral or central vision. The condition is typically painless. Immediate medical attention is crucial to prevent permanent vision loss.</p>                                                                    |
| <p>Who is at risk?</p>                                | <p>Who gets retinal detachment?</p>          | <p>Who gets retinal detachment? (restrict your answer to 66 words)</p>          | <p>Retinal detachment can occur at any age. Retinal detachments caused by tears in the retina affect approximately 1 in 10,000 people each year. The risk factors for developing retinal detachment are short sightedness (myopia), previous cataract surgery, eye injury, previous retinal detachment in your other eye, family history of retinal detachment or weak areas in your retina that have been noted by your ophthalmologist or optician.</p> | <p>Retinal detachment can affect anyone, but it's more common in people over 50, those with severe nearsightedness, a history of eye injury, previous eye surgery, or a family history of retinal detachment. It also occurs more often in people with certain eye diseases, such as lattice degeneration or diabetic retinopathy. Risk increases with aging and eye trauma.</p> | <p>Retinal detachment primarily affects individuals over age 50. You are at significantly higher risk if you have extreme nearsightedness, a family history of the condition, or previous eye surgeries like cataract removal. Other key risk factors include severe eye injuries, diabetic retinopathy, lattice degeneration, or having already experienced a retinal detachment in the other eye.</p> |

|                                                              |                               |                                                                  |                                                                                                                                                                                                                                                                                                                                                                                                                                      |                                                                                                                                                                                                                                                                                                                                                                                      |                                                                                                                                                                                                                                                                                                                                                                                             |
|--------------------------------------------------------------|-------------------------------|------------------------------------------------------------------|--------------------------------------------------------------------------------------------------------------------------------------------------------------------------------------------------------------------------------------------------------------------------------------------------------------------------------------------------------------------------------------------------------------------------------------|--------------------------------------------------------------------------------------------------------------------------------------------------------------------------------------------------------------------------------------------------------------------------------------------------------------------------------------------------------------------------------------|---------------------------------------------------------------------------------------------------------------------------------------------------------------------------------------------------------------------------------------------------------------------------------------------------------------------------------------------------------------------------------------------|
| <p>What treatment is available for a retinal detachment?</p> | <p>What is the treatment?</p> | <p>What is the treatment? (restrict your answer to 65 words)</p> | <p>Sometimes retinal tears or holes can be treated with laser therapy or cryotherapy (freezing) to prevent their progression to a retinal detachment. However, once the retina has detached, a more complex operation will be required to repair it and put the detached retina back in place. There are three types of eye surgery that are done for retinal detachment: vitrectomy, scleral buckling and pneumatic retinopexy.</p> | <p>Treatment for retinal detachment typically involves urgent surgery to reattach the retina, such as laser therapy, cryotherapy, pneumatic retinopexy, scleral buckle, or vitrectomy. The choice depends on the type and severity of detachment. Prompt intervention is crucial to preserve vision, as delayed treatment can lead to permanent vision loss in the affected eye.</p> | <p>Surgery is almost always required to repair a detached retina. Common procedures include pneumatic retinopexy (injecting a gas bubble), scleral buckling (placing a support band around the eye), and vitrectomy (removing the vitreous gel). For simple tears, doctors may use laser surgery or freezing (cryopexy). The specific method depends on the severity of the detachment.</p> |
|--------------------------------------------------------------|-------------------------------|------------------------------------------------------------------|--------------------------------------------------------------------------------------------------------------------------------------------------------------------------------------------------------------------------------------------------------------------------------------------------------------------------------------------------------------------------------------------------------------------------------------|--------------------------------------------------------------------------------------------------------------------------------------------------------------------------------------------------------------------------------------------------------------------------------------------------------------------------------------------------------------------------------------|---------------------------------------------------------------------------------------------------------------------------------------------------------------------------------------------------------------------------------------------------------------------------------------------------------------------------------------------------------------------------------------------|

|                                                                                 |                                                            |                                                                                                          |                                                                                                                                                                                                                                                                                                                                                                                                                                                                                                                                                                                                                                                                                                                                                                                                                                                                                                                                                                                                                                                                                                                                                 |                                                                                                                                                                                                                                                                                                                                                                                                                                                                                                                                                                                                                                                                                                                                                                                                                                                                                                                                                                                                                                                                                                                                                                                                                                           |                                                                                                                                                                                                                                                                                                                                                                                                                                                                                                                                                                                                                                                                                                                                                                                                                                                                                                                                                                                                                                                                                                                                                                                                                                                                                          |
|---------------------------------------------------------------------------------|------------------------------------------------------------|----------------------------------------------------------------------------------------------------------|-------------------------------------------------------------------------------------------------------------------------------------------------------------------------------------------------------------------------------------------------------------------------------------------------------------------------------------------------------------------------------------------------------------------------------------------------------------------------------------------------------------------------------------------------------------------------------------------------------------------------------------------------------------------------------------------------------------------------------------------------------------------------------------------------------------------------------------------------------------------------------------------------------------------------------------------------------------------------------------------------------------------------------------------------------------------------------------------------------------------------------------------------|-------------------------------------------------------------------------------------------------------------------------------------------------------------------------------------------------------------------------------------------------------------------------------------------------------------------------------------------------------------------------------------------------------------------------------------------------------------------------------------------------------------------------------------------------------------------------------------------------------------------------------------------------------------------------------------------------------------------------------------------------------------------------------------------------------------------------------------------------------------------------------------------------------------------------------------------------------------------------------------------------------------------------------------------------------------------------------------------------------------------------------------------------------------------------------------------------------------------------------------------|------------------------------------------------------------------------------------------------------------------------------------------------------------------------------------------------------------------------------------------------------------------------------------------------------------------------------------------------------------------------------------------------------------------------------------------------------------------------------------------------------------------------------------------------------------------------------------------------------------------------------------------------------------------------------------------------------------------------------------------------------------------------------------------------------------------------------------------------------------------------------------------------------------------------------------------------------------------------------------------------------------------------------------------------------------------------------------------------------------------------------------------------------------------------------------------------------------------------------------------------------------------------------------------|
| <p>Vitrectomy, scleral buckling, pneumatic retinopexy (gas bubble surgery).</p> | <p>Vitrectomy; Scleral buckling; Pneumatic retinopexy.</p> | <p>Explain vitrectomy, scleral buckling and pneumatic retinopexy (restrict your answer to 356 words)</p> | <p><b>Vitrectomy</b><br/>In some cases, in order to repair the retinal detachment, it is necessary to surgically remove the vitreous gel. This operation is called a Vitrectomy and is the most common way retinal surgery is performed. This procedure normally takes between one and two and a half hours. Tiny openings are made through the white scleral wall of the eye to allow placement of instruments into the eye. The vitreous gel of the eye is removed and replaced with either gas or oil to refill the eye and reposition the retina. Laser or cryotherapy (freezing) is used to treat the holes or tears that have caused the retinal detachment. If a gas bubble is used this will be absorbed and replaced by your eye's normal fluids over a few weeks. You must not fly whilst you have gas in your eye, as the reduced atmospheric pressure in the aircraft can cause the bubble to expand, leading to a dangerous rise in your eye pressure. If silicone oil is used this might need to be removed surgically some months later, as it does not get absorbed. A separate leaflet on the Vitrectomy procedure is also</p> | <p><b>Vitrectomy, scleral buckling, and pneumatic retinopexy</b> are surgical techniques used to repair retinal detachment, chosen based on detachment type, location, and severity.1. <b>Vitrectomy</b><br/>Vitrectomy is a procedure where the surgeon removes the vitreous gel — the clear substance filling the eye — to access the retina directly. The gel may be pulling on the retina or obstructing repair. After removal, the surgeon repairs the retinal tear using laser (photocoagulation) or freezing (cryotherapy) to seal the edges. The eye is then filled with a special gas bubble or silicone oil to hold the retina in place while it heals. The gas gradually absorbs over weeks, replaced by natural eye fluid. This method is often used for complex or extensive retinal detachments, especially with vitreous hemorrhage or scar tissue.2. <b>Scleral Buckling</b><br/>Scleral buckling involves placing a silicone band or sponge onto the outside of the eye (sclera). This buckle indents the eye wall inward, relieving traction on the retina and helping the detached area reattach. It also reduces fluid flow through the retinal tear. The buckle is usually permanent and not visible externally.</p> | <p><b>Retinal detachment surgeries</b> aim to reattach the retina and seal the tears that caused the separation. The three primary surgical methods differ in invasiveness and approach.</p> <p><b>**Pneumatic Retinopexy**</b><br/>This is the least invasive option, often performed in a doctor's office for uncomplicated detachments. The ophthalmologist injects a small gas bubble into the vitreous cavity. Because gas rises, you must maintain a specific head position for several days so the bubble floats against the detached area, pressing it back into place. Once reattached, the doctor uses a laser or freezing probe to seal the tear. The gas bubble is gradually reabsorbed by the body over time.</p> <p><b>**Scleral Buckling**</b><br/>This procedure involves placing a flexible silicone band or sponge around the outside of the eyeball (the sclera). The surgeon sews this band in place so it pushes the eye wall slightly inward. This indentation relieves the traction that the vitreous gel exerts on the retina and brings the eye wall closer to the detached retina, allowing it to settle back into position. The buckle is generally permanent but is not visible to others and usually causes no discomfort.</p> <p><b>**Vitrectomy**</b></p> |
|---------------------------------------------------------------------------------|------------------------------------------------------------|----------------------------------------------------------------------------------------------------------|-------------------------------------------------------------------------------------------------------------------------------------------------------------------------------------------------------------------------------------------------------------------------------------------------------------------------------------------------------------------------------------------------------------------------------------------------------------------------------------------------------------------------------------------------------------------------------------------------------------------------------------------------------------------------------------------------------------------------------------------------------------------------------------------------------------------------------------------------------------------------------------------------------------------------------------------------------------------------------------------------------------------------------------------------------------------------------------------------------------------------------------------------|-------------------------------------------------------------------------------------------------------------------------------------------------------------------------------------------------------------------------------------------------------------------------------------------------------------------------------------------------------------------------------------------------------------------------------------------------------------------------------------------------------------------------------------------------------------------------------------------------------------------------------------------------------------------------------------------------------------------------------------------------------------------------------------------------------------------------------------------------------------------------------------------------------------------------------------------------------------------------------------------------------------------------------------------------------------------------------------------------------------------------------------------------------------------------------------------------------------------------------------------|------------------------------------------------------------------------------------------------------------------------------------------------------------------------------------------------------------------------------------------------------------------------------------------------------------------------------------------------------------------------------------------------------------------------------------------------------------------------------------------------------------------------------------------------------------------------------------------------------------------------------------------------------------------------------------------------------------------------------------------------------------------------------------------------------------------------------------------------------------------------------------------------------------------------------------------------------------------------------------------------------------------------------------------------------------------------------------------------------------------------------------------------------------------------------------------------------------------------------------------------------------------------------------------|

|  |  |  |                                                                                                                                                                                                                                                                                                                                                                                                                                                                                                                                                                                                                                                                                                                                                                                                                                                                                                                                                                                         |                                                                                                                                                                                                                                                                                                                                                                                                                                                                                                                                                                                                                                                                                                                                                                                                                                                                                                                                                                                                                                                                                                                                                                                           |                                                                                                                                                                                                                                                                                                                                                                                                                                                                                                                                                                                                                                     |
|--|--|--|-----------------------------------------------------------------------------------------------------------------------------------------------------------------------------------------------------------------------------------------------------------------------------------------------------------------------------------------------------------------------------------------------------------------------------------------------------------------------------------------------------------------------------------------------------------------------------------------------------------------------------------------------------------------------------------------------------------------------------------------------------------------------------------------------------------------------------------------------------------------------------------------------------------------------------------------------------------------------------------------|-------------------------------------------------------------------------------------------------------------------------------------------------------------------------------------------------------------------------------------------------------------------------------------------------------------------------------------------------------------------------------------------------------------------------------------------------------------------------------------------------------------------------------------------------------------------------------------------------------------------------------------------------------------------------------------------------------------------------------------------------------------------------------------------------------------------------------------------------------------------------------------------------------------------------------------------------------------------------------------------------------------------------------------------------------------------------------------------------------------------------------------------------------------------------------------------|-------------------------------------------------------------------------------------------------------------------------------------------------------------------------------------------------------------------------------------------------------------------------------------------------------------------------------------------------------------------------------------------------------------------------------------------------------------------------------------------------------------------------------------------------------------------------------------------------------------------------------------|
|  |  |  | <p>available which contains further information in more detail.</p> <p><b>Scleral buckling</b><br/>A scleral buckle, which is made of solid silicone, or sponge, is sewn to the outer wall of the eye (the sclera). The buckle is like a tight belt around the eye, which compresses the eye so that the hole or tear in the retina is pushed against the outer scleral wall. The hole or tear is then sealed by cryotherapy (freezing) or laser. The buckle is usually left in place permanently. It is normally not visible because it is located half way around the back of the eye and is covered by the conjunctiva (the skin covering the eye ball).</p> <p><b>Pneumatic retinopexy</b><br/>A gas bubble is injected directly inside the vitreous cavity of the eye to push the detached retina against the back wall of the eye. The gas bubble initially expands and then disappears over two to six weeks. The hole or tear is sealed by cryotherapy (freezing) or laser.</p> | <p>Cryotherapy or laser treatment is applied to seal the retinal tear before the buckle is secured. Scleral buckling works well for detachments caused by retinal breaks and is often chosen for younger patients or those without significant vitreous changes.<sup>3</sup></p> <p><b>Pneumatic Retinopexy</b><br/>Pneumatic retinopexy is a less invasive, office-based procedure. The surgeon injects a small gas bubble (such as SF6 or C3F8) into the vitreous cavity. The patient's head is positioned so the bubble floats against the retinal tear, sealing it temporarily. Cryotherapy or laser treatment is used to create permanent adhesion around the tear. Over days to weeks, the bubble is absorbed while the retina remains attached. This technique is most suitable for certain small, superior (upper) retinal detachments and requires strict head positioning after the procedure.</p> <p>Each approach has specific indications, success rates, and recovery considerations. The choice depends on the location and size of the detachment, the patient's eye health, and the surgeon's assessment. Prompt surgery is essential to protect and restore vision.</p> | <p>Used for complex detachments, this surgery involves making tiny incisions in the eye wall. The surgeon removes the vitreous gel, which is often the source of the traction pulling the retina away. With the gel removed, the surgeon typically uses a laser to repair tears. The eye is then filled with a gas bubble or silicone oil to act as a temporary splint, holding the retina flat against the eye wall while it heals. If a gas bubble is used, you must avoid air travel until it dissipates. If silicone oil is used, a second surgery is generally required months later to remove it to restore clear vision.</p> |
|--|--|--|-----------------------------------------------------------------------------------------------------------------------------------------------------------------------------------------------------------------------------------------------------------------------------------------------------------------------------------------------------------------------------------------------------------------------------------------------------------------------------------------------------------------------------------------------------------------------------------------------------------------------------------------------------------------------------------------------------------------------------------------------------------------------------------------------------------------------------------------------------------------------------------------------------------------------------------------------------------------------------------------|-------------------------------------------------------------------------------------------------------------------------------------------------------------------------------------------------------------------------------------------------------------------------------------------------------------------------------------------------------------------------------------------------------------------------------------------------------------------------------------------------------------------------------------------------------------------------------------------------------------------------------------------------------------------------------------------------------------------------------------------------------------------------------------------------------------------------------------------------------------------------------------------------------------------------------------------------------------------------------------------------------------------------------------------------------------------------------------------------------------------------------------------------------------------------------------------|-------------------------------------------------------------------------------------------------------------------------------------------------------------------------------------------------------------------------------------------------------------------------------------------------------------------------------------------------------------------------------------------------------------------------------------------------------------------------------------------------------------------------------------------------------------------------------------------------------------------------------------|

|                                                                                                                |                                                   |                                                                                  |                                                                                                                                                                                                                                                                                                                                                                                                                                                                                                                                                                                                                                                                                                                                           |                                                                                                                                                                                                                                                                                                                                                                                                                                                                                                                                                                                                                                                                                                                                                                                                       |                                                                                                                                                                                                                                                                                                                                                                                                                                                                                                                                                                                                                                                                                                                                                                                             |
|----------------------------------------------------------------------------------------------------------------|---------------------------------------------------|----------------------------------------------------------------------------------|-------------------------------------------------------------------------------------------------------------------------------------------------------------------------------------------------------------------------------------------------------------------------------------------------------------------------------------------------------------------------------------------------------------------------------------------------------------------------------------------------------------------------------------------------------------------------------------------------------------------------------------------------------------------------------------------------------------------------------------------|-------------------------------------------------------------------------------------------------------------------------------------------------------------------------------------------------------------------------------------------------------------------------------------------------------------------------------------------------------------------------------------------------------------------------------------------------------------------------------------------------------------------------------------------------------------------------------------------------------------------------------------------------------------------------------------------------------------------------------------------------------------------------------------------------------|---------------------------------------------------------------------------------------------------------------------------------------------------------------------------------------------------------------------------------------------------------------------------------------------------------------------------------------------------------------------------------------------------------------------------------------------------------------------------------------------------------------------------------------------------------------------------------------------------------------------------------------------------------------------------------------------------------------------------------------------------------------------------------------------|
| <p>What will my eye be like after the surgery? + What will my sight be like with the gas bubble in my eye?</p> | <p>What will my vision be like after surgery?</p> | <p>What will my vision be like after surgery? (restrict answer to 124 words)</p> | <p>Your vision will be blurred for a few weeks following your operation if a gas bubble is used. The gas bubble will gradually get absorbed, which will appear as a wobbly black ring in your line of vision. The bubble will move and gradually get smaller or break into smaller bubbles, and eventually disappear. If oil is used, your vision will remain blurry whilst the oil is in your eye. You may or may not notice a significant improvement in your vision after the operation, depending on the extent of the retinal detachment before surgery. The main aim of the operation is to prevent your vision from getting worse. Most people will notice an improvement, but it may take several months before this happens.</p> | <p>Vision after retinal detachment surgery varies depending on how quickly treatment was performed, the extent of detachment, and whether the macula (central retina) was involved. If the macula was spared, vision recovery can be substantial, though some distortion or blurriness may remain. If it was detached, central vision may not fully return, even after successful reattachment. Early after surgery, vision is often blurry due to healing, swelling, or the presence of a gas bubble, which temporarily blocks part of your sight until it absorbs. Colors and clarity may gradually improve over weeks to months. Some patients experience lasting changes, such as reduced sharpness or mild distortion. Regular follow-up helps monitor healing and optimize visual outcomes.</p> | <p>Expect blurry vision immediately following surgery. Improvement is gradual, often taking three to six months. If a gas bubble was used, your sight will be poor—like looking through water—until the bubble dissolves.</p> <p>Your final visual outcome depends largely on whether the macula (central vision) was detached. If the macula remained attached, good vision usually returns. If it detached, some permanent loss of sharpness is common even after successful reattachment. You may also experience lingering distortion or reduced peripheral vision.</p> <p>Most patients eventually require a new eyeglass prescription once healing is complete. Unfortunately, full restoration to pre-detachment vision is not guaranteed, but surgery prevents total blindness.</p> |
|----------------------------------------------------------------------------------------------------------------|---------------------------------------------------|----------------------------------------------------------------------------------|-------------------------------------------------------------------------------------------------------------------------------------------------------------------------------------------------------------------------------------------------------------------------------------------------------------------------------------------------------------------------------------------------------------------------------------------------------------------------------------------------------------------------------------------------------------------------------------------------------------------------------------------------------------------------------------------------------------------------------------------|-------------------------------------------------------------------------------------------------------------------------------------------------------------------------------------------------------------------------------------------------------------------------------------------------------------------------------------------------------------------------------------------------------------------------------------------------------------------------------------------------------------------------------------------------------------------------------------------------------------------------------------------------------------------------------------------------------------------------------------------------------------------------------------------------------|---------------------------------------------------------------------------------------------------------------------------------------------------------------------------------------------------------------------------------------------------------------------------------------------------------------------------------------------------------------------------------------------------------------------------------------------------------------------------------------------------------------------------------------------------------------------------------------------------------------------------------------------------------------------------------------------------------------------------------------------------------------------------------------------|
