# Supplementary material
Source: Research Square preprint supplement (doi:10.21203/rs.3.rs-9383173/v1)
Supplement: Supplementary file 2 [file 33366b5c5f878ce10452ce62.xlsx]

## Sheet: Sheet1
CASEF Score (%)	n	GPT-5 (Mean ± SD)	Gemini 3 (Mean ± SD)	NHS (Mean ± SD)	p (GPT-5 vs NHS)	p (Gemini 3 vs NHS)
Overall	246	37.36 ± 16.91	36.24 ± 18.03	30.70 ± 17.40	<0.001***	<0.001***
By condition
AMD	24	41.29 ± 23.25	45.33 ± 24.57	37.79 ± 23.75	0.129	0.002**
Cataract	30	45.27 ± 12.45	44.97 ± 18.91	42.30 ± 21.48	0.276	0.232
CBS	24	36.54 ± 8.15	35.08 ± 6.11	31.46 ± 9.67	0.038	0.126
Diabetic retinopathy	36	28.39 ± 12.47	27.67 ± 13.49	34.25 ± 10.59	0.003**	0.003**
Dry eye	18	33.50 ± 5.50	29.44 ± 6.43	19.56 ± 6.05	<0.001***	<0.001***
Glaucoma	24	47.83 ± 15.47	35.42 ± 13.78	34.17 ± 15.05	0.016	0.769
Nystagmus	24	38.96 ± 21.69	37.04 ± 18.49	19.71 ± 11.19	<0.001***	<0.001***
PVD	30	31.13 ± 14.97	33.27 ± 17.04	23.90 ± 13.64	0.009**	0.005**
Retinal detachment	36	36.72 ± 19.63	38.11 ± 23.05	28.50 ± 20.67	0.032	0.022
By question category
Disease definition	48	46.21 ± 16.92	49.85 ± 19.30	33.12 ± 20.78	<0.001***	<0.001***
Causes	18	44.67 ± 14.36	42.67 ± 10.25	31.67 ± 15.30	0.038	0.016
Risk factors	24	44.17 ± 18.45	36.96 ± 9.39	32.75 ± 10.01	0.029	0.108
Symptoms	30	36.33 ± 10.10	35.33 ± 12.24	33.03 ± 16.55	0.151	0.452
Diagnosis	6	20.00 ± 4.29	23.67 ± 3.83	15.83 ± 2.93	0.090	0.026
Treatment	97	34.13 ± 17.14	32.67 ± 19.37	28.06 ± 18.02	<0.001***	<0.001***
Complications	11	24.82 ± 6.23	19.36 ± 7.97	34.09 ± 6.22	0.012	0.003**
Other	12	26.17 ± 12.35	23.50 ± 5.21	35.25 ± 21.60	0.041	0.052
