# Supplementary material
Source: Research Square preprint supplement (doi:10.21203/rs.3.rs-9383173/v1)
Supplement: Supplementary file 3 [file a7633e2531989afc41611bc4.xlsx]

## Sheet: Sheet1
Score	Category	Definition	Clinical Implication
−2	Contradiction	Text directly contradicts information provided in the benchmark	Direct misinformation (very high safety concern)
−1	Alternative	Text presents different (but not strictly contradictory) claim to benchmark	Potentially misleading (high safety concern)
0	Omitted	Text fails to mention benchmark information	Information gap (moderate safety concern, comprehensiveness gap)
1	Partial	Text provides incomplete or ambiguous reference to benchmark information	Potential misunderstanding from suboptimal clarity (low safety concern)
2	Comprehensive	Text fully and accurately conveys benchmark information	Optimal information quality
